# Supplementary material for: Permethrin resistance in Aedes aegypti: Genomic variants that confer knockdown resistance, recovery, and death
Source: PLoS Genet. 2021 Jun 17;17(6):e1009606. doi: 10.1371/journal.pgen.1009606 (PMC8211209; doi:10.1371/journal.pgen.1009606)
Supplement: S1 Table — The gene ID, site (based in AaegL5 genome assembly), alternate nucleotide frequency in kdr, alternate nucleotide frequency in recovered, LOD (–log10(p value)), heterozygosity in kdr, heterozygosity in recovered, total heterozygosity, amino acid substitution, functional category, vector base aliases and gene description. (XLSX) [file pgen.1009606.s001.xlsx]

## Sheet: Sheet1
Gene ID	Site	Frequency in kdr	Frequency in recovered	LOD	Heterozygosity in kdr	Heterozygosity in recovered	Total heterozygosity	Aminoacid	Substitution	Chromosome	Category	Aliases	Description
LOC5566778	47437603	0.905365	0.213462	22.1593	0.172336	0.336036	0.496713	D756E	TG	1	DIV	AaeL_AAEL005639, AAEL005639	ER degradation-enhancing alpha-mannosidase-like protein 2
LOC5566778	47437555	0.0871212	0.527381	10.8482	0.157104	0.499314	0.4066	N772K	GT	1	DIV	AaeL_AAEL005639, AAEL005639	ER degradation-enhancing alpha-mannosidase-like protein 2
LOC5572000	98112599	0.481106	0.0597643	10.7292	0.499541	0.106328	0.387447	P194S	GA	1	DIV	AaeL_AAEL009486, AAEL009486	bis(5'-adenosyl)-triphosphatase ENPP4
LOC5568342	185212546	0.57266	0.146601	9.50611	0.489217	0.275615	0.480964	N27K	GT	1	DIV	AaeL_AAEL001065, AAEL001065	SAYSvFN domain-containing protein 1
LOC5568406	52784650	0.629953	0.202279	9.11781	0.467682	0.334252	0.483072	G50D	CT	1	DIV	AaeL_AAEL006823, AAEL006823	probable 4-coumarate--CoA ligase 3
LOC5580014	222902247	0.671296	0.977941	7.99266	0.436656	0.0437737	0.311411	N315S	CT	1	RRTT	AaeL_AAEL009641, AAEL009641	ski oncogene
LOC5577255	142844737	0.394354	0.786927	7.85253	0.48	0.336735	0.492048	F504Y	AT	1	DIV	AaeL_AAEL013115, AAEL013115	GPI inositol-deacylase
LOC5572551	92030133	0.710145	0.992647	7.78	0.40911	0.0163923	0.257792	M634T	GA	1	CYT/STR	AaeL_AAEL009877, AAEL009877	amyloid protein-binding protein 2
LOC5572787	66154155	0	0.27027	7.71658	0	0.394449	0.19947	E757G	TC	1	SigT	AaeL_AAEL001890, AAEL001890	type I inositol 3,4-bisphosphate 4-phosphatase
LOC5580020	60675944	0.67121	0.28036	7.57945	0.439509	0.404149	0.498939	V121I	GA	1	Redox	AaeL_AAEL009656, AAEL009656, CYP6AL3	cytochrome P450 (CYP6AL3)
LOC5565936	298348061	0.17584	0.550424	7.51608	0.286243	0.494284	0.463593	S212T	TA	1	DIV	AaeL_AAEL005047, AAEL005047	TELO2-interacting protein 1 homolog
LOC5568347	301213992	0.833333	0.466168	7.27911	0.277778	0.495241	0.446834	A84V	TC	1	Redox	AaeL_AAEL001059, AAEL001059, GSTD3	glutathione transferase delta 3 (GSTD)
LOC5567044	122211333	0.0217391	0.305078	7.22166	0.0494731	0.395144	0.198667	S246N	GA	1	RRTT	AaeL_AAEL005773, AAEL005773	doublesex and mab-3 related transcription factor 3, truncated
LOC5577654	291005262	0.91163	0.578947	7.1743	0.200783	0.487535	0.396694	Q4P	GT	1	PROT	AaeL_AAEL003230, AAEL003230, AAEL801257	ubiquitin-like domain-containing CTD phosphatase 1
LOC5569934	51910137	0.83601	0.473885	7.14333	0.27103	0.498539	0.438935	Q192E	GC	1	RRTT	AaeL_AAEL008032, AAEL008032	protein msta
LOC5570119	61576175	0.368216	0.746046	7.12443	0.467911	0.383285	0.499868	Q427L	AT	1	SigT	AaeL_AAEL008095, AAEL008086, AAEL008095	nitric oxide-associated protein 1
LOC5568369	299069023	0.487836	0.137681	7.03308	0.499962	0.242969	0.439303	T281I	GA	1	TRP	AaeL_AAEL001087, AAEL001087	synaptic vesicle glycoprotein 2B
LOC5580130	99088431	0.321759	0.0335038	7.01492	0.431154	0.0628268	0.289683	V571I	CT	1	DIV	AaeL_AAEL002451, AAEL002451	zinc finger protein 1
LOC5565115	70010896	0.272252	0.646019	6.94487	0.396158	0.453776	0.487293	*383R	TC	1	DIV	AaeL_AAEL014729, AAEL014729	lymphokine-activated killer T-cell-originated protein kinase
LOC5572339	209920687	0.503934	0.152742	6.90785	0.499885	0.256319	0.429848	T396M	GA	1	UNK	AaeL_AAEL009727, AAEL009727	uncharacterized protein LOC5572339
LOC5577255	142844731	0.392004	0.760902	6.88663	0.479252	0.368618	0.495036	Y502F	TA	1	DIV	AaeL_AAEL013115, AAEL013115	GPI inositol-deacylase
LOC5577665	290784555	0.142312	0.486348	6.7945	0.244898	0.499607	0.424191	G19S	GA	1	PROT	AaeL_AAEL012785, AAEL012780, AAEL012785, CLIPB23	transmembrane protease serine 9|uncharacterized protein LOC5577665
LOC5570651	53383345	0.665474	0.296703	6.74486	0.455	0.416484	0.499993	E771D	CA	1	DIV	AaeL_AAEL008465, AAEL008465	gamma-tubulin complex component 3 homolog
LOC5579074	304012379	0.0786914	0.390734	6.71495	0.146605	0.469481	0.328385	F6C	TG	1	PROT	AaeL_AAEL003834, AAEL003834	low choriolytic enzyme|zinc metalloproteinase nas-4
LOC5576117	304742683	0.348901	0.715357	6.68465	0.461166	0.40745	0.490745	Q886R	GA	1	UNK	AaeL_AAEL002786, AAEL002786	uncharacterized protein YFR016C
LOC5578273	229255990	0.23434	0	6.58908	0.340894	0	0.170202	F17L	TG	1	IMM	AaeL_AAEL003507, AAEL003507, TOLL1B	protein toll
LOC5577255	142844726	0.298111	0.661531	6.56971	0.425336	0.450139	0.494586	K500N	GC	1	DIV	AaeL_AAEL013115, AAEL013115	GPI inositol-deacylase
LOC5567507	265545108	0.156609	0.496766	6.53449	0.265573	0.499621	0.396429	V640A	AG	1	SigT	AaeL_AAEL006120, AAEL006110, AAEL006120	G protein-coupled receptor kinase 2
LOC5575793	270492951	0	0.231343	6.50278	0	0.355647	0.206593	I157V	TC	1	UNK	AaeL_AAEL012066, AAEL012066	uncharacterized protein LOC5575793
LOC5577889	154677681	0.180533	0.525976	6.49277	0.292346	0.498866	0.451843	D31N	CT	1	PROT		E3 ubiquitin-protein ligase Mdm2
LOC5565823	230603132	0.822581	0.480769	6.40713	0.291883	0.498685	0.466939	S131T	AT	1	MET	AaeL_AAEL014995, AAEL014995	ornithine decarboxylase 1
LOC5577057	215153732	0.26	0.614839	6.37285	0.3848	0.46875	0.49555	P367S	GA	1	UNK	AaeL_AAEL003095, AAEL003095, AAEL003101	uncharacterized protein LOC5577057
LOC5572129	40098556	0.257882	0.611815	6.35116	0.382934	0.46237	0.497691	S560N	CT	1	TRP		transient receptor potential cation channel protein painless
LOC23687795	197232210	0.608137	0.911836	6.30517	0.476228	0.166653	0.381122	G180E	AG	1	RRTT		ribonucleoside-diphosphate reductase subunit M2
LOC5577657	290954385	0.468048	0.141245	6.28847	0.497949	0.262835	0.414698	F296S	TC	1	PROT		melanization protease 1
LOC5578310	61628910	0.490982	0.824579	6.17829	0.498141	0.292346	0.482144	I352L	GT	1	UNK	AaeL_AAEL013627, AAEL008077, AAEL013627	uncharacterized protein LOC5578310
LOC5570528	28810976	0.21972	0	6.17038	0.344977	0	0.214621	E218V	TA	1	DIV	AaeL_AAEL001427, AAEL001427	hydroxysteroid dehydrogenase-like protein 2
LOC110674064	247218531	0	0.219286	6.15802	0	0.35503	0.204142	H252Q	CG	1	RRTT		DNA repair protein XRCC3-like
LOC5578307	61857297	0.573333	0.302003	6.13413	0.489512	0.461461	0.525764	T199I	CAT	1	PROT	AaeL_AAEL013628, AAEL013628	trypsin alpha-3|serine protease III
LOC5578310	61628882	0.54965	0.866071	6.06318	0.495194	0.228532	0.451936	K361R	CT	1	UNK	AaeL_AAEL013627, AAEL008077, AAEL013627	uncharacterized protein LOC5578310
LOC110679564	56352871	0.00609756	0.230927	6.05983	0.0129027	0.366981	0.235921	R579S	CA	1	SigT		activating signal cointegrator 1 complex subunit 2-like
LOC5578994	203200356	0.307933	0.0433076	6.05774	0.405211	0.0751537	0.282336	T22A	TC	1	MIT	AaeL_AAEL003801, AAEL003801	28S ribosomal protein S5, mitochondrial
LOC5572415	276097952	0.108295	0.412568	6.02388	0.196064	0.483601	0.389838	I229V	TC	1	CYT/STR	AaeL_AAEL009783, AAEL009783	cuticle protein
LOC23687986	73779190	0.120779	0.429435	5.99051	0.2112	0.495223	0.412385	E174D	CA	1	RRTT	AaeL_AAEL017566, AAEL017566	DNA ligase 1
LOC5576350	255986330	0.556777	0.220009	5.98731	0.489796	0.347516	0.4837	T227I	GA	1	DIV	AaeL_AAEL002857, AAEL002857	saccharopine dehydrogenase-like oxidoreductase
LOC5575793	270492930	0	0.212955	5.9786	0	0.335394	0.19249	V164I	CT	1	UNK	AaeL_AAEL012066, AAEL012066	uncharacterized protein LOC5575793
LOC5574596	177334156	0.1477	0.464992	5.94588	0.25044	0.497546	0.428835	Q705E	GC	1	PROT	AaeL_AAEL002426, AAEL002426	endoplasmic reticulum metallopeptidase 1
LOC5568406	52784355	0.0806837	0.366758	5.91727	0.165936	0.465799	0.34188	M148I	CG	1	DIV	AaeL_AAEL006823, AAEL006823	probable 4-coumarate--CoA ligase 3
LOC110674149	280153315	0.455665	0.142835	5.8659	0.497167	0.239546	0.406389	L89S	TC	1	TRP		heat shock protein 70 A1-like
LOC5577527	201906337	0.262759	0.0238095	5.84844	0.388198	0.0341777	0.251545	T653S	TA	1	CYT/STR	AaeL_AAEL013242, AAEL005791, AAEL013242	protein abnormal spindle
LOC5564104	303782393	0.571851	0.237973	5.8202	0.495696	0.357958	0.475245	A37V	CT	1	DIV	AaeL_AAEL014322, AAEL014322	myogenic-determination protein
LOC23687986	73779106	0.195841	0.52193	5.81472	0.317353	0.499493	0.479676	D202E	AT	1	RRTT	AaeL_AAEL017566, AAEL017566	DNA ligase 1
LOC5566217	3079762	0	0.20675	5.80375	0	0.327659	0.177534	A312V	GA	1	MIT	AaeL_AAEL005279, AAEL005279	methionyl-tRNA formyltransferase, mitochondrial
LOC5565189	306787290	0.497491	0.818523	5.7677	0.499956	0.285932	0.461747	N45S	CT	1	RRTT		basic helix-loop-helix transcription factor amos
LOC5579074	304012369	0.070197	0.344453	5.76431	0.129452	0.4608	0.300554	P3S	CT	1	PROT	AaeL_AAEL003834, AAEL003834	low choriolytic enzyme|zinc metalloproteinase nas-4
LOC5577657	290954381	0.430355	0.127191	5.75794	0.488272	0.244898	0.394652	*295E	TG	1	PROT		LOW QUALITY PROTEIN: melanization protease 1
LOC5574594	177314573	0.606619	0.897599	5.72421	0.467383	0.186091	0.378597	N797D	GA	1	PROT	AaeL_AAEL002408, AAEL002408	endoplasmic reticulum metallopeptidase 1
LOC5575002	88742371	0.057971	0.31899	5.62581	0.0989036	0.452032	0.316828	S796N	CT	1	UNK		uncharacterized protein LOC5575002
LOC110674190	294858828	0.0182927	0.243132	5.61984	0.0434568	0.3559	0.193762	L621V	TG	1	DIV	AaeL_AAEL005073, AAEL005073	myosin-2 heavy chain-like
LOC5576738	262413673	0.734866	0.404725	5.61684	0.386841	0.483327	0.491752	A82V	AG	1	UNK	AaeL_AAEL002962, AAEL002962	uncharacterized protein LOC5576738
LOC5574426	24559537	0.20004	0	5.6158	0.315814	0	0.191504	G183R	CG	1	DIV	AaeL_AAEL011144, AAEL011144	pancreatic lipase-related protein 2
LOC5572415	276097955	0.115567	0.406017	5.53727	0.20832	0.48179	0.388198	L228I	GT	1	CYT/STR	AaeL_AAEL009783, AAEL009783	cuticle protein
LOC5578691	188950843	0.727563	0.403585	5.41943	0.391902	0.486352	0.480293	V17L	CG	1	PROT	AaeL_AAEL003632, AAEL003632, CLIPB39	serine protease easter
LOC5570709	111417598	0.876441	0.588601	5.37029	0.223232	0.487535	0.39215	P40S	AG	1	DIV	AaeL_AAEL001449, AAEL001449	uncharacterized protein LOC5570709|zinc finger protein SNAI2
LOC5573055	272124150	0.44783	0.764186	5.32848	0.495772	0.360258	0.45276	K793I	AT	1	DIV	AaeL_AAEL010252, AAEL010252	putative protein tag-278
LOC5577657	290953893	0.550481	0.234482	5.32415	0.494649	0.357234	0.460851	A153V	CT	1	PROT		LOW QUALITY PROTEIN: melanization protease 1
LOC5577657	290954366	0.435363	0.1423	5.31664	0.495349	0.250668	0.415225	L290M	TA	1	PROT		LOW QUALITY PROTEIN: melanization protease 1
LOC5577657	290954387	0.394891	0.114018	5.29084	0.481474	0.232234	0.380219	G297S	GA	1	PROT		LOW QUALITY PROTEIN: melanization protease 1
LOC5570698	111822300	0	0.187965	5.2804	0	0.2828	0.175831	I675V	TC	1	MET	AaeL_AAEL001457, AAEL001457	head-specific guanylate cyclase
LOC5578273	229257707	0.223281	0.0151515	5.2533	0.342132	0.0403869	0.216891	D590N	GA	1	IMM	AaeL_AAEL003507, AAEL003507, TOLL1B	protein toll
LOC5578992	203578305	0.905844	0.636012	5.25049	0.146918	0.464291	0.344627	Q941H	GC	1	RRTT	AaeL_AAEL003800, AAEL003800, AAEL015316	5'-3' exoribonuclease 2 homolog
LOC23687795	197232194	0.660273	0.920975	5.23107	0.448558	0.149382	0.350888	I175F	TA	1	RRTT		LOW QUALITY PROTEIN: ribonucleoside-diphosphate reductase subunit M2
LOC110674095	262687417	0.680791	0.36129	5.21371	0.432133	0.46728	0.497421	T32M	AG	1	PROT		CAAX prenyl protease 1 homolog pseudogene
LOC5569204	46337458	0.0503892	0.290871	5.20931	0.0986334	0.39589	0.284181	P14L	GA	1	DIV	AaeL_AAEL007464, AAEL007464	zinc finger protein 223
LOC5576675	203028468	1	0.81472	5.20631	0	0.299875	0.18	V44I	AG	1	UNK	AaeL_AAEL012703, AAEL012703	uncharacterized protein LOC5576675
LOC5571310	81046593	0.445229	0.15279	5.20197	0.49408	0.260607	0.414564	Y25C	TC	1	RRTT	AaeL_AAEL008943, AAEL008943	trichohyalin
LOC5569917	74411398	0.815644	1	5.18084	0.298929	0	0.197531	Y230C	CT	1	Redox	AaeL_AAEL008018, AAEL008018, CYP4C51	cytochrome P450 (CYP4C51)
LOC5569249	27327114	0.268722	0.0389595	5.17393	0.378876	0.080444	0.250384	A2580T	CT	1	DIV	AaeL_AAEL007506, AAEL007506	protein lava lamp
LOC5571317	80905734	0.00912786	0.206263	5.16104	0.0180708	0.332185	0.18	S239G	TC	1	RRTT	AaeL_AAEL008942, AAEL008942	probable rRNA-processing protein EBP2 homolog
LOC5573415	30992901	0.0795739	0.337318	5.14086	0.148556	0.454523	0.355398	L1036M	CA	1	UNK	AaeL_AAEL002058, AAEL002054, AAEL002058, AAEL009260, AAEL009261, AAEL015381	uncharacterized protein LOC5573415
LOC5572878	222574704	0.445416	0.755833	5.13039	0.493543	0.35729	0.483778	A267S	TG	1	UNK	AaeL_AAEL010114, AAEL010114	uncharacterized protein LOC5572878
LOC5577442	36550266	0.407397	0.721408	5.12312	0.482028	0.400473	0.487479	S198T	AT	1	UNK	AaeL_AAEL013185, AAEL013185	uncharacterized protein LOC5577442
LOC5569197	46515707	1	1	5.09346	0.487535	0.225652	0.375	D224E	AGT	1	RRTT	AaeL_AAEL007457, AAEL007457	origin recognition complex subunit 2
LOC5571312	80947599	0.793149	0.490588	5.09096	0.337889	0.499937	0.461398	S1997A	CA	1	DIV	AaeL_AAEL008950, AAEL008949, AAEL008950, AAEL008951	inositol hexakisphosphate and diphosphoinositol-pentakisphosphate kinase 2|inositol hexakisphosphate and diphosphoinositol-pentakisphosphate kinase
LOC5580123	99061242	0.268772	0.049136	5.06632	0.410707	0.0927384	0.255857	Q338*	GAT	1	DIV	AaeL_AAEL002454, AAEL002454	zinc finger protein OZF
LOC5579479	45628640	0.251899	0.0322354	5.06429	0.373113	0.0570934	0.219368	S790N	CT	1	DIV	AaeL_AAEL014706, AAEL014706, AAEL015339, AAEL015340	nuclear mitotic apparatus protein 1
LOC5576488	108769639	0.598516	0.875439	5.06117	0.480777	0.207612	0.410311	N37H	GT	1	UNK	AaeL_AAEL002900, AAEL002900	uncharacterized protein LOC5576488|hypothetical conserved protein
LOC5574451	276999038	0.387947	0.700243	5.03345	0.469848	0.418859	0.496008	M524V	CT	1	DIV	AaeL_AAEL011169, AAEL011169, HEX2a	hexamerin-1.1|hexamerin 2 alpha
LOC5574724	16539374	0.10002	0.364693	5.02851	0.178676	0.463757	0.345679	I316M	TC	1	DIV	AaeL_AAEL011356, AAEL011356	prostaglandin reductase 1
LOC5565944	298328327	0.211676	0.0142857	4.98362	0.336036	0.0235261	0.225242	E613*	CA	1	DIV	AaeL_AAEL005074, AAEL005074	zinc finger protein 25|zinc finger protein 62 homolog|zinc finger protein 658B|zinc finger protein 665
LOC5577581	301991529	0.664432	0.917626	4.97261	0.444444	0.144848	0.316044	A40E	TG	1	UNK	AaeL_AAEL013291, AAEL013291	uncharacterized protein LOC5577581
LOC5567803	194424532	0.0182927	0.219599	4.95978	0.038324	0.341797	0.205036	E132G	TC	1	DIV	AaeL_AAEL000122, AAEL000122, AAEL009996	zinc finger protein 70|zinc finger protein 761
LOC5567791	194830368	0.515077	0.216876	4.92044	0.499541	0.337017	0.453839	V52I	GA	1	LIPID	AaeL_AAEL000131, AAEL000131, AAEL000135	fatty acid hydroxylase domain-containing protein 2
LOC5571624	218628938	0.277927	0.0496951	4.88686	0.399076	0.092689	0.276116	P105S	CT	1	DIV	AaeL_AAEL009208, AAEL009208	zinc finger protein 853
LOC5569467	13130006	0.591283	0.86526	4.87586	0.47674	0.211932	0.394449	N5S	CT	1	UNK	AaeL_AAEL007652, AAEL007652	uncharacterized protein LOC5569467
LOC5569271	197896368	0.271085	0.0465179	4.85544	0.39551	0.0900242	0.275274	V538I	CT	1	CSR	AaeL_AAEL007507, AAEL007507	nose resistant to fluoxetine protein 6
LOC5567803	194424541	0.0179641	0.214337	4.83395	0.0379605	0.336462	0.203461	N129T	TG	1	DIV	AaeL_AAEL000122, AAEL000122, AAEL009996	zinc finger protein 70|zinc finger protein 761
LOC5565015	119357343	0.335029	0.641137	4.82699	0.447845	0.459646	0.499441	S532N	GA	1	UNK	AaeL_AAEL014695, AAEL014695	uncharacterized protein LOC5565015
LOC5565189	306787194	0.225374	0.0234375	4.81944	0.35173	0.0508129	0.211763	S77F	GA	1	RRTT		basic helix-loop-helix transcription factor amos
LOC5576470	108147051	0.705942	0.939527	4.81669	0.413964	0.118222	0.28042	Q916K	AC	1	SigT	AaeL_AAEL002918, AAEL002918	arf-GAP with coiled-coil, ANK repeat and PH domain-containing protein 1
LOC5579009	44215695	0.41641	0.142593	4.79612	0.492188	0.232569	0.405338	L505V	TG	1	UNK	AaeL_AAEL003791, AAEL003791	uncharacterized protein F54F2.9
LOC5564150	68197621	0.559618	0.260974	4.75404	0.492926	0.395059	0.488221	G43V	CA	1	DIV	AaeL_AAEL011921, AAEL011921, AAEL014330	F-box/LRR-repeat protein 4
LOC5578273	229257102	0.729443	0.429792	4.75279	0.399931	0.492619	0.477453	Y388F	TA	1	IMM	AaeL_AAEL003507, AAEL003507, TOLL1B	protein toll
LOC5573797	239734432	0.697366	0.932195	4.71747	0.422468	0.13644	0.333166	S426T	GC	1	RRTT	AaeL_AAEL010723, AAEL010723	transcription elongation factor B polypeptide 3
LOC5565140	307042982	0	0.167085	4.70861	0	0.261621	0.141246	P1071R	GC	1	UNK	AaeL_AAEL004621, AAEL004621, AAEL004622	uncharacterized protein LOC5565140
LOC5571992	98421051	0.476144	0.191429	4.70751	0.49987	0.314745	0.463949	A264T	CT	1	UNK	AaeL_AAEL009485, AAEL009485	uncharacterized protein LOC5571992
LOC5570457	81641811	0.970588	0.767	4.69695	0.0377219	0.359225	0.216891	A156V	AG	1	DIV	AaeL_AAEL008343, AAEL008343	O-acyltransferase like protein
LOC5569205	46327960	0.0647956	0.295027	4.64736	0.113464	0.409344	0.298526	P189T	CA	1	RRTT	AaeL_AAEL007461, AAEL007461	transcription factor Ouib
LOC5567112	22535204	0.164649	0	4.64255	0.27412	0	0.144043	S573T	TA	1	UNK	AaeL_AAEL005826, AAEL005826	uncharacterized protein LOC5567112
LOC5566217	3079754	0	0.16426	4.63202	0	0.284082	0.1437	I315V	TC	1	MIT	AaeL_AAEL005279, AAEL005279	methionyl-tRNA formyltransferase, mitochondrial
LOC5573637	264482260	0.212228	0.0208333	4.60808	0.338085	0.0475907	0.218206	G17R	CT	1	UNK	AaeL_AAEL010627, AAEL010627	uncharacterized protein LOC5573637
LOC5576117	304742850	0.704174	0.407967	4.60359	0.413194	0.484687	0.489088	G942S	AG	1	UNK	AaeL_AAEL002786, AAEL002786	uncharacterized protein YFR016C
LOC5574974	90513381	0.793179	0.509223	4.5986	0.317025	0.496924	0.451492	A31V	TC	1	RRTT	AaeL_AAEL002502, AAEL002502	dnaJ homolog subfamily C member 16
LOC5578273	229256024	0.162399	0	4.58163	0.246857	0	0.120466	V29I	GA	1	IMM	AaeL_AAEL003507, AAEL003507, TOLL1B	protein toll
LOC5576275	45878788	0.481946	0.769231	4.5686	0.498866	0.35503	0.476371	*355Y	AC	1	DIV		4-coumarate--CoA ligase-like 9
LOC5577665	290805666	0.991573	0.816928	4.56768	0.0214261	0.283523	0.163379	Q903H	TA	1	PROT	AaeL_AAEL012785, AAEL012780, AAEL012785, CLIPB23	transmembrane protease serine 9|uncharacterized protein LOC5577665
LOC5564249	15673967	0.505445	0.789009	4.56643	0.499753	0.317831	0.459515	T244S	AT	1	DIV	AaeL_AAEL004195, AAEL004195	membrane-associated progesterone receptor component 1
LOC5564409	105033176	0.524107	0.236091	4.56513	0.498432	0.356125	0.464057	L29V	GC	1	DIV	AaeL_AAEL004230, AAEL004230	pheromone-processing carboxypeptidase KEX1|uncharacterized protein LOC5564409
LOC5578731	18175043	0.161664	0	4.56176	0.272188	0	0.186368	A51D	GT	1	DIV	AaeL_AAEL013841, AAEL013841	paraplegin
LOC5564683	235832475	0.199632	0.480397	4.55628	0.327254	0.498349	0.429257	L249M	GT	1	Redox	AaeL_AAEL004388, AAEL004388, HPX8A	Heme Peroxidase (HPX8A)
LOC5572580	206757323	0.112959	0.365579	4.54857	0.196064	0.46401	0.348364	D516V	TA	1	UNK	AaeL_AAEL009899, AAEL009899	uncharacterized protein LOC5572580
LOC5570709	111417614	0.834541	0.563914	4.52161	0.275329	0.495673	0.424016	D34E	TA	1	DIV	AaeL_AAEL001449, AAEL001449	uncharacterized protein LOC5570709|zinc finger protein SNAI2
LOC5578691	188951512	0.421053	0.154882	4.4905	0.49599	0.255	0.428576	P196Q	CA	1	PROT	AaeL_AAEL003632, AAEL003632, CLIPB39	serine protease easter
LOC5569197	46515704	0.346939	0.101852	4.48604	0.459184	0.184089	0.330586	D225E	AT	1	RRTT	AaeL_AAEL007457, AAEL007457	origin recognition complex subunit 2
LOC5564065	137417705	0.252056	0.538499	4.46459	0.379504	0.496713	0.465974	T174A	TC	1	DIV	AaeL_AAEL004081, AAEL004081	protein dj-1beta
LOC110674150	280174062	0.210156	0.0227273	4.44395	0.327393	0.0427603	0.225527	R218S	TA	1	TRP		heat shock protein 70 A1-like
LOC5577255	142844719	0.43156	0.719888	4.43123	0.493289	0.411357	0.494559	T498M	TC	1	DIV	AaeL_AAEL013115, AAEL013115	GPI inositol-deacylase
LOC5579817	8639774	0.311467	0.601705	4.42176	0.429117	0.48	0.49208	P326L	GA	1	DIV	AaeL_AAEL005531, AAEL005531	venom allergen 5
LOC5574728	95098966	0.256029	0.0483921	4.35987	0.387254	0.114616	0.259267	L145M	TA	1	MET	AaeL_AAEL011367, AAEL011367	GDP-D-glucose phosphorylase 1
LOC5565140	307042988	1	1	4.35694	0.293367	0.0240928	0.174191	I1069S	GAC	1	UNK	AaeL_AAEL004621, AAEL004621, AAEL004622	uncharacterized protein LOC5565140
LOC5572579	207188354	0	0.153581	4.34395	0	0.250026	0.117424	D298H	GC	1	DIV	AaeL_AAEL009904, AAEL009904	stress response protein NST1
LOC5571379	59112923	0.547046	0.264042	4.33834	0.498012	0.396455	0.479882	R1804S	TA	1	DIV	AaeL_AAEL009022, AAEL009022, AAEL017420	Ca(2+)/calmodulin-responsive adenylate cyclase
LOC5571213	77831918	0.291883	0.0703212	4.32444	0.38534	0.131211	0.307089	A236S	CA	1	UNK	AaeL_AAEL008909, AAEL008909	uncharacterized protein LOC5571213
LOC5567076	201571597	0	0.152778	4.32239	0	0.2591	0.127479	R372Q	CT	1	DIV	AaeL_AAEL005819, AAEL005819	probable low-specificity L-threonine aldolase 2
LOC5564602	150230236	0.146324	0.403017	4.32134	0.241191	0.484198	0.386565	I341S	AC	1	UNK	AaeL_AAEL014522, AAEL014522	uncharacterized protein LOC5564602
LOC5570587	93505779	0	0.152085	4.30378	0	0.263328	0.113454	P162R	GC	1	DIV	AaeL_AAEL008397, AAEL008397, GPXH2, GPx	Glutathione Peroxidase (GPXH2)
LOC5576117	304742971	0.355666	0.113248	4.28329	0.458923	0.200124	0.369774	G982D	GA	1	UNK	AaeL_AAEL002786, AAEL002786	uncharacterized protein YFR016C
LOC5567410	184388917	0.0333333	0.22494	4.2723	0.0420858	0.34896	0.241699	G63S	CT	1	DIV	AaeL_AAEL006069, AAEL006069	shootin-1
LOC5567568	125411491	0.205994	0.0238365	4.2698	0.332097	0.0490487	0.221919	N619S	TC	1	MET	AaeL_AAEL006157, AAEL006157	Aldehyde oxidase (ALDOX 06157)
LOC5576675	203028514	1	0.84951	4.26102	0	0.247705	0.111902	V59A	CT	1	UNK	AaeL_AAEL012703, AAEL012703	uncharacterized protein LOC5576675
LOC5576756	38203622	0	0.15035	4.25726	0	0.255489	0.138602	R143H	CT	1	CSR	AaeL_AAEL015357, AAEL015357	nose resistant to fluoxetine protein 6
LOC5576756	38203905	0.884743	0.643509	4.23125	0.204142	0.454523	0.309914	S68N	TC	1	CSR	AaeL_AAEL015357, AAEL015357	nose resistant to fluoxetine protein 6
LOC5576117	304742838	0.68186	0.39902	4.2224	0.437283	0.482853	0.494239	M938L	TA	1	UNK	AaeL_AAEL002786, AAEL002786	uncharacterized protein YFR016C
LOC5576117	304742779	0.466276	0.742824	4.1972	0.49973	0.385284	0.46401	L918S	CT	1	UNK	AaeL_AAEL002786, AAEL002786	uncharacterized protein YFR016C
LOC5572334	209764399	0.320536	0.102414	4.19091	0.433539	0.185604	0.325072	P159Q	GAT	1	PROT	AaeL_AAEL009726, AAEL009726	serine protease 7
LOC5576724	261386006	0.0374716	0.229262	4.17825	0.0632568	0.353564	0.222187	A323T	GA	1	CYT/STR	AaeL_AAEL002959, AAEL002959	endochitinase
LOC5573869	178589174	0.568932	0.289877	4.17333	0.487838	0.419455	0.49418	A164V	CT	1	UNK	AaeL_AAEL010790, AAEL010790	uncharacterized protein LOC5573869
LOC5575834	181605	0.76409	0.958267	4.1454	0.359443	0.073288	0.259936	K339N	AC	1	DIV	AaeL_AAEL012104, AAEL012104	tetratricopeptide repeat protein 21B
LOC5573379	204021006	0.2395	0.0437071	4.14529	0.355942	0.0835224	0.248955	T209S	TA	1	UNK	AaeL_AAEL010472, AAEL010472	uncharacterized protein LOC5573379
LOC5578273	229256288	0.440476	0.180797	4.13979	0.493543	0.293011	0.408163	D117N	GA	1	IMM	AaeL_AAEL003507, AAEL003507, TOLL1B	protein toll
LOC5573408	58366355	0.227534	0.0373424	4.13893	0.351897	0.0719714	0.21818	P330S	CT	1	UNK	AaeL_AAEL002072, AAEL002072	uncharacterized protein LOC5573408
LOC5578727	17915715	0.400955	0.150309	4.13694	0.478411	0.250865	0.41748	V238A	AG	1	DIV	AaeL_AAEL013842, AAEL013842	rabenosyn-5
LOC110676634	111522176	0.300076	0.577628	4.11588	0.425826	0.488215	0.49056	A79T	CT	1	UNK		uncharacterized protein LOC110676634
LOC5571986	56749924	0.733988	0.460758	4.08799	0.40777	0.497853	0.485985	T251A	CT	1	RRTT	AaeL_AAEL009473, AAEL009473	transcription factor SOX-8
LOC5578805	274559730	0.763926	0.508004	4.08231	0.481757	0.504783	0.523312	Q507H	GAD	1	CYT/STR	AaeL_AAEL013846, AAEL013846, AAEL014521, AAEL015231	ankyrin repeat domain-containing protein 12
LOC5565115	70010887	0.308334	0.585016	4.08046	0.430528	0.481155	0.490343	*380G	TG	1	DIV	AaeL_AAEL014729, AAEL014729	LOW QUALITY PROTEIN: lymphokine-activated killer T-cell-originated protein kinase
LOC5578731	18175046	0.143333	0	4.0697	0.24623	0	0.173681	N50S	TC	1	DIV	AaeL_AAEL013841, AAEL013841	paraplegin
LOC5576532	285508202	0.0144928	0.177348	4.03564	0.0302959	0.276753	0.153651	E175K	CT	1	DIV	AaeL_AAEL012579, AAEL012579	aspartate aminotransferase, cytoplasmic
LOC5579509	303027310	0.97907	0.785282	4.02827	0.0558544	0.332565	0.206363	F4L	GAT	1	DIV	AaeL_AAEL015137, AAEL015137	epididymal secretory protein E1
LOC5573383	203983283	0.0974026	0.322152	4.02273	0.17502	0.440832	0.33253	A5S	CA	1	DIV	AaeL_AAEL010474, AAEL010474	ataxin-10
LOC5564685	235946299	0.0507793	0.247077	4.01466	0.0954109	0.373584	0.239198	M59L	AC	1	TRP	AaeL_AAEL004399, AAEL004399, GPRFSH, LGR1	follicle-stimulating hormone receptor|GPA2/GPB5 glycoprotein hormone receptor
LOC5569558	71650387	0.217502	0.0347826	4.00165	0.342538	0.0680005	0.225178	F192L	GC	1	UNK	AaeL_AAEL007757, AAEL007757	uncharacterized protein LOC5569558
LOC5568354	299827836	0.183395	0.437802	3.99459	0.298763	0.492732	0.41478	E110K	CT	1	Redox	AaeL_AAEL001078, AAEL001078, GSTD2	glutathione transferase delta 2 (GSTD2)
LOC110674149	280153324	0.362745	0.126554	3.99019	0.463391	0.210292	0.337107	I92T	TC	1	TRP		heat shock protein 70 A1-like
LOC5577661	290891849	0.126956	0.362917	3.98066	0.231983	0.456747	0.358037	Q24R	TC	1	PROT	AaeL_AAEL003233, AAEL003233, AAEL801262	transmembrane protease serine 9
LOC5573408	58366353	0.230937	0.0425448	3.97622	0.356094	0.0814129	0.226332	G329A	GC	1	UNK	AaeL_AAEL002072, AAEL002072	uncharacterized protein LOC5573408
LOC5576522	285304504	0.05	0.271806	3.97082	0.0849383	0.383367	0.245184	D494E	TCG	1	MIT	AaeL_AAEL012582, AAEL012582, AAEL014912	dimethyladenosine transferase 2, mitochondrial
LOC5569197	46515696	0.351786	0.119298	3.97058	0.460548	0.21068	0.346875	V228E	AT	1	RRTT	AaeL_AAEL007457, AAEL007457	origin recognition complex subunit 2
LOC5577658	290941255	0.860714	1	3.96192	0.228958	0	0.1298	S147T	AT	1	PROT	AaeL_AAEL003279, AAEL003279, AAEL801267	melanization protease 1
LOC5568897	267805042	0.195101	0.450946	3.96078	0.312175	0.495436	0.429277	L268F	GA	1	LIPID	AaeL_AAEL007213, AAEL007213	acyl-CoA Delta(11) desaturase
LOC5565115	70010350	0.381436	0.654718	3.95846	0.475856	0.449538	0.498684	R201*	TC	1	DIV	AaeL_AAEL014729, AAEL014729	LOW QUALITY PROTEIN: lymphokine-activated killer T-cell-originated protein kinase
LOC5567799	194509877	0.0290117	0.204224	3.94552	0.056404	0.327323	0.212535	N254T	AC	1	DIV	AaeL_AAEL000107, AAEL000107	zinc finger protein 83
LOC5580123	99062163	0.0611995	0.262169	3.94527	0.119233	0.371241	0.262143	S53N	CT	1	DIV	AaeL_AAEL002454, AAEL002454	zinc finger protein OZF
LOC5577197	281290344	0.715398	0.446194	3.94157	0.406576	0.490596	0.491511	E600D	AT	1	DIV	AaeL_AAEL013080, AAEL013080, AAEL013082	serine/arginine repetitive matrix protein 2
LOC5565140	307042992	0.838266	0.990566	3.92698	0.270049	0.0240928	0.161759	A1068T	TC	1	UNK	AaeL_AAEL004621, AAEL004621, AAEL004622	uncharacterized protein LOC5565140
LOC110674041	23567980	0.217476	0.0364943	3.91627	0.326515	0.0657134	0.210369	P184L	CT	1	LIPID		lipid storage droplets surface-binding protein 2-like
LOC5565944	298329021	0.62098	0.859171	3.91025	0.470416	0.234895	0.386409	M437K	TA	1	DIV	AaeL_AAEL005074, AAEL005074	zinc finger protein 25|zinc finger protein 62 homolog|zinc finger protein 658B|zinc finger protein 665
LOC5569748	69955129	0.36348	0.634584	3.89935	0.464071	0.454922	0.5	G260R	GA	1	UNK		uncharacterized LOC5569748
LOC5575266	23864216	0.343662	0.613948	3.88501	0.454523	0.474043	0.495241	I23V	TC	1	DIV	AaeL_AAEL011719, AAEL011719	nucleoporin Nup43
LOC5578310	61628691	0.054685	0.24833	3.87293	0.101403	0.377164	0.260824	K425Q	TG	1	UNK	AaeL_AAEL013627, AAEL008077, AAEL013627	uncharacterized protein LOC5578310
LOC5563999	272074986	0.864103	1	3.87193	0.236669	0	0.11776	S1473P	CT	1	UNK	AaeL_AAEL014260, AAEL014260	uncharacterized protein LOC5563999
LOC5576275	45878564	0.211672	0.0347222	3.85185	0.32958	0.0587695	0.213175	Y430F	TA	1	DIV		4-coumarate--CoA ligase-like 9
LOC5575869	142350681	0.146285	0.383363	3.83829	0.252737	0.472662	0.403989	K206N	TA	1	MET	AaeL_AAEL012140, AAEL012140	tRNA-dihydrouridine(20) synthase [NAD(P)+]-like
LOC5564376	212888112	0.0376495	0.216351	3.83067	0.0739645	0.343858	0.18859	A177T	GA	1	DIV	AaeL_AAEL014408, AAEL014408	M-phase inducer phosphatase
LOC5580052	25334374	0.865926	1	3.82357	0.239546	0	0.141389	E316D	AT	1	RRTT	AaeL_AAEL002157, AAEL002157	SCF E3 ubiquitin ligase complex F-box protein grrA|ribonuclease P protein subunit p40
LOC5567293	257092854	0.266411	0.528631	3.81993	0.391111	0.496948	0.468556	M458L	AC	1	DIV	AaeL_AAEL005943, AAEL005943	serine/threonine-protein kinase stk11
LOC5580163	228556296	0.385111	0.652778	3.81871	0.476625	0.449861	0.499749	F5V	GT	1	DIV	AaeL_AAEL002541, AAEL002541	cystinosin homolog
LOC5577581	301991551	0.668452	0.890528	3.81789	0.435639	0.182159	0.325124	S33P	GA	1	UNK	AaeL_AAEL013291, AAEL013291	uncharacterized protein LOC5577581
LOC5566507	79034637	0.0217391	0.184665	3.81662	0.0552548	0.296211	0.176693	E20Q	CG	1	MET	AaeL_AAEL005436, AAEL005436	2-(3-amino-3-carboxypropyl)histidine synthase subunit 2
LOC5576135	305347063	0.0568182	0.249409	3.80775	0.119174	0.370413	0.261322	R152C	CT	1	RRTT	AaeL_AAEL002816, AAEL002816	zinc finger and SCAN domain-containing protein 31
LOC23687848	106791548	0.262027	0.064396	3.80707	0.388148	0.121621	0.286706	L29F	TG	1	TRP	AaeL_AAEL017428, AAEL017428, GPRNNA19_2	alpha-2 adrenergic receptor
LOC5573522	50885630	0.644384	0.377075	3.80664	0.45229	0.470123	0.499954	T1122A	GA	1	RRTT	AaeL_AAEL010568, AAEL010568	chromosome-associated kinesin KIF4A
LOC5564692	40241899	0.027846	0.196285	3.79714	0.0473654	0.303714	0.19869	D9E	GT	1	UNK	AaeL_AAEL004392, AAEL004392, IMP	uncharacterized protein LOC5564692
LOC5574625	215378474	0.132238	0	3.77494	0.232118	0	0.132318	R4Q	GA	1	DIV	AaeL_AAEL011263, AAEL011263	protein D3|putative phosphatidylethanolamine-binding protein
LOC5577581	301991499	0.673274	0.892593	3.77298	0.441078	0.181239	0.339516	A50D	TG	1	UNK	AaeL_AAEL013291, AAEL013291	uncharacterized protein LOC5577581
LOC5564538	14913442	0.861552	0.338889	13.3457	0.249132	0.440832	0.475947	R577S	AT	2	DIV	AaeL_AAEL014509, AAEL014509	zinc finger protein 883
LOC5569161	134847106	0.470809	0.0322581	12.0645	0.498376	0.0519111	0.400513	Q773P	AC	2	RRTT	AaeL_AAEL007417, AAEL007417	activating transcription factor 7-interacting protein 1
LOC5573930	429277080	0.273288	0.772036	11.7955	0.402042	0.364088	0.497778	D875E	GC	2	LIPID		fatty acid synthase
LOC5568612	399164692	0.338393	0.82796	11.6743	0.429389	0.285375	0.499966	G144E	GA	2	RRTT	AaeL_AAEL006965, AAEL006965	nucleolar protein 58
LOC5579981	82063413	0.965517	0.541769	11.4675	0.055128	0.495317	0.350303	F438L	GA	2	UNK	AaeL_AAEL007729, AAEL007729	uncharacterized protein LOC5579981
LOC5575202	200977177	0	0.36052	10.5078	0	0.457535	0.290225	G196D	CT	2	DIV	AaeL_AAEL011672, AAEL011672	zinc finger protein 26
LOC5579056	102115585	0.291667	0.746528	9.95097	0.427107	0.386621	0.499947	T142S	AT	2	DIV	AaeL_AAEL013996, AAEL013996	zinc finger protein 624
LOC5569975	231091592	0.467576	0.0676768	9.80955	0.498651	0.139069	0.411126	Y755F	AT	2	DIV	AaeL_AAEL008061, AAEL008061	GPI ethanolamine phosphate transferase 1
LOC5573859	304967708	0.184322	0.625554	9.72233	0.298526	0.469481	0.4662	T86S	AT	2	PROT	AaeL_AAEL010780, AAEL010780	zinc carboxypeptidase A 1
LOC5564245	146394844	0.611801	0.176261	9.57451	0.473147	0.295702	0.487535	R651K	CT	2	UNK		uncharacterized protein LOC5564245
LOC5564273	156390639	0.672557	1	9.44985	0.446913	0	0.298929	I398M	GT	2	MET	AaeL_AAEL014371, AAEL014371	UDP-glucuronosyltransferase 2B20
LOC5572942	380180400	0.0455484	0.419098	9.44216	0.0889778	0.484757	0.336143	I340V	AG	2	Redox	AaeL_AAEL010154, AAEL010154, CYP4AR2	cytochrome P450 (CYP4AR2)
LOC5574061	108582778	0.655434	0.218014	9.39182	0.444444	0.337867	0.493031	K859Q	AC	2	RRTT	AaeL_AAEL010904, AAEL010904	ATP-dependent DNA helicase Q4
LOC5565861	445106427	0.378788	0.025	9.38069	0.470615	0.0540123	0.314745	S11L	GA	2	UNK	AaeL_AAEL005030, AAEL005030	uncharacterized protein LOC5565861
LOC5574362	235931654	0.213272	0.646538	9.26167	0.326301	0.461825	0.48797	R155C	GA	2	DIV	AaeL_AAEL011086, AAEL011086, AAEL801154	zinc finger protein Elbow
LOC5568311	84002302	0.237533	0.672844	9.24184	0.363007	0.443167	0.48486	S178N	GA	2	DIV	AaeL_AAEL006732, AAEL006732	DC-STAMP domain-containing protein 2
LOC110675877	105034439	0.112788	0.518538	9.21988	0.198819	0.499353	0.434247	A9V	CT	2	UNK	AaeL_AAEL015106, AAEL015106	uncharacterized protein LOC110675877
LOC5572794	389644164	0.0680207	0.449403	9.17947	0.132653	0.49682	0.395387	D426N	GA	2	DIV	AaeL_AAEL001902, AAEL001902	acidic amino acid decarboxylase GADL1|cysteine sulfinic acid decarboxylase|glutamate decarboxylase 1
LOC5574807	78863085	0.350208	0.0163043	9.0311	0.448275	0.0317378	0.283345	I338V	AG	2	CYT/STR	AaeL_AAEL002481, AAEL002481	probable chitinase 10
LOC5565829	444279757	0.963415	0.614525	8.87971	0.0680969	0.472612	0.377203	M49V	CT	2	LIPID	AaeL_AAEL005023, AAEL005023, AAEL801203	palmitoyltransferase ZDHHC23
LOC5574852	37356481	0.86083	0.457813	8.79222	0.24716	0.497938	0.458978	*30R	GA	2	DIV	AaeL_AAEL011451, AAEL011451	LOW QUALITY PROTEIN: protein lethal(3)malignant blood neoplasm 1
LOC110677093	431790198	0.181452	0.594051	8.72625	0.318707	0.481915	0.473067	G522E	CT	2	DIV		zinc finger protein 184-like
LOC5573173	426372196	0.235135	0.654221	8.66205	0.356038	0.447736	0.488522	S1427G	AG	2	DIV	AaeL_AAEL001977, AAEL001977	integrator complex subunit 1
LOC5576280	232997047	0.701903	1	8.54565	0.435639	0	0.321146	S567L	TC	2	PROT	AaeL_AAEL012428, AAEL012428, AAEL012435	E3 ubiquitin-protein ligase TRIM37|dentin sialophosphoprotein
LOC5569525	470687501	0.204228	0.611161	8.38259	0.328739	0.474939	0.461814	G18V	GT	2	TRP	AaeL_AAEL007709, AAEL007709, GPRGBB3	gamma-aminobutyric acid type B receptor subunit 2
LOC5567088	102766210	0.869014	0.48225	8.34768	0.225861	0.499314	0.440189	A1397T	TC	2	CYT/STR	AaeL_AAEL012315, AAEL012315	LOW QUALITY PROTEIN: centrosomal protein of 290 kDa
LOC23687770	329065447	0.126424	0.511204	8.33872	0.21366	0.5	0.385455	A266V	GA	2	UNK	AaeL_AAEL017350, AAEL017350	uncharacterized protein LOC23687770
LOC5579486	93209400	0	0.290385	8.31315	0	0.422406	0.15633	H4Y	GA	2	PROT	AaeL_AAEL015294, AAEL015294	chymotrypsin-2|salivary chymotrypsin-like enzyme
LOC5572888	35810073	0.695032	0.284685	8.25177	0.422148	0.405983	0.49815	P7S	GA	2	DIV	AaeL_AAEL010098, AAEL010098	phosphoglycolate phosphatase 2
LOC5567814	9541892	1	0.712821	8.21715	0	0.408163	0.217295	S571A	CA	2	TRP	AaeL_AAEL000992, AAEL000992, AAEL001002	sodium-coupled monocarboxylate transporter 1
LOC5564245	146396056	0.719125	0.31243	8.1251	0.405307	0.430006	0.494229	Q247R	CT	2	UNK		uncharacterized protein LOC5564245
LOC5564245	146395939	0.218843	0.618811	8.06982	0.345679	0.471408	0.483513	G286V	CA	2	UNK		uncharacterized protein LOC5564245
LOC5579471	352693059	0.665962	0.975806	8.02287	0.450139	0.0530579	0.26321	R1654H	TC	2	DIV	AaeL_AAEL013698, AAEL013697, AAEL013698, AAEL013699	LOW QUALITY PROTEIN: restin homolog
LOC5570539	47705225	0.853705	0.472582	7.99336	0.250535	0.496754	0.439541	L1134I	TG	2	UNK	AaeL_AAEL001438, AAEL001438	uncharacterized protein LOC5570539
LOC23687393	294833361	0.278571	0	7.96109	0.394054	0	0.236602	V112A	AG	2	TRP	AaeL_AAEL016973, AAEL016973	ABC transporter F family member 4
LOC5576943	62810480	0.743887	0.343905	7.9349	0.384313	0.449447	0.499826	R2371K	AG	2	DIV	AaeL_AAEL012888, AAEL012888, AAEL012889, AAEL012890	sorbin and SH3 domain-containing protein 1|uncharacterized protein LOC5576943
LOC5579471	352693058	0.682785	0.982143	7.90899	0.43875	0.0377219	0.258034	Q1654H	AC	2	DIV	AaeL_AAEL013698, AAEL013697, AAEL013698, AAEL013699	LOW QUALITY PROTEIN: restin homolog
LOC5573680	136015728	0.888127	0.523613	7.88078	0.196118	0.498303	0.3987	I141F	AT	2	MET	AaeL_AAEL010671, AAEL010671	farnesol dehydrogenase-like
LOC5571396	101405006	0.0340909	0.346737	7.81611	0.0735121	0.453854	0.3123	A630T	CT	2	RRTT	AaeL_AAEL009031, AAEL009031	forkhead box protein biniou
LOC5564220	147284811	0.371302	0.0487748	7.73787	0.468541	0.092659	0.330901	A186V	GA	2	UNK	AaeL_AAEL004177, AAEL004177	uncharacterized protein KIAA1841 homolog
LOC23687489	306693273	0.125744	0.491398	7.73486	0.204765	0.499866	0.387492	M130V	TC	2	UNK	AaeL_AAEL017069, AAEL017069	uncharacterized protein LOC23687489
LOC23687489	306693273	0.125744	0.491398	7.73486	0.204765	0.499866	0.387492	M130V	TC	2	UNK	AaeL_AAEL017069, AAEL017069	uncharacterized protein LOC23687489
LOC5567626	50163846	0.025641	0.323439	7.61279	0.0481634	0.43599	0.313629	P417S	GA	2	DIV	AaeL_AAEL006212, AAEL006212	TLR4 interactor with leucine rich repeats|protein artichoke|toll-like receptor 6
LOC5569212	57889651	0.02	0.31125	7.59406	0.0439338	0.42	0.304331	S308N	CT	2	RRTT		double-stranded RNA-binding protein Staufen homolog 2
LOC110677093	431790199	0.185408	0.592152	7.5905	0.323934	0.491061	0.473905	G522R	CGT	2	DIV		zinc finger protein 184-like
LOC5572891	35819971	0.0609739	0.387058	7.57059	0.130129	0.475309	0.350303	E47K	GA	2	DIV	AaeL_AAEL010099, AAEL010099	phosphoglycolate phosphatase 1B, chloroplastic
LOC5564245	146394896	0.614404	0.228491	7.56077	0.474102	0.354336	0.492908	F634L	AG	2	UNK		uncharacterized protein LOC5564245
LOC5574882	4516564	0.963235	0.658214	7.51165	0.0644444	0.447239	0.306465	M103T	GA	2	CSR	AaeL_AAEL011483, AAEL011483	general odorant-binding protein 66
LOC5570539	47705164	0.941619	0.619482	7.50633	0.10718	0.456388	0.297267	N1154I	AT	2	UNK	AaeL_AAEL001438, AAEL001438	uncharacterized protein LOC5570539
LOC5577731	323534570	0.264957	0.652754	7.50438	0.391111	0.453248	0.499948	Y5N	AT	2	LIPID	AaeL_AAEL013365, AAEL013365	lipase 1
LOC5571603	96609615	0.817544	0.443056	7.46263	0.328599	0.491064	0.473186	V625I	AG	2	DIV	AaeL_AAEL015129, AAEL009182, AAEL015129	zinc finger protein 184
LOC5572345	68914642	0.976923	0.689316	7.30799	0.0550018	0.431902	0.325217	S583A	CA	2	RRTT	AaeL_AAEL009738, AAEL009738	CCAAT/enhancer-binding protein zeta
LOC5579486	93209393	0.00793651	0.282051	7.25116	0.0114282	0.413728	0.154024	E6V	TAC	2	PROT	AaeL_AAEL015294, AAEL015294	chymotrypsin-2|salivary chymotrypsin-like enzyme
LOC5571212	340651010	0.287215	0.012931	7.2504	0.423241	0.0281633	0.247036	I28V	TC	2	UNK	AaeL_AAEL006905, AAEL006905	uncharacterized protein LOC5571212
LOC5576648	99052728	0.745151	1	7.18668	0.399326	0	0.25258	G293V	AC	2	Redox	AaeL_AAEL012674, AAEL012674	D-aspartate oxidase
LOC5568612	399164657	0.314868	0.696386	7.16614	0.420858	0.418704	0.497003	K132N	GT	2	RRTT	AaeL_AAEL006965, AAEL006965	nucleolar protein 58
LOC110677090	431682784	0.15702	0.515611	7.09657	0.287994	0.499973	0.469032	V304A	AG	2	DIV		zinc finger protein 90-like
LOC5567126	66353206	0.0322581	0.321574	7.08233	0.0776504	0.430665	0.257982	L362M	TA	2	DIV	AaeL_AAEL005879, AAEL005879	vinculin
LOC5564934	453112086	0.453527	0.818327	7.08204	0.497421	0.295065	0.4574	Q49R	CT	2	DIV	AaeL_AAEL004504, AAEL004504	probable serine hydrolase
LOC5572888	35810049	0.0698925	0.388514	7.08019	0.130015	0.475628	0.371984	L15I	GT	2	DIV	AaeL_AAEL010098, AAEL010098	phosphoglycolate phosphatase 2
LOC110677094	431781806	0.579864	0.909582	7.04894	0.492301	0.152778	0.413343	P413A	CG	2	DIV		zinc finger protein 62-like
LOC5574852	37356436	0.0323774	0.31908	7.00001	0.062435	0.426036	0.2922	E45K	CT	2	DIV	AaeL_AAEL011451, AAEL011451	LOW QUALITY PROTEIN: protein lethal(3)malignant blood neoplasm 1
LOC5578285	173266604	1	0.751796	6.99172	0	0.373361	0.241119	E229D	GC	2	SD	AaeL_AAEL013604, AAEL013604	sex-determining region Y protein
LOC5567626	50163854	0.027027	0.306667	6.9446	0.0525931	0.427598	0.317424	E414V	TA	2	DIV	AaeL_AAEL006212, AAEL006212	TLR4 interactor with leucine rich repeats|protein artichoke|toll-like receptor 6
LOC5569187	291636418	0.722789	0.348909	6.93892	0.405793	0.455389	0.495177	G1035V	TG	2	RRTT	AaeL_AAEL007449, AAEL007449	protein Gawky
LOC5574702	92300778	0.834767	0.479437	6.92008	0.270181	0.499682	0.447222	S252T	GC	2	DIV	AaeL_AAEL011343, AAEL011343	protocadherin Fat 3
LOC5571696	112779251	0.440584	0.109042	6.82134	0.4928	0.198245	0.401836	A294P	CG	2	RRTT	AaeL_AAEL006405, AAEL006405, AAEL009220	putative mediator of RNA polymerase II transcription subunit 12|uncharacterized protein LOC5571696
LOC5575665	465788853	0.433608	0.106863	6.70691	0.49014	0.214641	0.401447	S136N	GA	2	DIV	AaeL_AAEL002694, AAEL002694, AAEL801162	transmembrane protein 87A
LOC5575929	204070654	0.263124	0.0111111	6.65542	0.387447	0.0165278	0.246484	P57H	GT	2	DIV	AaeL_AAEL012176, AAEL012176	gastrula zinc finger protein XlCGF53.1
LOC5577275	338405234	0	0.236424	6.64927	0	0.361496	0.170452	E96K	GA	2	DIV	AaeL_AAEL013118, AAEL013118	protein G12
LOC5576412	76134315	0.671738	0.956502	6.64501	0.435656	0.0838082	0.317447	K34E	CT	2	RRTT	AaeL_AAEL012514, AAEL012514	translation initiation factor eIF-2B subunit delta
LOC5570361	37100589	0.8002	0.445829	6.63175	0.32	0.493827	0.456061	L5I	TG	2	DIV	AaeL_AAEL008268, AAEL008268, AAEL011443, AAEL011457	alpha-tocopherol transfer protein-like|retinaldehyde-binding protein 1
LOC5564245	146395949	0.265704	0.628888	6.61893	0.391111	0.469054	0.492115	T283A	TC	2	UNK		uncharacterized protein LOC5564245
LOC5579471	352695378	0.643039	0.93976	6.61644	0.453816	0.118818	0.303361	P881L	AG	2	DIV	AaeL_AAEL013698, AAEL013697, AAEL013698, AAEL013699	LOW QUALITY PROTEIN: restin homolog
LOC5572287	165743497	0.105698	0.427716	6.58152	0.189835	0.489226	0.388148	S147P	AG	2	TRP	AaeL_AAEL001752, AAEL001752	LOW QUALITY PROTEIN: H(+)/Cl(-) exchange transporter 5
LOC5579471	352695384	0.646157	0.940784	6.57582	0.453816	0.112552	0.295619	*879W	CT	2	DIV	AaeL_AAEL013698, AAEL013697, AAEL013698, AAEL013699	LOW QUALITY PROTEIN: restin homolog
LOC5570361	37100585	0.786525	0.431506	6.57146	0.335862	0.490531	0.46554	P6L	AG	2	DIV	AaeL_AAEL008268, AAEL008268, AAEL011443, AAEL011457	alpha-tocopherol transfer protein-like|retinaldehyde-binding protein 1
LOC5574383	231967100	0.512363	0.168668	6.53444	0.49639	0.294233	0.477453	A281D	CA	2	MET	AaeL_AAEL011102, AAEL011102	lysosomal-associated transmembrane protein 4B
LOC5575913	27239102	0.0612348	0.355856	6.53303	0.124444	0.456353	0.329314	N13D	AG	2	PROT	AaeL_AAEL012157, AAEL012157	endoplasmic reticulum metallopeptidase 1
LOC5564245	146395656	0.978261	1	6.5144	0.514486	0.305161	0.494172	E380D	GAT	2	UNK		uncharacterized protein LOC5564245
LOC5568622	398747953	0.0358696	0.309501	6.51272	0.0702582	0.417735	0.239388	S296I	CA	2	UNK	AaeL_AAEL006968, AAEL006968	uncharacterized protein LOC5568622
LOC5577731	323534562	0.3125	0.673663	6.48757	0.432133	0.436446	0.497684	T2K	AC	2	LIPID	AaeL_AAEL013365, AAEL013365	lipase 1
LOC5576943	62812177	0.460173	0.131022	6.47029	0.496172	0.225454	0.42344	G2912S	GA	2	DIV	AaeL_AAEL012888, AAEL012888, AAEL012889, AAEL012890	sorbin and SH3 domain-containing protein 1|uncharacterized protein LOC5576943
LOC5575900	232494025	0.71672	0.35708	6.46893	0.406028	0.456747	0.495766	N400H	GT	2	DIV	AaeL_AAEL012146, AAEL012146	ubiquitin carboxyl-terminal hydrolase 35|ubiquitin carboxyl-terminal hydrolase 38
LOC5577605	366556230	0.753606	0.397436	6.45855	0.362812	0.483471	0.48675	T7A	GA	2	CYT/STR	AaeL_AAEL003274, AAEL003274	cuticle protein CP14.6
LOC5571701	112640824	0.682508	0.322256	6.45701	0.428147	0.437045	0.499578	T15I	AG	2	MIT	AaeL_AAEL009225, AAEL009225	ribosome-recycling factor, mitochondrial
LOC5569876	431610639	0.715461	0.356487	6.44569	0.418424	0.457619	0.490476	G617E	AG	2	DIV	AaeL_AAEL007974, AAEL007974	zinc finger protein 791
LOC5570426	273867333	0.770979	1	6.43607	0.353299	0	0.171011	S410G	GA	2	DIV	AaeL_AAEL008325, AAEL008325	cilia- and flagella-associated protein 206
LOC5563747	121154109	1	0.773454	6.36513	0	0.353506	0.216891	S712A	GT	2	DIV	AaeL_AAEL014093, AAEL014093, AAEL014097	TBC1 domain family member 9
LOC5572345	68914738	0.907827	0.590789	6.34565	0.238578	0.482531	0.424239	E551Q	GCT	2	RRTT	AaeL_AAEL009738, AAEL009738	CCAAT/enhancer-binding protein zeta
LOC5574366	235308346	0.421027	0.106723	6.3381	0.487535	0.190329	0.414525	E1051D	TA	2	UNK	AaeL_AAEL011083, AAEL011083, AAEL801160	uncharacterized protein LOC5574366
LOC5572439	374872674	0.494108	0.830899	6.32382	0.49964	0.289235	0.45017	Q127K	AC	2	MET	AaeL_AAEL001822, AAEL001822	UDP-glucuronosyltransferase 2B7
LOC5573930	429277504	0.524257	0.85352	6.30745	0.497041	0.24623	0.428224	N753H	GT	2	LIPID		fatty acid synthase
LOC5579471	352695285	0.608353	0.911998	6.30623	0.468345	0.167244	0.327441	Q912R	CT	2	DIV	AaeL_AAEL013698, AAEL013697, AAEL013698, AAEL013699	LOW QUALITY PROTEIN: restin homolog
LOC5567126	66353090	0.527599	0.187527	6.2805	0.499826	0.308865	0.447911	S323L	CT	2	DIV	AaeL_AAEL005879, AAEL005879	vinculin
LOC5573478	25990270	0.023489	0.275564	6.23787	0.0456893	0.396235	0.256394	H5Q	CA	2	DIV	AaeL_AAEL010520, AAEL010520	nodal modulator 1
LOC5569876	431610928	0.184359	0.522222	6.23734	0.304052	0.497355	0.456151	R691H	GA	2	DIV	AaeL_AAEL007974, AAEL007974	zinc finger protein 791
LOC5567088	102775791	0.427899	0.113865	6.23394	0.490921	0.198819	0.399974	S1071C	TA	2	CYT/STR	AaeL_AAEL012315, AAEL012315	LOW QUALITY PROTEIN: centrosomal protein of 290 kDa
LOC5569762	474135533	0.221624	0	6.22455	0.358239	0	0.208795	D2494E	AT	2	UNK		uncharacterized protein LOC5569762|uncharacterized protein PFB0145c
LOC5578059	199130216	0.0590591	0.341176	6.2103	0.117188	0.451172	0.32373	Q55*	CT	2	DIV		NTF2-related export protein
LOC5573660	98256239	0.0263158	0.27866	6.15966	0.0590585	0.403817	0.275156	L975M	TA	2	RRTT	AaeL_AAEL010646, AAEL010646, AAEL010648	protein dead ringer
LOC5571294	20968855	0.259878	0.0178571	6.12692	0.378311	0.0363512	0.262003	S1419N	CT	2	DIV	AaeL_AAEL001582, AAEL001582	kinesin-like protein KIF13A
LOC5572859	200546773	0.406664	0.101997	6.12272	0.482269	0.186834	0.375787	S756N	CT	2	RRTT	AaeL_AAEL010080, AAEL010080	origin recognition complex subunit 1
LOC5566287	53289212	0.846919	0.521761	6.12262	0.243194	0.497778	0.404036	E202K	TC	2	DIV	AaeL_AAEL000726, AAEL000726	fibrinogen-like protein A
LOC5575511	396219858	0.96748	0.711003	6.10154	0.080261	0.416584	0.289714	K203N	GT	2	DIV	AaeL_AAEL011887, AAEL011887	zinc finger protein 79
LOC5571261	22896622	0.217105	0	6.0961	0.339941	0	0.162866	K942E	TC	2	DIV	AaeL_AAEL001545, AAEL001545, AAEL001585	zinc finger protein 91
LOC5578050	23609271	0.835063	0.507277	6.09321	0.272699	0.499666	0.439874	V173A	GA	2	UNK	AaeL_AAEL013484, AAEL013484	uncharacterized protein LOC5578050
LOC5566287	53289220	0.84958	0.526486	6.0877	0.243194	0.497396	0.408163	T199K	TG	2	DIV	AaeL_AAEL000726, AAEL000726	fibrinogen-like protein A
LOC110677093	431799254	0.277071	0.608017	6.07388	0.438323	0.654778	0.580926	I88M	TAC	2	DIV		zinc finger protein 184-like
LOC5575900	232520526	0	0.215135	6.04026	0	0.328181	0.168349	A65G	GC	2	DIV	AaeL_AAEL012146, AAEL012146	ubiquitin carboxyl-terminal hydrolase 35|ubiquitin carboxyl-terminal hydrolase 38
LOC5572345	68914727	0.920139	0.630407	6.0367	0.148681	0.463446	0.384956	K554N	AC	2	RRTT	AaeL_AAEL009738, AAEL009738	CCAAT/enhancer-binding protein zeta
LOC5572350	68577527	0.684474	0.338683	5.99976	0.42049	0.447138	0.499323	F354L	GT	2	DIV	AaeL_AAEL009737, AAEL009737	tectonic
LOC5579471	352695393	0.654821	0.93422	5.99552	0.449658	0.12234	0.300623	S876L	AG	2	DIV	AaeL_AAEL013698, AAEL013697, AAEL013698, AAEL013699	LOW QUALITY PROTEIN: restin homolog
LOC5564245	146396049	0.260997	0.603175	5.98402	0.387812	0.478096	0.471353	F249L	GT	2	UNK		uncharacterized protein LOC5564245
LOC5575157	369539486	0.780121	0.443613	5.98034	0.349636	0.493562	0.46905	I403T	CT	2	DIV	AaeL_AAEL000382, AAEL000382	cilia- and flagella-associated protein 91
LOC5572887	35551608	0.0596408	0.333353	5.95427	0.104088	0.444843	0.309735	D109N	CT	2	DIV	AaeL_AAEL015405, AAEL015405	zinc finger protein 425
LOC5571188	127230614	0.418018	0.114031	5.94028	0.487535	0.208118	0.390933	C441S	CG	2	DIV	AaeL_AAEL008879, AAEL008879, AAEL012757, KMO_AEDAE, kh	kynurenine 3-monooxygenase|Kynurenine 3-hydroxylase|kynurenine monooxygenase|mutant kynurenine monooxygenase
LOC5571396	101405024	0.0234375	0.263889	5.90298	0.0461281	0.396131	0.264612	L624M	GT	2	RRTT	AaeL_AAEL009031, AAEL009031	forkhead box protein biniou
LOC5565392	288617520	0.209795	0	5.88942	0.329112	0	0.170452	I170V	AG	2	CYT/STR	AaeL_AAEL004749, AAEL004749	cuticle protein 8
LOC5576676	94097130	0.455245	0.142608	5.86267	0.498232	0.24716	0.427487	E580Q	CG	2	TRP	AaeL_AAEL012698, AAEL012698	ATP-binding cassette sub-family A member 3
LOC5577707	135740291	0.946741	0.681134	5.85632	0.10116	0.435054	0.335738	L129I	AC	2	DIV	AaeL_AAEL013350, AAEL013350	protein lethal(2)essential for life|heat shock protein
LOC5573080	359584900	0.383623	0.722729	5.84958	0.472439	0.409331	0.496822	I1131V	CT	2	DIV	AaeL_AAEL010266, AAEL010266	extracellular matrix protein A|uncharacterized protein LOC5573080
LOC5571603	96609392	0.471242	0.660951	5.82708	0.615131	0.563767	0.635283	L550F	ACT	2	DIV	AaeL_AAEL015129, AAEL009182, AAEL015129	zinc finger protein 184
LOC5569441	372029335	0.185551	0.509381	5.81881	0.300015	0.499997	0.452631	D833E	TA	2	DIV	AaeL_AAEL001238, AAEL001238	HEAT repeat-containing protein 1 homolog
LOC5563747	121154128	1	0.792857	5.81478	0	0.329861	0.191567	C718Y	AG	2	DIV	AaeL_AAEL014093, AAEL014093, AAEL014097	TBC1 domain family member 9
LOC5568797	421160674	0.0342857	0.282397	5.8121	0.0728438	0.384595	0.243873	R554K	CT	2	DIV	AaeL_AAEL007144, AAEL007144	LOW QUALITY PROTEIN: kelch-like protein 10
LOC5579471	352695279	0.626692	0.912478	5.79713	0.466129	0.16249	0.323989	Q914R	CT	2	DIV	AaeL_AAEL013698, AAEL013697, AAEL013698, AAEL013699	LOW QUALITY PROTEIN: restin homolog
LOC5572935	380331878	0.26675	0.0271739	5.76608	0.391111	0.0436464	0.220194	M130T	TC	2	Redox	AaeL_AAEL010157, AAEL010157	microsomal glutathione S-transferase 1
LOC5575246	105626139	0.0912169	0.377918	5.76572	0.169922	0.471741	0.36472	N592T	TG	2	DIV	AaeL_AAEL011707, AAEL011707	zinc finger protein Xfin
LOC5567142	65543265	0	0.203815	5.72139	0	0.333742	0.160752	A807D	GT	2	PROT	AaeL_AAEL005874, AAEL005874, AAEL005881	E3 ubiquitin-protein ligase AMFR
LOC5573913	429075334	0.0353535	0.28053	5.69984	0.102638	0.403629	0.296334	A75T	CT	2	CYT/STR	AaeL_AAEL002191, AAEL002191	adult cuticle protein 1
LOC5574284	63396161	0.243437	0.57331	5.68188	0.37197	0.491035	0.484307	I249T	AG	2	DIV	AaeL_AAEL011053, AAEL011053	GDNF-inducible zinc finger protein 1
LOC5568315	83930734	0.656023	0.320616	5.68017	0.456333	0.432383	0.49595	N1144H	AC	2	UNK	AaeL_AAEL006754, AAEL006754	uncharacterized protein LOC5568315
LOC5577275	338405123	0.0140845	0.236038	5.67995	0.0266618	0.336735	0.18	Q59*	CT	2	DIV	AaeL_AAEL013118, AAEL013118	protein G12
LOC5568888	318524904	0.3683	0.702907	5.67896	0.466042	0.416098	0.497148	I24L	GT	2	MIT	AaeL_AAEL007196, AAEL007196	m-AAA protease-interacting protein 1, mitochondrial|juvenile hormone esterase-binding protein
LOC5578230	100317019	0.715217	0.381704	5.6678	0.422091	0.47355	0.499209	V807G	GT	2	TRP	AaeL_AAEL013848, AAEL013848, AAEL013854	probable multidrug resistance-associated protein lethal(2)03659
LOC5573936	429635065	0.245943	0.575101	5.65171	0.378703	0.492265	0.492511	K114R	TC	2	DIV	AaeL_AAEL002235, AAEL002235	SUN domain-containing ossification factor|SUN domain-containing protein 2
LOC5569161	134847330	0.201299	0	5.65095	0.317491	0	0.1817	K848E	AG	2	RRTT	AaeL_AAEL007417, AAEL007417	activating transcription factor 7-interacting protein 1
LOC5568315	83930966	0.553494	0.227447	5.63974	0.4975	0.349636	0.444444	S1221N	GA	2	UNK	AaeL_AAEL006754, AAEL006754	uncharacterized protein LOC5568315
LOC5566236	69159963	0.0821593	0.358794	5.62399	0.137696	0.456954	0.305641	A205S	GT	2	MIT	AaeL_AAEL005269, AAEL005269	cytochrome b-c1 complex subunit 2, mitochondrial
LOC5571820	86650662	0	0.200159	5.61912	0	0.316604	0.196168	M435I	GA	2	TRP	AaeL_AAEL001697, AAEL001697	proton-coupled folate transporter
LOC5577731	323535519	0.355069	0.0801034	5.61086	0.457025	0.139551	0.349405	K302Q	AC	2	LIPID	AaeL_AAEL013365, AAEL013365	lipase 1
LOC5569383	343941288	0.20835	0.00378788	5.57938	0.3318	0.00888871	0.18226	I285V	AG	2	DIV		LOW QUALITY PROTEIN: protein arginine N-methyltransferase 5
LOC5576054	332006589	0.313995	0.645847	5.57812	0.435639	0.456311	0.5	I314V	CT	2	DIV	AaeL_AAEL013952, AAEL013952	prohibitin-2
LOC5569383	343941427	0.198566	0	5.57464	0.322544	0	0.184604	P331L	CT	2	DIV		LOW QUALITY PROTEIN: protein arginine N-methyltransferase 5
LOC5567997	438644313	0.446861	0.77069	5.56776	0.491588	0.346512	0.491317	K518E	CT	2	DIV	AaeL_AAEL006438, AAEL006438	probable dolichyl pyrophosphate Man9GlcNAc2 alpha-1,3-glucosyltransferase
LOC5567333	471845554	0.254524	0.0247934	5.55577	0.379109	0.0552548	0.230112	K785N	CA	2	UNK	AaeL_AAEL006004, AAEL006004	uncharacterized protein LOC5567333
LOC23687880	432577306	0.0819398	0.355919	5.55282	0.152778	0.465016	0.401017	Q66K	GT	2	DIV	AaeL_AAEL017460, AAEL017460	angiotensin-converting enzyme
LOC5573256	404419926	0.366468	0.0888023	5.54758	0.462304	0.184412	0.367594	N32D	TC	2	UNK	AaeL_AAEL010338, AAEL010338	uncharacterized protein LOC5573256
LOC5563747	121154132	1	0.803309	5.52241	0	0.317925	0.182111	E719D	TA	2	DIV	AaeL_AAEL014093, AAEL014093, AAEL014097	TBC1 domain family member 9
LOC5565768	281432417	0.143929	0.444996	5.5224	0.246402	0.493931	0.406708	V124M	CT	2	DIV	AaeL_AAEL004975, AAEL004975	zinc finger protein 250
LOC5566251	335133666	0.791095	0.995146	5.52123	0.336574	0.00865784	0.202858	T483S	CG	2	PROT	AaeL_AAEL015110, AAEL015110	venom dipeptidyl peptidase 4
LOC5577114	321471272	0.09758	0.378619	5.51221	0.158559	0.469676	0.344397	P1458T	CA	2	DIV	AaeL_AAEL013012, AAEL013012	brefeldin A-inhibited guanine nucleotide-exchange protein 1
LOC5573506	366936680	0.196154	0	5.50745	0.316345	0	0.125641	A112V	CT	2	RRTT	AaeL_AAEL010545, AAEL003263, AAEL010545	protein vestigial
LOC5569525	470687506	0.265851	0.592158	5.50405	0.389928	0.482959	0.475813	T20P	AC	2	TRP	AaeL_AAEL007709, AAEL007709, GPRGBB3	gamma-aminobutyric acid type B receptor subunit 2
LOC5579471	352694796	0.323609	0.0633012	5.49962	0.439718	0.117188	0.304688	P1075H	GT	2	DIV	AaeL_AAEL013698, AAEL013697, AAEL013698, AAEL013699	LOW QUALITY PROTEIN: restin homolog
LOC5574363	235619580	0.0678097	0.331025	5.49607	0.136657	0.433884	0.320944	G262C	GT	2	DIV	AaeL_AAEL011081, AAEL011081, AAEL801156	HD domain-containing protein 2
LOC5579486	93209225	0.89479	0.61085	5.48811	0.184689	0.465112	0.312175	S62I	AC	2	PROT	AaeL_AAEL015294, AAEL015294	chymotrypsin-2|salivary chymotrypsin-like enzyme
LOC5573501	315000065	0.142857	0.442222	5.48548	0.244898	0.493382	0.426903	S3134C	CG	2	MET		maltase 1
LOC5578050	23609259	0.792125	0.476027	5.45839	0.328339	0.498179	0.461166	S177L	AG	2	UNK	AaeL_AAEL013484, AAEL013484	uncharacterized protein LOC5578050
LOC5569020	150529615	0.696691	0.369637	5.44836	0.42	0.465642	0.497949	V367I	TC	2	UNK	AaeL_AAEL010188, AAEL007311, AAEL010188	uncharacterized protein LOC5569020
LOC5571533	419194639	0.689268	0.363939	5.38957	0.429389	0.46281	0.499996	S409G	AG	2	Redox	AaeL_AAEL009122, AAEL009122	cytochrome P450 (CYP6N15)
LOC5566251	335133667	0.795855	0.995146	5.38797	0.328813	0.00867662	0.197887	G483S	TC	2	PROT	AaeL_AAEL015110, AAEL015110	venom dipeptidyl peptidase 4
LOC5569149	11607504	0.0196078	0.237638	5.38483	0.0285654	0.362812	0.246145	S290G	AG	2	DIV	AaeL_AAEL007412, AAEL007412	acid sphingomyelinase-like phosphodiesterase 3b
LOC110677232	468874207	0.311389	0.0588697	5.36843	0.429077	0.120306	0.312578	K527R	AG	2	UNK		uncharacterized protein LOC110677232
LOC5564245	146394952	0.619079	0.295204	5.36836	0.471364	0.416322	0.497196	G615D	CT	2	UNK		uncharacterized protein LOC5564245
LOC5564217	147474250	0.594662	0.88063	5.36704	0.483063	0.222725	0.391586	S70G	GA	2	DIV	AaeL_AAEL004158, AAEL004158, AAEL004194	protein prune homolog 2
LOC5575763	14407496	0.0049505	0.202099	5.32431	0.0127383	0.279267	0.155958	Q381K	GT	2	DIV	AaeL_AAEL002699, AAEL002699, SRPN7	neuroserpin
LOC5570386	67628247	0.712963	0.953504	5.29701	0.401235	0.110727	0.226147	I34V	CT	2	CYT/STR	AaeL_AAEL008284, AAEL008284	cuticle protein CP14.6
LOC5574852	37355786	0.735554	0.416726	5.2955	0.405338	0.486814	0.488261	W132G	CA	2	DIV	AaeL_AAEL011451, AAEL011451	LOW QUALITY PROTEIN: protein lethal(3)malignant blood neoplasm 1
LOC5564245	146394893	0.396293	0.716734	5.29309	0.479456	0.409164	0.49668	F635L	GA	2	UNK		uncharacterized protein LOC5564245
LOC5568888	318524894	0.347527	0.669713	5.28508	0.453072	0.441596	0.499995	N27S	CT	2	MIT	AaeL_AAEL007196, AAEL007196	m-AAA protease-interacting protein 1, mitochondrial|juvenile hormone esterase-binding protein
LOC5573277	182603690	0.979167	0.779838	5.27641	0.0395096	0.411354	0.248161	E775D	TAG	2	TRP	AaeL_AAEL010379, AAEL010379	multidrug resistance protein homolog 49
LOC5564245	146395910	0.291667	0.611871	5.26962	0.402682	0.469963	0.495194	K296E	TC	2	UNK		uncharacterized protein LOC5564245
LOC5565894	459280525	0.187263	0	5.26102	0.297521	0	0.15099	I1167V	AG	2	DIV	AaeL_AAEL000693, AAEL000693, TOR	target of rapamycin
LOC5576943	62810099	0.37743	0.103347	5.24034	0.471655	0.195035	0.363414	Q2244R	AG	2	DIV	AaeL_AAEL012888, AAEL012888, AAEL012889, AAEL012890	sorbin and SH3 domain-containing protein 1|uncharacterized protein LOC5576943
LOC5564245	146395990	0.288432	0.607266	5.23692	0.411357	0.479474	0.485447	L269Q	AT	2	UNK		uncharacterized protein LOC5564245
LOC5564930	451316442	0.015625	0.223737	5.23682	0.0296669	0.33925	0.194471	L7V	GC	2	PROT	AaeL_AAEL004505, AAEL004505	chymotrypsin
LOC5567635	49107786	0.802436	0.496852	5.22768	0.335219	0.499901	0.460224	A998T	TC	2	DIV	AaeL_AAEL006211, AAEL006211	tonsoku-like protein
LOC5579056	102115649	0.325848	0.645903	5.2253	0.441422	0.464899	0.497173	L163P	TC	2	DIV	AaeL_AAEL013996, AAEL013996	zinc finger protein 624
LOC5569161	134847249	0.214788	0	5.22521	0.344959	0	0.182841	Q821K	CAG	2	RRTT	AaeL_AAEL007417, AAEL007417	activating transcription factor 7-interacting protein 1
LOC5565864	337751096	0.62424	0.305483	5.20684	0.469256	0.423795	0.497759	M147L	TG	2	MET	AaeL_AAEL015002, AAEL015002	aldo-keto reductase
LOC5565864	337751096	0.62424	0.305483	5.20684	0.469256	0.423795	0.497759	M147L	TG	2	MET	AaeL_AAEL015002, AAEL015002	aldo-keto reductase
LOC5571603	96609628	0.371978	0.0878952	5.20477	0.453832	0.139798	0.338393	R629K	GAC	2	DIV	AaeL_AAEL015129, AAEL009182, AAEL015129	zinc finger protein 184
LOC5572057	441770006	0.814831	1	5.20325	0.290178	0	0.178302	D430E	GC	2	DIV	AaeL_AAEL001729, AAEL001729	gastrulation defective protein 1 homolog
LOC5576948	251999450	0.0899674	0.354727	5.17234	0.164193	0.471466	0.327105	L638P	AG	2	UNK	AaeL_AAEL012905, AAEL012905, AAEL012908, AAEL012909, AAEL012910	LOW QUALITY PROTEIN: uncharacterized protein LOC5576948
LOC5576975	213390063	0.0715278	0.325322	5.16744	0.134743	0.437613	0.305943	K701E	TC	2	DIV	AaeL_AAEL003071, AAEL003071	pseudouridylate synthase 7 homolog
LOC5566332	63508740	0.35761	0.0919631	5.1674	0.462116	0.166089	0.331113	D5421E	AC	2	CYT/STR	AaeL_AAEL005324, AAEL005324, AAEL005338	titin
LOC5569877	431589793	0.174797	0.472222	5.15883	0.288486	0.498671	0.425362	E269D	GT	2	DIV	AaeL_AAEL007970, AAEL007970	zinc finger protein 34
LOC5568183	463291700	0.18348	0	5.15671	0.286866	0	0.177002	S20F	GA	2	DIV	AaeL_AAEL006601, AAEL006601	alpha-sarcoglycan|epsilon-sarcoglycan
LOC5568620	398767815	0.133306	0.417041	5.15224	0.235781	0.485659	0.393969	R127K	GA	2	UNK	AaeL_AAEL006964, AAEL006964	uncharacterized protein LOC5568620
LOC5571259	22907246	0.533431	0.225245	5.14972	0.499863	0.333351	0.457756	R380K	CT	2	DIV	AaeL_AAEL001595, AAEL001595	zinc finger protein 880
LOC5569149	11607517	0.0317718	0.252071	5.13778	0.0571155	0.375	0.266452	G294A	GCI	2	DIV	AaeL_AAEL007412, AAEL007412	acid sphingomyelinase-like phosphodiesterase 3b
LOC5576054	332006595	0.353139	0.67017	5.13663	0.459481	0.442963	0.499132	A312S	AC	2	DIV	AaeL_AAEL013952, AAEL013952	prohibitin-2
LOC5564245	146394769	0.541367	0.232686	5.12965	0.496451	0.355343	0.475446	Y676C	TC	2	UNK		uncharacterized protein LOC5564245
LOC5574877	4493078	0.30407	0.619886	5.12555	0.42379	0.471866	0.49228	M143I	CT	2	CSR	AaeL_AAEL011486, AAEL011486	general odorant-binding protein 66
LOC5571605	97679551	0.10613	0.376875	5.11298	0.196259	0.458828	0.346661	E16Q	CG	2	RRTT	AaeL_AAEL009191, AAEL009191	LOW QUALITY PROTEIN: adenosine deaminase-like protein
LOC5566287	53289223	0.825627	0.530021	5.11265	0.266528	0.496668	0.41478	V198A	GA	2	DIV	AaeL_AAEL000726, AAEL000726	fibrinogen-like protein A
LOC5565914	458163631	0.235007	0.0231424	5.10303	0.357991	0.0478753	0.226648	S148P	TC	2	DIV	AaeL_AAEL000690, AAEL000690	inactive hydroxysteroid dehydrogenase-like protein 1|putative 17-beta-hydroxysteroid dehydrogenase
LOC5569243	223930555	0.027027	0.242669	5.09503	0.0519111	0.3648	0.231111	Q420L	TA	2	RRTT	AaeL_AAEL007505, AAEL007505	homeobox protein araucan
LOC5573080	359584902	0.440962	0.750648	5.09108	0.49259	0.385063	0.485295	D1130A	GT	2	DIV	AaeL_AAEL010266, AAEL010266	extracellular matrix protein A|uncharacterized protein LOC5573080
LOC5568187	463523447	0.265591	0.0391414	5.07752	0.387812	0.0824911	0.226508	S617P	AG	2	DIV	AaeL_AAEL006615, AAEL006615	zinc finger protein 420
LOC5569381	344249018	0.195934	0.00617284	5.07008	0.305161	0.0124995	0.178022	G194S	CT	2	PROT	AaeL_AAEL007582, AAEL007582	trypsin 3A1-like
LOC5575246	105626148	0.11387	0.386531	5.06888	0.198245	0.478058	0.381479	F589S	AG	2	DIV	AaeL_AAEL011707, AAEL011707	zinc finger protein Xfin
LOC5574509	105048903	0.246693	0.55479	5.05733	0.392623	0.49399	0.482104	F236V	TG	2	MET	AaeL_AAEL015107, AAEL015107	glycosylphosphatidylinositol anchor biosynthesis protein 11
LOC5564628	65265681	0.263709	0.573106	5.03582	0.397744	0.493416	0.479131	V14A	AG	2	RRTT	AaeL_AAEL014550, AAEL014550	homeobox protein PKNOX1
LOC5573660	98256242	0.769697	0.465085	5.02931	0.3542	0.493286	0.482503	S976G	GA	2	RRTT	AaeL_AAEL010646, AAEL010646, AAEL010648	protein dead ringer
LOC110676900	366086386	0	0.178623	5.02332	0	0.286578	0.170657	R3P	GC	2	UNK		uncharacterized protein LOC110676900
LOC5569762	474122511	0	0.177905	5.00367	0	0.293542	0.153272	I5367T	AG	2	UNK		uncharacterized protein LOC5569762|uncharacterized protein PFB0145c
LOC5580033	402987544	0.0628956	0.304849	4.99867	0.11776	0.409294	0.246261	T23S	AT	2	UNK	AaeL_AAEL010229, AAEL010229	uncharacterized protein LOC5580033
LOC5571540	419111820	0.27381	0.0458098	4.96509	0.382793	0.0862027	0.237223	K340T	TG	2	Redox	AaeL_AAEL009127, AAEL009127, CYP6M11	cytochrome P450 (CYP9M11)
LOC5568612	399164468	0.763636	0.973684	4.96005	0.351	0.0713306	0.257857	K69N	TG	2	RRTT	AaeL_AAEL006965, AAEL006965	nucleolar protein 58
LOC5573922	429131814	0.366344	0.103175	4.94649	0.46401	0.183257	0.366001	L8I	CA	2	DIV	AaeL_AAEL002202, AAEL002202	glycine-rich protein
LOC5572910	161737542	0.821542	0.531106	4.94433	0.279909	0.497831	0.421063	G3A	CG	2	CSR	AaeL_AAEL010128, AAEL010128	protein artichoke
LOC5568173	462885586	0.24159	0.544521	4.93675	0.355713	0.495981	0.4543	V279I	GA	2	UNK	AaeL_AAEL006607, AAEL006607	uncharacterized protein LOC5568173
LOC110677094	431781818	0.175325	0	4.93306	0.293367	0	0.198302	Q409*	GA	2	DIV		zinc finger protein 62-like
LOC5575907	27254231	0.276983	0.0483054	4.92883	0.398901	0.0976003	0.270049	G369A	GC	2	PROT	AaeL_AAEL012153, AAEL012153	endoplasmic reticulum metallopeptidase 1
LOC5578867	197918996	1	0.825573	4.90855	0	0.289085	0.179531	K438N	AT	2	CYT/STR	AaeL_AAEL003737, AAEL003737	uncharacterized protein LOC5578867
LOC5577555	62222344	0.541231	0.23986	4.90169	0.497538	0.368257	0.47063	F94Y	AT	2	UNK	AaeL_AAEL013267, AAEL013267	uncharacterized protein LOC5577555
LOC5572887	35551334	0.0665992	0.307328	4.89767	0.116701	0.427966	0.318071	G200D	CT	2	DIV	AaeL_AAEL015405, AAEL015405	zinc finger protein 425
LOC5574085	31525906	0	0.173852	4.89284	0	0.285375	0.170879	A1037V	GA	2	TRP	AaeL_AAEL002260, AAEL002260	trafficking protein particle complex subunit 11
LOC5568931	421630764	0.971926	0.762605	4.8907	0.053789	0.364252	0.214765	G467D	AG	2	DIV	AaeL_AAEL007244, AAEL007244	zinc finger protein 2 homolog
LOC5569441	372029360	0.176727	0.46464	4.88956	0.290657	0.497203	0.43544	R842G	AG	2	DIV	AaeL_AAEL001238, AAEL001238	HEAT repeat-containing protein 1 homolog
LOC5574513	345865474	0.67456	0.92186	4.88017	0.457561	0.1609	0.386272	T26A	CT	2	DIV	AaeL_AAEL011186, AAEL011186	transmembrane protein 231
LOC5568490	339167490	0.173332	0	4.87863	0.283165	0	0.164648	G190E	CT	2	PROT	AaeL_AAEL006903, AAEL006903	trypsin-7
LOC5566977	437283152	0.0120482	0.202819	4.87827	0.0261392	0.322416	0.160512	G23S	CT	2	IMM	AaeL_AAEL005739, AAEL005739	chaoptin
LOC5568174	462898491	0.0240385	0.228698	4.87682	0.0512465	0.359319	0.18782	Q372E	CG	2	UNK	AaeL_AAEL006630, AAEL006630	uncharacterized protein LOC5568174
LOC23687757	186926238	0.797059	0.987805	4.87241	0.32373	0.0294052	0.190898	E179D	AT	2	MET	AaeL_AAEL017337, AAEL017337, AAEL017396	alcohol dehydrogenase 1
LOC5576948	251994937	0.0788041	0.326011	4.86705	0.144931	0.442681	0.313847	H2100Q	GC	2	UNK	AaeL_AAEL012905, AAEL012905, AAEL012908, AAEL012909, AAEL012910	LOW QUALITY PROTEIN: uncharacterized protein LOC5576948
LOC110677094	431781817	0.172348	0	4.85182	0.287335	0	0.198334	Q409P	TG	2	DIV		zinc finger protein 62-like
LOC5575748	422949857	0.171726	0	4.83485	0.281082	0	0.152778	C678G	TG	2	UNK	AaeL_AAEL012057, AAEL012057	uncharacterized protein LOC5575748
LOC5572940	380688535	0.239512	0.0306122	4.81032	0.363693	0.0603441	0.214731	S640L	CT	2	RRTT	AaeL_AAEL010153, AAEL010153	protein bicaudal C
LOC5568621	398758811	0.428763	0.730159	4.80136	0.49107	0.405673	0.490568	P90A	CG	2	UNK	AaeL_AAEL006969, AAEL006969	uncharacterized protein LOC5568621
LOC5565768	281432667	0.0223464	0.222376	4.79927	0.0480189	0.350525	0.207762	E40D	CA	2	DIV	AaeL_AAEL004975, AAEL004975	zinc finger protein 250
LOC5568620	398768066	0.0745908	0.316458	4.79157	0.131825	0.429044	0.30839	D190E	CA	2	UNK	AaeL_AAEL006964, AAEL006964	uncharacterized protein LOC5568620
LOC5576412	76134143	0.266711	0.0454174	4.79046	0.389607	0.0810142	0.277182	P91L	GA	2	RRTT	AaeL_AAEL012514, AAEL012514	translation initiation factor eIF-2B subunit delta
LOC5564245	146394973	0.331232	0.635569	4.77996	0.444444	0.464194	0.497323	A608V	GA	2	UNK		uncharacterized protein LOC5564245
LOC5576054	332006570	0.346899	0.651261	4.776	0.453369	0.46106	0.499961	D320A	TG	2	DIV	AaeL_AAEL013952, AAEL013952	prohibitin-2
LOC5566295	51801829	0	0.168996	4.76054	0	0.279552	0.143457	Q528H	CA	2	UNK	AaeL_AAEL000736, AAEL000736, AAEL000742	uncharacterized protein LOC5566295
LOC5577210	337829573	0.303718	0.0681818	4.72985	0.401235	0.127066	0.239499	R40T	CG	2	DIV	AaeL_AAEL013088, AAEL013088	zinc finger matrin-type protein 5
LOC5576412	76134106	0.278512	0.0533274	4.72892	0.395671	0.105977	0.298526	E103D	TA	2	RRTT	AaeL_AAEL012514, AAEL012514	translation initiation factor eIF-2B subunit delta
LOC5570507	45729546	0.0287172	0.232651	4.72514	0.0635676	0.357131	0.248648	T403I	GA	2	DIV	AaeL_AAEL001397, AAEL001397	DIS3-like exonuclease 2
LOC5579471	352693899	0.70543	0.936598	4.69743	0.416098	0.122423	0.271546	V1374A	GA	2	DIV	AaeL_AAEL013698, AAEL013697, AAEL013698, AAEL013699	LOW QUALITY PROTEIN: restin homolog
LOC5566251	335133790	0.833489	1	4.69303	0.276274	0	0.158029	N442D	CT	2	PROT	AaeL_AAEL015110, AAEL015110	venom dipeptidyl peptidase 4
LOC5575209	347629325	0.745674	0.959274	4.68759	0.380021	0.0774854	0.25699	N568K	TA	2	MIT	AaeL_AAEL014664, AAEL014663, AAEL014664	acyl-CoA synthetase family member 2, mitochondrial
LOC5572180	357797466	0.166274	0	4.68661	0.270552	0	0.162628	L256M	AT	2	Redox	AaeL_AAEL009591, AAEL009591, CYP9M8	cytochrome P450 (CYP9M8)
LOC5574084	31487878	0.0060241	0.18156	4.68458	0.0123452	0.300554	0.161813	I128N	TA	2	RRTT	AaeL_AAEL002279, AAEL002279	transcription factor grauzone
LOC5573858	304978765	0.600543	0.866553	4.67898	0.480532	0.227105	0.402682	E51Q	GC	2	PROT	AaeL_AAEL010782, AAEL010782, CPA, CPA-I	zinc carboxypeptidase A 1|carboxypeptidase A
LOC5575900	232478200	0.309466	0.0728882	4.67814	0.422406	0.144673	0.316905	H844L	TA	2	DIV	AaeL_AAEL012146, AAEL012146	ubiquitin carboxyl-terminal hydrolase 35|ubiquitin carboxyl-terminal hydrolase 38
LOC5573858	304977963	0.497413	0.785575	4.66793	0.499953	0.349454	0.476371	A318G	CG	2	PROT	AaeL_AAEL010782, AAEL010782, CPA, CPA-I	zinc carboxypeptidase A 1|carboxypeptidase A
LOC5573858	304977955	0.510263	0.796053	4.66184	0.499535	0.338449	0.470902	T321A	CT	2	PROT	AaeL_AAEL010782, AAEL010782, CPA, CPA-I	zinc carboxypeptidase A 1|carboxypeptidase A
LOC5569441	372027173	0.183913	0.465014	4.66154	0.301514	0.4975	0.430921	V236A	TC	2	DIV	AaeL_AAEL001238, AAEL001238	HEAT repeat-containing protein 1 homolog
LOC5564235	147424142	0.305901	0.0710784	4.66142	0.426764	0.132653	0.318407	F9L	TG	2	DIV	AaeL_AAEL004170, AAEL004170	zinc finger protein 43|zinc finger protein 90
LOC5567635	49107804	0.782586	0.494297	4.6563	0.363045	0.49999	0.46626	A992S	AC	2	DIV	AaeL_AAEL006211, AAEL006211	tonsoku-like protein
LOC5579486	93208915	0.0608428	0.288542	4.65135	0.111409	0.426664	0.26122	L145I	AT	2	PROT	AaeL_AAEL015294, AAEL015294	chymotrypsin-2|salivary chymotrypsin-like enzyme
LOC5567999	438611589	0.467545	0.759033	4.63588	0.498815	0.372175	0.480881	M503V	GA	2	DIV	AaeL_AAEL006449, AAEL006449	serine/threonine-protein kinase 40
LOC5574085	31536681	0.646154	0.346951	4.63418	0.463869	0.454192	0.499973	V831I	CT	2	TRP	AaeL_AAEL002260, AAEL002260	trafficking protein particle complex subunit 11
LOC5576054	332006580	0.319559	0.618182	4.634	0.439817	0.473799	0.499137	T317S	TA	2	DIV	AaeL_AAEL013952, AAEL013952	prohibitin-2
LOC5575654	209120478	0.760098	0.965784	4.62958	0.366148	0.0675761	0.25197	T167A	CT	2	MET	AaeL_AAEL011973, AAEL011973	fumarylacetoacetase
LOC5575763	14408505	0.0953825	0.341896	4.60691	0.197531	0.452465	0.364515	D67N	CT	2	DIV	AaeL_AAEL002699, AAEL002699, SRPN7	neuroserpin
LOC5569854	41549972	0.163291	0	4.60578	0.275059	0	0.162822	H217Q	AT	2	UNK	AaeL_AAEL007956, AAEL007956	uncharacterized protein LOC5569854
LOC5569854	41549972	0.163291	0	4.60578	0.275059	0	0.162822	H217Q	AT	2	UNK	AaeL_AAEL007956, AAEL007956	uncharacterized protein LOC5569854
LOC5573202	425324252	0.445013	0.169888	4.60439	0.493169	0.285507	0.42	L125F	GA	2	DIV	AaeL_AAEL001978, AAEL001978	uroporphyrinogen-III synthase
LOC5580160	353278643	0.634287	0.888285	4.59878	0.464945	0.196259	0.360486	T26S	CG	2	UNK	AaeL_AAEL011397, AAEL011397	uncharacterized protein LOC5580160
LOC5570915	262291463	0.376208	0.673693	4.59729	0.467682	0.432623	0.499247	E185D	GC	2	RNA_PROC	AaeL_AAEL001506, AAEL001506	U3 small nucleolar ribonucleoprotein protein MPP10
LOC5570738	99386962	0.195558	0.476896	4.59479	0.317616	0.499949	0.45195	R712Q	CT	2	MIT	AaeL_AAEL008509, AAEL008509	alanine--tRNA ligase, mitochondrial
LOC5576676	94096080	0.919221	0.681136	4.5932	0.143856	0.44917	0.329338	D911E	CA	2	TRP	AaeL_AAEL012698, AAEL012698	ATP-binding cassette sub-family A member 3
LOC5579471	352692618	0.162698	0	4.58974	0.283498	0	0.146713	R1801H	CT	2	DIV	AaeL_AAEL013698, AAEL013697, AAEL013698, AAEL013699	LOW QUALITY PROTEIN: restin homolog
LOC5566332	63510058	0.798653	0.517154	4.56542	0.316757	0.499736	0.438706	S4982L	AG	2	CYT/STR	AaeL_AAEL005324, AAEL005324, AAEL005338	titin
LOC5566254	288130017	0	0.161681	4.56223	0	0.269313	0.16771	A110V	GA	2	UNK		uncharacterized protein LOC5566254
LOC5575748	422951257	0.728243	0.43594	4.55573	0.396932	0.491604	0.49038	D1144E	AT	2	UNK	AaeL_AAEL012057, AAEL012057	uncharacterized protein LOC5575748
LOC5574807	78863019	0.317297	0.0807998	4.55104	0.432778	0.137487	0.32699	P316A	CG	2	CYT/STR	AaeL_AAEL002481, AAEL002481	probable chitinase 10
LOC5573660	98256230	0.0283019	0.225127	4.54268	0.0605469	0.362034	0.253907	S972A	TG	2	RRTT	AaeL_AAEL010646, AAEL010646, AAEL010648	protein dead ringer
LOC5575748	422950221	0.420235	0.152899	4.53675	0.482693	0.262091	0.383831	Q799R	AG	2	UNK	AaeL_AAEL012057, AAEL012057	uncharacterized protein LOC5575748
LOC5564833	407510238	0.183092	0.00892857	4.5358	0.300554	0.0181803	0.177844	A178T	GA	2	SigT	AaeL_AAEL000600, AAEL000600	protein Wnt-10a
LOC5572437	374856149	0.0768588	0.310118	4.52644	0.147835	0.429102	0.311454	N1724H	AC	2	DIV	AaeL_AAEL001803, AAEL001803	chondroitin sulfate proteoglycan 4
LOC5574362	235931546	0.669136	0.909759	4.52259	0.450446	0.173817	0.364016	D191N	TC	2	DIV	AaeL_AAEL011086, AAEL011086, AAEL801154	zinc finger protein Elbow
LOC5564934	453112112	0.203015	0.0180723	4.51732	0.327254	0.0357025	0.182159	N40K	AT	2	DIV	AaeL_AAEL004504, AAEL004504	probable serine hydrolase
LOC5568174	462898514	0.0320513	0.231396	4.51248	0.057421	0.360992	0.197531	K379N	AC	2	UNK	AaeL_AAEL006630, AAEL006630	uncharacterized protein LOC5568174
LOC5566236	69160480	0	0.159597	4.50593	0	0.265465	0.152542	G377D	GA	2	MIT	AaeL_AAEL005269, AAEL005269	cytochrome b-c1 complex subunit 2, mitochondrial
LOC5575613	190567112	0.985075	0.80453	4.49924	0.0350765	0.320891	0.207612	T92A	GA	2	Detox	AaeL_AAEL011944, AAEL011944	Carboxy/choline esterase Alpha Esterase (CCEAE3O)
LOC5570540	47839485	0.19464	0.0145631	4.49857	0.318458	0.0277723	0.167302	H135Y	GA	2	DIV	AaeL_AAEL001416, AAEL001416	inner nuclear membrane protein Man1
LOC5569844	351609764	0.657918	0.901682	4.49654	0.449996	0.178137	0.363671	Q84R	GA	2	Redox	AaeL_AAEL007954, AAEL007954, GSTE1	glutathione transferase epsilon 1 (GSTE1)
LOC5568311	84002190	0.279996	0.570599	4.49039	0.408778	0.488701	0.484488	I162V	AG	2	DIV	AaeL_AAEL006732, AAEL006732	DC-STAMP domain-containing protein 2
LOC5566332	63562693	0.978723	0.791313	4.48623	0.0523638	0.331897	0.164854	T1960S	CG	2	CYT/STR	AaeL_AAEL005324, AAEL005324, AAEL005338	titin
LOC5576054	332006588	0.340302	0.633927	4.48559	0.453686	0.462187	0.499977	A314V	AG	2	DIV	AaeL_AAEL013952, AAEL013952	prohibitin-2
LOC5568192	464094271	1	0.841175	4.48512	0	0.281528	0.1472	A17E	AC	2	DIV	AaeL_AAEL006614, AAEL006614	zinc finger protein 37 homolog
LOC5563772	354845360	0.772881	0.969136	4.45951	0.354506	0.0686415	0.239063	D645G	CT	2	DIV	AaeL_AAEL003941, AAEL003931, AAEL003941	nucleoporin nup124
LOC5579646	195950218	0.511057	0.22906	4.44025	0.499969	0.3559	0.460758	G535E	GA	2	DIV	AaeL_AAEL003978, AAEL003978	zinc finger protein 329
LOC5567124	66437403	0.571925	0.283085	4.43744	0.488765	0.403337	0.488319	A120T	GA	2	UNK	AaeL_AAEL005872, AAEL005872	uncharacterized protein LOC5567124
LOC5574284	63396387	0.136509	0.394289	4.43695	0.236745	0.472688	0.371151	K174Q	TG	2	DIV	AaeL_AAEL011053, AAEL011053	GDNF-inducible zinc finger protein 1
LOC5573859	304967658	0.265641	0.552655	4.43603	0.39551	0.494575	0.473822	F69Y	TA	2	PROT	AaeL_AAEL010780, AAEL010780	zinc carboxypeptidase A 1
LOC5570290	179615143	0.156908	0	4.43344	0.26692	0	0.164703	R1284Q	GA	2	DIV	AaeL_AAEL011241, AAEL008229, AAEL011241	protein disabled
LOC110675487	199326414	0.372917	0.121324	4.42991	0.460224	0.21366	0.368334	E107*	CA	2	RRTT		histone deacetylase Rpd3-like
LOC5571141	240838981	0.622959	0.331662	4.4287	0.467537	0.432528	0.498894	I120V	TC	2	Redox	AaeL_AAEL008846, AAEL008846, CYP9J32	cytochrome P450 (CYP9J32)
LOC5574892	4586694	0.460815	0.187816	4.42853	0.49639	0.321047	0.422905	D144N	GA	2	CSR	AaeL_AAEL011482, AAEL011482	general odorant-binding protein 67
LOC5568315	83930722	0.59624	0.306119	4.42646	0.485004	0.417377	0.486821	Q1140K	CA	2	UNK	AaeL_AAEL006754, AAEL006754	uncharacterized protein LOC5568315
LOC5576455	82663801	0.330669	0.621839	4.42608	0.440213	0.466241	0.499854	N2H	TG	2	DIV	AaeL_AAEL012538, AAEL012538	leucine-rich repeat-containing G-protein coupled receptor 4
LOC5577471	313121765	0.0187166	0.199928	4.39583	0.0497895	0.336735	0.181402	S1897N	GA	2	TRP		ATP-binding cassette sub-family C member Sur
LOC5566236	69160377	0	0.154742	4.37517	0	0.259913	0.128308	A343T	GA	2	MIT	AaeL_AAEL005269, AAEL005269	cytochrome b-c1 complex subunit 2, mitochondrial
LOC5570794	157226279	0.0788462	0.307302	4.37018	0.14456	0.409687	0.282635	F129Y	TA	2	DIV	AaeL_AAEL008569, AAEL008569	TPPP family protein CG45057
LOC5573247	404065332	0.410965	0.151148	4.3596	0.486508	0.254798	0.406568	V614I	CT	2	RRTT	AaeL_AAEL010336, AAEL010336	ribonuclease Z, mitochondrial
LOC5566332	63506324	0.24795	0.0439442	4.35745	0.378276	0.0908817	0.238218	E6227K	CT	2	CYT/STR	AaeL_AAEL005324, AAEL005324, AAEL005338	titin
LOC5568606	399243432	0.193898	0.0165975	4.35657	0.294052	0.0372826	0.175513	G829R	CT	2	UNK	AaeL_AAEL006973, AAEL006973	uncharacterized protein LOC5568606
LOC110676649	28807335	0.0240964	0.209725	4.35594	0.0610081	0.325124	0.187231	A20G	GC	2	UNK		uncharacterized protein LOC110676649
LOC5572764	111143016	0.359438	0.113969	4.35298	0.460138	0.202908	0.353423	H327Q	CG	2	DIV	AaeL_AAEL013688, AAEL013688	WD repeat-containing protein 89
LOC5580035	402870283	0.4004	0.143445	4.35296	0.476074	0.256762	0.37622	D957E	AC	2	DIV	AaeL_AAEL010234, AAEL010234	tyrosine-protein phosphatase non-receptor type 21
LOC5573257	404460365	1	0.84666	4.33749	0	0.263278	0.15555	T51M	TC	2	TRP	AaeL_AAEL010334, AAEL010334	alpha-tocopherol transfer protein
LOC23687976	419270865	0	0.152861	4.32463	0	0.261727	0.146753	G164E	GA	2	Redox	AaeL_AAEL017556, AAEL017556	cytochrome P450 6A1
LOC5571268	22749822	0.00892857	0.175181	4.32091	0.0180165	0.280987	0.158285	P342L	CT	2	UNK	AaeL_AAEL001584, AAEL001584	uncharacterized protein LOC5571268
LOC5577937	450791867	0.395652	0.141017	4.31582	0.478203	0.235537	0.378703	L282P	AG	2	DIV	AaeL_AAEL013417, AAEL013417	angiopoietin-related protein 1
LOC5568290	177726913	0.429537	0.713889	4.3154	0.490807	0.421658	0.494716	I135V	GA	2	DIV	AaeL_AAEL011044, AAEL011044	cilia- and flagella-associated protein 251
LOC5569441	372027352	0.334792	0.621336	4.30218	0.454568	0.465077	0.499747	A296T	AG	2	DIV	AaeL_AAEL001238, AAEL001238	HEAT repeat-containing protein 1 homolog
LOC5569762	474118915	0.0110619	0.179275	4.2968	0.0226215	0.282996	0.156503	E6566K	CT	2	UNK		uncharacterized protein LOC5569762|uncharacterized protein PFB0145c
LOC5567333	471844730	0.51383	0.236607	4.28803	0.499797	0.366528	0.475947	A1060V	GA	2	UNK	AaeL_AAEL006004, AAEL006004	uncharacterized protein LOC5567333
LOC5568606	399243329	0.166573	0.00588235	4.28674	0.273842	0.0105538	0.15814	V863E	AT	2	UNK	AaeL_AAEL006973, AAEL006973	uncharacterized protein LOC5568606
LOC5574507	304651649	0.254661	0.0491904	4.2862	0.373195	0.0942559	0.26301	L237V	AC	2	DIV	AaeL_AAEL002374, AAEL002374	alpha-taxilin
LOC5575900	232478116	0.610779	0.325488	4.27732	0.476228	0.438145	0.496869	F872Y	AT	2	DIV	AaeL_AAEL012146, AAEL012146	ubiquitin carboxyl-terminal hydrolase 35|ubiquitin carboxyl-terminal hydrolase 38
LOC5579471	352692660	0.84898	1	4.27524	0.261853	0	0.139625	L1787*	TA	2	DIV	AaeL_AAEL013698, AAEL013697, AAEL013698, AAEL013699	LOW QUALITY PROTEIN: restin homolog
LOC5575899	232636056	0.770555	0.727273	4.27103	0.505439	0.661116	0.616196	V299I	TAC	2	RRTT	AaeL_AAEL012147, AAEL012147	small subunit processome component 20 homolog
LOC110673980	304940536	0.195989	0.464226	4.25985	0.311287	0.497188	0.443963	A372G	GC	2	MET	AaeL_AAEL010764, AAEL010764	cytosolic 10-formyltetrahydrofolate dehydrogenase-like
LOC5576054	332006577	0.325962	0.610575	4.25942	0.442901	0.481915	0.498292	T318A	TC	2	DIV	AaeL_AAEL013952, AAEL013952	prohibitin-2
LOC5576948	251933915	0.33631	0.0890351	4.25413	0.439279	0.163044	0.351243	L10673P	AGT	2	UNK	AaeL_AAEL012905, AAEL012905, AAEL012908, AAEL012909, AAEL012910	LOW QUALITY PROTEIN: uncharacterized protein LOC5576948
LOC5577937	450791861	0.393037	0.141017	4.25	0.47674	0.235537	0.384256	S284N	CT	2	DIV	AaeL_AAEL013417, AAEL013417	angiopoietin-related protein 1
LOC5568681	224446849	0.0360785	0.229138	4.24462	0.0696763	0.335644	0.184396	E84G	TC	2	Redox	AaeL_AAEL007033, AAEL007033, P5CR-3	pyrroline-5-carboxylate reductase
LOC5570271	6438082	0.257121	0.0515768	4.2405	0.381202	0.087249	0.265735	G25S	CT	2	PROT	AaeL_AAEL008214, AAEL008214	brachyurin
LOC5566332	63509391	0.244171	0.044441	4.2334	0.375824	0.0826481	0.251277	E5204D	CG	2	CYT/STR	AaeL_AAEL005324, AAEL005324, AAEL005338	titin
LOC23687489	306693291	0.14918	0	4.22593	0.234158	0	0.151893	I124V	TC	2	UNK	AaeL_AAEL017069, AAEL017069	uncharacterized protein LOC23687489
LOC23687489	306693291	0.14918	0	4.22593	0.234158	0	0.151893	I124V	TC	2	UNK	AaeL_AAEL017069, AAEL017069	uncharacterized protein LOC23687489
LOC5571220	12705026	0.722349	0.93588	4.21909	0.411542	0.127334	0.279445	D83N	AG	2	RRTT	AaeL_AAEL008906, AAEL008906	protein ecdysoneless
LOC5565916	458716968	0.279732	0.0654943	4.21405	0.392066	0.118629	0.265621	P1239H	CA	2	UNK	AaeL_AAEL000682, AAEL000682	uncharacterized protein LOC5565916
LOC5567333	471845550	0.258984	0.0532514	4.21288	0.383106	0.103584	0.250969	A787T	CT	2	UNK	AaeL_AAEL006004, AAEL006004	uncharacterized protein LOC5567333
LOC5564295	127112597	0.0192568	0.193966	4.20369	0.0382021	0.308926	0.165289	P774H	CA	2	DIV	AaeL_AAEL014392, AAEL014392	keratin-associated protein 16-1|leucine-rich repeat extensin-like protein 5
LOC5575133	124277176	0.190467	0.0176991	4.19939	0.302045	0.0350765	0.167137	P204S	CT	2	UNK	AaeL_AAEL000314, AAEL000314	uncharacterized protein LOC5575133
LOC5571528	419242425	0.440925	0.179343	4.19621	0.491493	0.287335	0.42344	V425M	CT	2	Redox	AaeL_AAEL009126, AAEL009126, CYP6N6	cytochrome P450 (CYP6N6)
LOC5563772	354831585	0.178798	0.0125	4.19498	0.292521	0.015872	0.186632	A1073T	CT	2	DIV	AaeL_AAEL003941, AAEL003931, AAEL003941	nucleoporin nup124
LOC5571390	101744791	0.39652	0.14532	4.19216	0.473698	0.27258	0.389273	K346R	TC	2	PROT	AaeL_AAEL009038, AAEL009038	putative serine protease F56F10.1
LOC5579471	352692651	0.852204	1	4.18887	0.256923	0	0.140511	G1790E	TC	2	DIV	AaeL_AAEL013698, AAEL013697, AAEL013698, AAEL013699	LOW QUALITY PROTEIN: restin homolog
LOC5569161	134847286	0.147786	0	4.18862	0.244898	0	0.124444	V833A	TC	2	RRTT	AaeL_AAEL007417, AAEL007417	activating transcription factor 7-interacting protein 1
LOC5565771	281399073	0.0591981	0.267802	4.17733	0.115741	0.388503	0.241033	A210T	GA	2	DIV	AaeL_AAEL004983, AAEL004983	inhibitor of growth protein 4
LOC5579471	352694154	0.209829	0.0274835	4.17476	0.330495	0.0566528	0.2108	S1289N	CT	2	DIV	AaeL_AAEL013698, AAEL013697, AAEL013698, AAEL013699	LOW QUALITY PROTEIN: restin homolog
LOC5578221	15536873	0.752328	0.478196	4.16921	0.376253	0.4972	0.467657	D612N	TC	2	DIV		zinc finger protein 62 homolog|zinc finger protein 729|zinc finger protein 91
LOC5577109	349143322	0.146628	0	4.15765	0.214746	0	0.114006	A28V	CT	2	UNK	AaeL_AAEL013006, AAEL013006	uncharacterized protein LOC5577109
LOC5571835	87799593	0.366899	0.109133	4.15441	0.461778	0.181947	0.363797	T91M	GAT	2	UNK	AaeL_AAEL001688, AAEL001688	uncharacterized protein LOC5571835
LOC5577277	338389932	0	0.146465	4.15329	0	0.250484	0.134313	Q59*	GA	2	DIV	AaeL_AAEL013127, AAEL013127	protein G12
LOC5569161	134846830	0.160938	0.00568182	4.14815	0.275407	0.0114939	0.16157	D681V	AT	2	RRTT	AaeL_AAEL007417, AAEL007417	activating transcription factor 7-interacting protein 1
LOC5571554	342469246	0.146241	0	4.14731	0.249734	0	0.132247	N16S	AG	2	DIV	AaeL_AAEL009147, AAEL009147	vacuolar fusion protein MON1 homolog A
LOC5566332	63508588	0.343872	0.10881	4.14711	0.451052	0.181731	0.308926	T5472K	GT	2	CYT/STR	AaeL_AAEL005324, AAEL005324, AAEL005338	titin
LOC5570349	204969055	0	0.146199	4.14618	0	0.249649	0.130417	E313K	CT	2	UNK	AaeL_AAEL001359, AAEL001359	uncharacterized protein LOC5570349
LOC5564930	451315752	0.649587	0.346463	4.14256	0.452765	0.456673	0.502162	R178L	CAT	2	PROT	AaeL_AAEL004505, AAEL004505	chymotrypsin
LOC5564561	388003742	1	0.853992	4.1411	0	0.252401	0.134876	M379I	TC	2	MET	AaeL_AAEL004323, AAEL004323	Carboxy/choline esterase (CCEJHE2O)
LOC5569218	57655647	0.233295	0.504024	4.13986	0.332643	0.499975	0.430385	N485S	TC	2	UNK	AaeL_AAEL007454, AAEL007454, AAEL007475	uncharacterized protein LOC5569218
LOC5572630	184362833	0.804899	0.542409	4.12265	0.31565	0.49658	0.438573	E26K	TC	2	PROT	AaeL_AAEL001844, AAEL001844, CPB-IV	carboxypeptidase B
LOC5569882	431927732	0.0438131	0.238547	4.1152	0.0900242	0.355713	0.236602	I579T	AG	2	CYT/STR	AaeL_AAEL007968, AAEL007968	laminin subunit gamma-1
LOC5569383	343941297	0.03	0.212498	4.11324	0.0562907	0.346737	0.228884	P288S	CT	2	DIV		LOW QUALITY PROTEIN: protein arginine N-methyltransferase 5
LOC5576948	251999819	0.0910903	0.344639	4.10389	0.176086	0.458882	0.357319	M515T	AGT	2	UNK	AaeL_AAEL012905, AAEL012905, AAEL012908, AAEL012909, AAEL012910	LOW QUALITY PROTEIN: uncharacterized protein LOC5576948
LOC5572794	389644284	0.17492	0.430882	4.08675	0.2922	0.489981	0.427873	A466S	GT	2	DIV	AaeL_AAEL001902, AAEL001902	acidic amino acid decarboxylase GADL1|cysteine sulfinic acid decarboxylase|glutamate decarboxylase 1
LOC5573117	423973803	0.126768	0.366895	4.08541	0.206801	0.465642	0.363045	E51D	AC	2	MIT	AaeL_AAEL001960, AAEL001960	cytochrome P450 (CYP12F5)
LOC5576943	62811982	1	0.856242	4.08102	0	0.249393	0.136751	G2847S	AG	2	DIV	AaeL_AAEL012888, AAEL012888, AAEL012889, AAEL012890	sorbin and SH3 domain-containing protein 1|uncharacterized protein LOC5576943
LOC5572883	35708324	0.452537	0.192444	4.07912	0.497892	0.31707	0.440901	S318P	AG	2	SD	AaeL_AAEL010108, AAEL010108	protein fem-1 homolog B
LOC5576678	94115545	0.443212	0.18547	4.06309	0.496786	0.30864	0.439156	S1621G	TC	2	TRP	AaeL_AAEL012701, AAEL012701	ATP-binding cassette sub-family A member 1
LOC5569854	41549947	0.142989	0	4.06053	0.246857	0	0.119987	L226I	AT	2	UNK	AaeL_AAEL007956, AAEL007956	uncharacterized protein LOC5569854
LOC5569854	41549947	0.142989	0	4.06053	0.246857	0	0.119987	L226I	AT	2	UNK	AaeL_AAEL007956, AAEL007956	uncharacterized protein LOC5569854
LOC5576988	212559254	0.0946111	0.319455	4.05986	0.164329	0.441934	0.341586	T233I	GA	2	DIV	AaeL_AAEL003067, AAEL003067	merozoite surface antigen 2, allelic form 2|uncharacterized protein LOC5576988
LOC5566990	293832065	0.03125	0.212793	4.05638	0.0483574	0.330159	0.226617	L72F	GA	2	TRP		LOW QUALITY PROTEIN: myosin heavy chain, muscle
LOC5570268	6397249	0.0304716	0.211263	4.05599	0.0590948	0.329076	0.205936	T15I	CT	2	PROT	AaeL_AAEL008202, AAEL008197, AAEL008202	transmembrane protease serine 9
LOC5569682	272886862	0.390556	0.144977	4.05586	0.477716	0.247705	0.405889	G21S	CT	2	DIV	AaeL_AAEL007826, AAEL007826	cGMP-dependent protein kinase, isozyme 2 forms cD4/T1/T3A/T3B|cGMP-dependent protein kinase, isozyme 2 forms cD5/T2
LOC5571858	404676708	0.0357143	0.221302	4.05527	0.054751	0.353668	0.262557	I411V	AG	2	MET	AaeL_AAEL009344, AAEL009344, AAEL801139	adenylate cyclase type 3
LOC5572767	111226326	0.655492	0.378396	4.05458	0.448308	0.46875	0.49978	T638A	CT	2	UNK	AaeL_AAEL013686, AAEL010024, AAEL013686	uncharacterized protein LOC5572767|putative microtubule-associated protein futsch
LOC5569383	343941342	0.165283	0.00892857	4.05405	0.276831	0.0184316	0.16562	L303F	CT	2	DIV		LOW QUALITY PROTEIN: protein arginine N-methyltransferase 5
LOC5574089	31412846	0	0.14274	4.05387	0	0.243517	0.12745	G372A	CG	2	DIV	AaeL_AAEL002272, AAEL002272	YTH domain-containing protein 1
LOC5564508	293277485	0.857261	1	4.05386	0.230427	0	0.108522	F153Y	TA	2	UNK	AaeL_AAEL004271, AAEL004271	uncharacterized protein LOC5564508
LOC5564508	293277485	0.857261	1	4.05386	0.230427	0	0.108522	F153Y	TA	2	UNK	AaeL_AAEL004271, AAEL004271	uncharacterized protein LOC5564508
LOC5575665	465788849	0.601671	0.325442	4.04721	0.473521	0.434453	0.498104	I135V	AG	2	DIV	AaeL_AAEL002694, AAEL002694, AAEL801162	transmembrane protein 87A
LOC5566670	337142817	0.370602	0.130559	4.04716	0.46634	0.228832	0.373343	R19H	CT	2	CYT/STR	AaeL_AAEL005548, AAEL005548	tetraspanin-6
LOC5565079	114866164	0.929619	0.718939	4.04261	0.131957	0.412829	0.281599	E202D	TA	2	UNK	AaeL_AAEL014713, AAEL014713	uncharacterized protein LOC5565079
LOC5569161	134847282	0.142229	0	4.04026	0.231111	0	0.10718	A832P	GC	2	RRTT	AaeL_AAEL007417, AAEL007417	activating transcription factor 7-interacting protein 1
LOC5567023	437039066	0.347619	0.624188	4.03992	0.455	0.470187	0.499837	Y32F	TA	2	TRP	AaeL_AAEL005759, AAEL005759	heat shock protein 67B2
LOC5579471	352694823	0.654762	0.886905	4.02685	0.457217	0.204142	0.366745	H1066R	CT	2	DIV	AaeL_AAEL013698, AAEL013697, AAEL013698, AAEL013699	LOW QUALITY PROTEIN: restin homolog
LOC5575899	232636023	0.630933	0.354842	4.02568	0.464767	0.460154	0.499582	G310S	TC	2	RRTT	AaeL_AAEL012147, AAEL012147	small subunit processome component 20 homolog
LOC5574383	231967127	0.556716	0.284127	4.0254	0.496483	0.409294	0.492128	D290G	AG	2	MET	AaeL_AAEL011102, AAEL011102	lysosomal-associated transmembrane protein 4B
LOC5565350	290527159	0.165043	0.415528	4.02083	0.280268	0.493827	0.425705	M130I	CT	2	TRP	AaeL_AAEL004741, AAEL004741	neurogenic protein big brain
LOC5579471	352692957	0.141206	0	4.01302	0.240376	0	0.127348	Q1688P	TG	2	DIV	AaeL_AAEL013698, AAEL013697, AAEL013698, AAEL013699	LOW QUALITY PROTEIN: restin homolog
LOC5565970	165332843	0.656487	0.38107	4.01278	0.462661	0.475848	0.499875	L880F	AT	2	CSR	AaeL_AAEL015018, AAEL015018	protein artichoke
LOC110675816	98637123	0.00740741	0.160024	4.01048	0.0140838	0.281837	0.143832	S691T	TA	2	UNK		uncharacterized protein LOC110675816
LOC5569613	152871767	0	0.140996	4.00742	0	0.236013	0.141487	V97A	AG	2	UNK		uncharacterized protein LOC5569613
LOC5571658	299716072	0.250085	0.517951	4.00685	0.373403	0.499371	0.469168	Q974R	AG	2	RRTT	AaeL_AAEL001666, AAEL001666	meiosis regulator and mRNA stability factor 1
LOC5568290	177727193	0.513133	0.776667	4.00616	0.499117	0.360368	0.458165	R228Q	AG	2	DIV	AaeL_AAEL011044, AAEL011044	cilia- and flagella-associated protein 251
LOC5571279	21735303	0.311494	0.585368	4.00597	0.419662	0.492188	0.492819	R85G	AG	2	DIV	AaeL_AAEL001565, AAEL001565	peptidyl-alpha-hydroxyglycine alpha-amidating lyase 1
LOC5566976	437286041	0.159435	0.00729927	4.00168	0.28395	0.0153248	0.169642	G96R	CT	2	RRTT	AaeL_AAEL005744, AAEL005744	probable ATP-dependent RNA helicase pitchoune
LOC5569703	460534824	0.237164	0.502731	3.99815	0.375	0.499972	0.465616	L1747S	AG	2	DIV	AaeL_AAEL007856, AAEL007856	protein eyes shut
LOC5570251	5870445	0.676091	0.900658	3.99463	0.441676	0.178822	0.348151	P65L	AG	2	UNK	AaeL_AAEL008205, AAEL008205	uncharacterized protein LOC5570251
LOC110676814	338020206	0.00442478	0.151941	3.99089	0.0109286	0.252687	0.142012	L117V	AC	2	DIV		protein G12-like
LOC5573256	404419649	0.242723	0.508498	3.98222	0.369482	0.499895	0.462124	H124L	TA	2	UNK	AaeL_AAEL010338, AAEL010338	uncharacterized protein LOC5573256
LOC5571766	17574917	0.798563	0.972973	3.97581	0.311793	0.030527	0.21875	S28I	AC	2	RRTT	AaeL_AAEL009285, AAEL009285	ATP-dependent RNA helicase DDX54
LOC5571659	299490664	0.139766	0	3.9747	0.230717	0	0.132389	L210F	CT	2	DIV	AaeL_AAEL001652, AAEL001652	musculin
LOC5568186	463397564	0.139706	0	3.97309	0.250865	0	0.161513	D119N	CT	2	DIV	AaeL_AAEL006623, AAEL006623	flocculation protein FLO11|uncharacterized protein LOC5568186
LOC5568140	132828709	0.219359	0.0363636	3.97199	0.343513	0.0703905	0.241655	R362L	GT	2	Redox	AaeL_AAEL006583, AAEL006583	L-ascorbate oxidase
LOC5571330	178019830	0	0.139657	3.97181	0	0.241866	0.145245	D59N	CT	2	CYT/STR	AaeL_AAEL008984, AAEL008984	cuticle protein 19
LOC5572655	275782005	0.182946	0.0181818	3.97007	0.288434	0.0357025	0.17016	V290I	GA	2	DIV	AaeL_AAEL001837, AAEL001837	pancreatic lipase-related protein 2
LOC5573931	429330805	0.216195	0.476875	3.96953	0.336981	0.497041	0.448359	T1149A	TC	2	LIPID	AaeL_AAEL002237, AAEL002237	fatty acid synthase
LOC5572921	264730892	0.413828	0.686321	3.96877	0.486696	0.430646	0.497118	C733S	CG	2	TRP	AaeL_AAEL010135, AAEL010135	conserved oligomeric Golgi complex subunit 4
LOC5579471	352694241	0.725049	0.931597	3.9686	0.398215	0.127664	0.281499	K1260R	CT	2	DIV	AaeL_AAEL013698, AAEL013697, AAEL013698, AAEL013699	LOW QUALITY PROTEIN: restin homolog
LOC5568275	96170541	0.164956	0.0104167	3.95174	0.2688	0.0243865	0.152778	E124V	AT	2	DIV	AaeL_AAEL006706, AAEL006706, AAEL011516	O-acyltransferase like protein
LOC5565970	165332922	0.195834	0.451215	3.94554	0.333797	0.495317	0.456326	P854Q	GT	2	CSR	AaeL_AAEL015018, AAEL015018	protein artichoke
LOC5575933	203828977	0.365433	0.129812	3.94543	0.468115	0.213468	0.367612	A6T	CT	2	MET	AaeL_AAEL009664, AAEL009664	aldehyde dehydrogenase, dimeric NADP-preferring|aldehyde dehydrogenase 3-2
LOC5572793	389588998	0.159897	0.40563	3.94257	0.269856	0.48394	0.38655	V814I	GA	2	DIV	AaeL_AAEL001906, AAEL001906	dentin sialophosphoprotein
LOC5579471	352694814	0.656746	0.885734	3.93636	0.457217	0.208237	0.361781	P1069L	AG	2	DIV	AaeL_AAEL013698, AAEL013697, AAEL013698, AAEL013699	LOW QUALITY PROTEIN: restin homolog
LOC5579501	389099442	0.84124	0.596165	3.93502	0.267669	0.477041	0.392373	R1080S	TG	2	UNK	AaeL_AAEL015242, AAEL013175, AAEL015242	uncharacterized protein LOC5579501
LOC5569697	460414145	0.214192	0.473039	3.9348	0.34276	0.499815	0.418433	A61D	GT	2	UNK	AaeL_AAEL007849, AAEL007849	uncharacterized protein LOC5569697
LOC5569613	152871741	0	0.138214	3.93343	0	0.238905	0.149791	P106S	GA	2	UNK		uncharacterized protein LOC5569613
LOC5571533	419194649	0.65393	0.381694	3.93201	0.453686	0.459357	0.498967	L412R	TG	2	Redox	AaeL_AAEL009122, AAEL009122	cytochrome P450 (CYP6N15)
LOC5567995	438676026	0.487524	0.751866	3.92825	0.499682	0.377092	0.472318	V426A	GA	2	RRTT	AaeL_AAEL006437, AAEL006437	dnaJ homolog subfamily C member 21
LOC5566332	63562660	0.983871	0.823253	3.92322	0.0398242	0.294052	0.140983	I1971T	GA	2	CYT/STR	AaeL_AAEL005324, AAEL005324, AAEL005338	titin
LOC5569524	470569363	0.977528	0.809847	3.92176	0.0337453	0.30817	0.195457	A577T	TC	2	DIV	AaeL_AAEL007700, AAEL007700	ETV5-related protein Ets96B
LOC5571155	241425101	0	0.137771	3.92166	0	0.239198	0.129244	S703N	GA	2	DIV	AaeL_AAEL008840, AAEL008840	Bardet-Biedl syndrome 2 protein homolog
LOC5569854	41549945	0.137736	0	3.92073	0.239198	0	0.118571	L226F	TA	2	UNK	AaeL_AAEL007956, AAEL007956	uncharacterized protein LOC5569854
LOC5569854	41549945	0.137736	0	3.92073	0.239198	0	0.118571	L226F	TA	2	UNK	AaeL_AAEL007956, AAEL007956	uncharacterized protein LOC5569854
LOC5573931	429330818	0.18487	0.436153	3.91021	0.298727	0.489255	0.423618	I1144M	TC	2	LIPID	AaeL_AAEL002237, AAEL002237	fatty acid synthase
LOC5570361	37100554	0.795138	0.539254	3.90958	0.32699	0.496874	0.428513	E16D	AT	2	DIV	AaeL_AAEL008268, AAEL008268, AAEL011443, AAEL011457	alpha-tocopherol transfer protein-like|retinaldehyde-binding protein 1
LOC5576455	82662806	0.585367	0.315278	3.90753	0.489433	0.431489	0.496528	V313L	CG	2	DIV	AaeL_AAEL012538, AAEL012538	leucine-rich repeat-containing G-protein coupled receptor 4
LOC5574632	226344509	0.179559	0.0176991	3.90745	0.285004	0.0379005	0.183185	Q1482K	GT	2	DIV		Down syndrome cell adhesion molecule-like protein Dscam2
LOC5579260	47688804	0.654583	0.38339	3.90646	0.439156	0.472066	0.497186	D90N	AG	2	DIV	AaeL_AAEL015651, AAEL015651	mono [ADP-ribose] polymerase PARP16
LOC5579471	352693869	0.747413	0.943456	3.90074	0.377564	0.110727	0.249132	Q1384R	CT	2	DIV	AaeL_AAEL013698, AAEL013697, AAEL013698, AAEL013699	LOW QUALITY PROTEIN: restin homolog
LOC5568315	83928088	0.218009	0.0229999	3.89838	0.332039	0.0448743	0.186446	A262S	GAT	2	UNK	AaeL_AAEL006754, AAEL006754	uncharacterized protein LOC5568315
LOC5570334	205700652	0.19088	0.0232558	3.89828	0.315126	0.0491491	0.220989	P1281H	CA	2	DIV	AaeL_AAEL001361, AAEL001361	AT-rich interactive domain-containing protein 2|SWI/SNF nucleosome remodeling complex component
LOC5570257	6084511	0.583823	0.830447	3.896	0.484611	0.282916	0.406645	R301K	TC	2	TRP	AaeL_AAEL008211, AAEL008211	solute carrier family 25 member 35
LOC5569441	372026926	0.262318	0.527116	3.89353	0.37797	0.498603	0.47255	P154S	CT	2	DIV	AaeL_AAEL001238, AAEL001238	HEAT repeat-containing protein 1 homolog
LOC5572636	184388730	0.964993	0.774201	3.89343	0.181106	0.372984	0.268159	E125Q	CAG	2	PROT	AaeL_AAEL001842, AAEL001842	carboxypeptidase B
LOC5568295	84902824	0.0440174	0.230351	3.89177	0.0840861	0.364646	0.246046	M178I	GA	2	MET	AaeL_AAEL006719, AAEL006719, AMY1, AMY1_AEDAE, AmyI, amylase	alpha-amylase I|1,4-alpha-D-glucan glucanohydrolase|AMY I
LOC5573777	75412753	0.136518	0	3.88838	0.235537	0	0.128224	D2E	CA	2	UNK	AaeL_AAEL000267, AAEL000267	uncharacterized protein LOC5573777
LOC5579471	352692927	0.136508	0	3.88813	0.234044	0	0.120306	R1698K	CT	2	DIV	AaeL_AAEL013698, AAEL013697, AAEL013698, AAEL013699	LOW QUALITY PROTEIN: restin homolog
LOC5573274	182632620	0.202192	0.0293249	3.8758	0.324132	0.0564739	0.207711	I76M	TG	2	MET	AaeL_AAEL010380, AAEL010380, AAEL017185	Aldehyde oxidase (ALDOX 10380)
LOC5579471	352695291	0.285246	0.0771739	3.87402	0.424102	0.147517	0.288572	L910S	AG	2	DIV	AaeL_AAEL013698, AAEL013697, AAEL013698, AAEL013699	LOW QUALITY PROTEIN: restin homolog
LOC5575675	301716172	0.0246479	0.192297	3.8607	0.0396438	0.311396	0.169244	A245T	CT	2	DIV	AaeL_AAEL011988, AAEL011988	tRNA selenocysteine 1-associated protein 1
LOC5567990	439407668	0.00632911	0.151552	3.85402	0.0106949	0.232202	0.127604	T258A	TC	2	DIV	AaeL_AAEL006440, AAEL006440	3-phosphoinositide-dependent protein kinase 1
LOC5574375	231741439	0.543124	0.278261	3.85172	0.495868	0.40337	0.490625	S197G	TC	2	DIV		LOW QUALITY PROTEIN: junctophilin-3
LOC23687976	419270849	0	0.135062	3.84976	0	0.232988	0.125555	N159Y	AT	2	Redox	AaeL_AAEL017556, AAEL017556	cytochrome P450 6A1
LOC5568838	148906136	0.71403	0.92173	3.84899	0.410227	0.135128	0.272506	A15D	TG	2	RRTT	AaeL_AAEL001169, AAEL001169, BOP1_AEDAE	ribosome biogenesis protein BOP1 homolog
LOC5571821	86671401	0	0.134958	3.847	0	0.250026	0.132653	R83I	CA	2	TRP	AaeL_AAEL001691, AAEL001691	proton-coupled folate transporter
LOC5569161	134847401	0.169167	0.0140845	3.84142	0.262509	0.0344721	0.17263	D871E	TA	2	RRTT	AaeL_AAEL007417, AAEL007417	activating transcription factor 7-interacting protein 1
LOC5570915	262294305	0.0615023	0.258563	3.84055	0.113407	0.383194	0.270181	K20R	TC	2	RNA_PROC	AaeL_AAEL001506, AAEL001506	U3 small nucleolar ribonucleoprotein protein MPP10
LOC5565770	281366494	0.0816894	0.290581	3.83083	0.147456	0.414184	0.288474	S862G	TC	2	RRTT	AaeL_AAEL004986, AAEL004986	protein SMG5
LOC5575550	433793621	0.98913	0.83864	3.82768	0.0222194	0.256508	0.174361	S8P	CT	2	PROT	AaeL_AAEL002661, AAEL002661	matrix metalloproteinase-19
LOC5573922	429131823	0.368011	0.135281	3.82583	0.465055	0.228249	0.388292	I11V	AG	2	DIV	AaeL_AAEL002202, AAEL002202	glycine-rich protein
LOC5564021	399812631	0.193119	0.0257732	3.82249	0.312508	0.050727	0.19072	D44E	GC	2	RRTT	AaeL_AAEL014283, AAEL014283, AAEL801129	ribonuclease H2 subunit B
LOC5564490	293188600	0.307239	0.0929006	3.81943	0.426036	0.16874	0.319295	E518D	CA	2	CYT/STR	AaeL_AAEL004274, AAEL004274, AAEL004290	titin homolog
LOC5575904	224773715	0.248277	0.055905	3.81841	0.372409	0.105861	0.250865	G1247S	GA	2	DIV	AaeL_AAEL012145, AAEL012145	nuclear factor related to kappa-B-binding protein|uncharacterized protein LOC5575904
LOC5577475	314392596	0.00675676	0.151254	3.8182	0.0147051	0.262716	0.149684	I68V	TC	2	CYT/STR	AaeL_AAEL013222, AAEL013222	protein obstructor-E
LOC110675236	429281105	0.445002	0.195376	3.81044	0.493469	0.316345	0.437716	S569A	AC	2	LIPID		fatty acid synthase-like
LOC5578208	15087208	0.0681818	0.268336	3.81028	0.1437	0.392742	0.299199	T58I	GA	2	DIV	AaeL_AAEL003467, AAEL003467	27 kDa hemolymph protein
LOC5575133	124276870	0.418823	0.174836	3.79815	0.487856	0.277778	0.40526	S102T	TA	2	UNK	AaeL_AAEL000314, AAEL000314	uncharacterized protein LOC5575133
LOC5574420	69084724	0.200999	0.450772	3.78399	0.31493	0.494367	0.445816	T452A	TC	2	MIT	AaeL_AAEL011137, AAEL011137, AAEL017134	succinyl-CoA:3-ketoacid coenzyme A transferase 1, mitochondrial|succinyl-CoA:3-ketoacid-coenzyme A transferase, mitochondrial
LOC5569814	447911140	0.275481	0.0733639	3.78061	0.371	0.142683	0.285678	H16N	GT	2	UNK	AaeL_AAEL001316, AAEL001316	uncharacterized protein LOC5569814|secreted protein
LOC5573927	429232927	0.0723297	0.273634	3.77569	0.132653	0.398308	0.27985	F954Y	AT	2	LIPID	AaeL_AAEL002228, AAEL002228	fatty acid synthase
LOC5571666	299184581	0.132226	0	3.77463	0.243089	0	0.125906	A551V	CT	2	UNK	AaeL_AAEL001671, AAEL001671	uncharacterized protein LOC5571666
LOC5569697	460414301	0	0.132212	3.77425	0	0.203716	0.0853906	G9A	CG	2	UNK	AaeL_AAEL007849, AAEL007849	uncharacterized protein LOC5569697
LOC5566280	55408280	0	0.132121	3.77186	0	0.244898	0.140266	E566D	TG	2	TRP	AaeL_AAEL000751, AAEL000751	putative sodium/calcium exchanger 7
LOC5570953	2796038	0.369748	0.635599	3.76935	0.459184	0.457658	0.499997	N61D	TC	2	UNK	AaeL_AAEL008675, AAEL008675	uncharacterized protein LOC5570953
LOC5572654	275755897	0.692126	0.905303	3.7688	0.426344	0.171459	0.34434	E87D	GT	2	DIV	AaeL_AAEL001870, AAEL001870	glycerate kinase
LOC5568101	58730864	0.320168	0.584302	3.7569	0.43692	0.488862	0.489924	F351Y	TA	2	UNK	AaeL_AAEL006556, AAEL006556	uncharacterized protein LOC5568101
LOC5575748	422957700	0.630447	0.365128	3.75626	0.462187	0.466939	0.499644	S1446A	GT	2	UNK	AaeL_AAEL012057, AAEL012057	uncharacterized protein LOC5575748
LOC5566236	69160356	0	0.13146	3.75436	0	0.222865	0.107655	E336Q	GC	2	MIT	AaeL_AAEL005269, AAEL005269	cytochrome b-c1 complex subunit 2, mitochondrial
LOC5567355	316014588	0.93199	0.426165	13.7359	0.133092	0.489889	0.469359	T679S	AT	3	TRP	AaeL_AAEL006019, AAEL006019, AAEL008297, NaV, VGSC, VSCIIS6, Vssc, para	sodium channel protein para|voltage gated sodium channel DII|voltage sensitive sodium channel|voltage-dependent para-like sodium channel|voltage-gated para-like sodium channel|voltage-gated sodium channel domain IIS1-IIS6|voltage-gated sodium channel domain IS4-IS6|voltage-gated sodium channel, domain II|voltage-gated sodium channel, domain II S6
LOC5567355	316080722	0.898459	0.414411	12.2545	0.185976	0.484292	0.453337	L408V	CA	3	TRP	AaeL_AAEL006019, AAEL006019, AAEL008297, NaV, VGSC, VSCIIS6, Vssc, para	sodium channel protein para|voltage gated sodium channel DII|voltage sensitive sodium channel|voltage-dependent para-like sodium channel|voltage-gated para-like sodium channel|voltage-gated sodium channel domain IIS1-IIS6|voltage-gated sodium channel domain IS4-IS6|voltage-gated sodium channel, domain II|voltage-gated sodium channel, domain II S6
LOC5571908	338104868	0.0987942	0.577449	12.0882	0.15798	0.484602	0.468449	H1711P	TG	3	UNK	AaeL_AAEL009405, AAEL009391, AAEL009405	uncharacterized protein LOC5571908
LOC5572722	286844505	0.747619	0.272557	10.7655	0.35124	0.418958	0.494692	K1391R	CT	3	UNK	AaeL_AAEL009993, AAEL009993, SGS1	uncharacterized protein LOC5572722
LOC5574173	375960319	0.793706	0.324827	10.643	0.325737	0.438857	0.499471	E77D	AT	3	DIV	AAEL002285, AAEL002316	gastrula zinc finger protein XlCGF7.1
LOC5565808	325415064	0.867994	0.428571	10.1488	0.229385	0.489796	0.419782	S185G	GA	3	DIV		testis-specific serine/threonine-protein kinase 3
LOC5566303	309587107	0.549358	0.116729	10.1025	0.495317	0.204863	0.421658	K69R	AG	3	MIT	AaeL_AAEL005290, AAEL005290	stAR-related lipid transfer protein 7, mitochondrial
LOC5571028	326221846	0.834853	0.392694	9.90619	0.265261	0.478236	0.483404	K102Q	CA	3	CYT/STR	AaeL_AAEL008752, AAEL008752	titin
LOC5565808	325414918	0.642316	0.195008	9.8774	0.45739	0.318294	0.492084	H136R	AG	3	DIV		testis-specific serine/threonine-protein kinase 3
LOC23687987	29295249	0.187322	0.631122	9.79623	0.323591	0.466608	0.468184	F659Y	TA	3	PROT	AaeL_AAEL017567, AAEL017567	endothelin-converting enzyme 2|neprilysin-11
LOC5573368	314253438	0	0.3375	9.76707	0	0.44189	0.211704	V17G	TG	3	UNK	AaeL_AAEL010448, AAEL010448	uncharacterized protein LOC5573368
LOC5573341	67626492	0.189007	0.627404	9.58675	0.300312	0.474174	0.455926	V340D	AT	3	RRTT	AaeL_AAEL010440, AAEL010440	nucleolin
LOC5578196	221872617	0.754288	0.312718	9.4538	0.372409	0.430251	0.495	Q325*	TC	3	DIV		failed axon connections
LOC5566303	309587106	0.52251	0.114379	9.27858	0.498935	0.201657	0.414243	K69Q	AC	3	MIT	AaeL_AAEL005290, AAEL005290	stAR-related lipid transfer protein 7, mitochondrial
LOC5565808	325414929	0.611742	0.185619	9.16844	0.476947	0.30352	0.48639	E140K	GA	3	DIV		testis-specific serine/threonine-protein kinase 3
LOC5565808	325415142	0.623525	0.205942	8.7405	0.471004	0.33099	0.495166	V211I	GA	3	DIV		testis-specific serine/threonine-protein kinase 3
LOC5565808	325415163	0.756481	0.339545	8.55876	0.364275	0.44938	0.486511	P218A	GC	3	DIV		testis-specific serine/threonine-protein kinase 3
LOC5580236	316973327	0.882255	0.501425	8.3225	0.204386	0.499876	0.408577	S417G	CT	3	PROT	AaeL_AAEL012324, AAEL012324, AAEL013482	membrane-bound transcription factor site-2 protease
LOC5568570	960232	0.623858	0.222222	8.11021	0.46503	0.341655	0.488238	Q1384H	CA	3	RRTT	AaeL_AAEL001141, AAEL001141	transcriptional regulator ATRX homolog
LOC5575277	290976582	0.531814	0.310399	8.08228	0.600179	0.453304	0.580926	E706D	TAG	3	DIV	AaeL_AAEL011732, AAEL011732	trimethylguanosine synthase
LOC5565808	325415169	0.796589	0.400501	8.02252	0.318982	0.479025	0.463912	A220T	AG	3	DIV		testis-specific serine/threonine-protein kinase 3
LOC5570156	108012317	0	0.278563	7.96083	0	0.406645	0.242388	T57A	TC	3	TRP	AaeL_AAEL008135, AAEL008135, COG3_AEDAE, Cog3	conserved oligomeric Golgi complex subunit 3|COG complex subunit 3
LOC5570049	215983714	0.530702	0.154921	7.73622	0.497041	0.262188	0.437817	K336T	AC	3	DIV	AaeL_AAEL000196, AAEL000196	alkaline phosphatase, tissue-nonspecific isozyme
LOC5571908	338112636	0.0797747	0.421888	7.69292	0.141246	0.487683	0.396273	T1061I	GA	3	UNK	AaeL_AAEL009405, AAEL009391, AAEL009405	uncharacterized protein LOC5571908
LOC5578575	336021907	0.0169492	0.303465	7.55387	0.0336036	0.423764	0.259395	P169T	GT	3	RRTT	AaeL_AAEL013760, AAEL013760	homeobox protein vnd
LOC5578950	31836651	0.616964	0.940756	7.53791	0.470491	0.109386	0.353027	I131V	CT	3	DIV	AaeL_AAEL013918, AAEL013918	CD63 antigen
LOC5567059	114671118	0.510454	0.144958	7.51208	0.499377	0.247576	0.449828	S96T	GC	3	SigT	AaeL_AAEL005785, AAEL005785	LOW QUALITY PROTEIN: ras-like protein family member 10B
LOC5570566	224789217	0.169744	0.541189	7.46668	0.284668	0.498376	0.474141	L826I	TA	3	TRP	AaeL_AAEL008384, AAEL008384	ATP-binding cassette sub-family A member 3
LOC5568147	44819437	0.621693	0.238412	7.35717	0.473115	0.3648	0.487244	A619T	CT	3	CYT/STR	AaeL_AAEL006567, AAEL006567	mucin-5AC|rho GTPase-activating protein gacF
LOC23687892	318402543	0.867828	0.510529	7.31929	0.231111	0.499859	0.437809	L117V	GC	3	Redox	AaeL_AAEL017472, AAEL012401, AAEL017472	dehydrogenase/reductase SDR family member on chromosome X
LOC23687921	164683456	0.257176	0	7.25528	0.388264	0	0.260355	V309L	CG	3	DIV	AaeL_AAEL017501, AAEL017501	histidine-rich glycoprotein
LOC5578603	319909765	0.257108	0	7.25328	0.381437	0	0.28095	A4V	CT	3	UNK		uncharacterized protein LOC5578603
LOC5571180	236633600	0.651103	0.955357	7.20426	0.452897	0.0688776	0.326428	P180S	AG	3	UNK	AaeL_AAEL008876, AAEL008876	uncharacterized protein LOC5571180
LOC5577747	340159116	0.148397	0.506302	7.15997	0.252401	0.499995	0.465429	Q625P	AC	3	RRTT	AaeL_AAEL003293, AAEL003293	nucleolar GTP-binding protein 2
LOC5578798	65528842	0.579493	0.909265	7.04541	0.484143	0.163616	0.359092	S977P	CT	3	DIV	AaeL_AAEL003698, AAEL003698	patched domain-containing protein 3
LOC5580236	316973141	0.0712366	0.384265	6.88379	0.127835	0.47348	0.331831	I479V	TC	3	PROT	AaeL_AAEL012324, AAEL012324, AAEL013482	membrane-bound transcription factor site-2 protease
LOC5575514	317152424	0.0474402	0.339737	6.77333	0.0902731	0.436224	0.285252	A112T	CT	3	DIV	AaeL_AAEL011892, AAEL011892	guanine nucleotide-binding protein subunit beta-like protein 1
LOC5578603	319924676	0.515432	0.165758	6.74123	0.499664	0.270258	0.460603	L478V	CG	3	UNK		uncharacterized protein LOC5578603
LOC5577336	183867497	0.656504	0.949296	6.71078	0.452728	0.0914789	0.323784	V2136I	TC	3	CYT/STR	AaeL_AAEL000409, AAEL000409, AAEL000446	tight junction protein ZO-1
LOC5566051	347090436	0.572464	0.213891	6.67911	0.49107	0.324865	0.468479	S1354T	TA	3	CYT/STR	AaeL_AAEL005135, AAEL005135, AAEL005144	mucin-5AC
LOC5568051	15528507	0.888158	0.560784	6.65678	0.18483	0.494341	0.386176	V46A	CT	3	DIV	AaeL_AAEL006492, AAEL006492	sarcoplasmic calcium-binding protein
LOC5572083	345022778	0.1734	0.520539	6.59984	0.287994	0.498481	0.43834	N946S	TC	3	DIV	AaeL_AAEL009495, AAEL009495	DENN domain-containing protein 5A|DENN domain-containing protein 5B
LOC5566624	243480351	0.274966	0.0176648	6.57942	0.398848	0.033698	0.273356	I6T	TC	3	DIV	AaeL_AAEL000793, AAEL000793	venom allergen 3|putative secreted protein
LOC5563925	287471947	0.533166	0.866403	6.56316	0.496609	0.231111	0.412996	E16K	AG	3	TRP	AaeL_AAEL014228, AAEL014228	pickpocket protein 28
LOC5563818	292278081	0	0.233333	6.56007	0	0.35124	0.232422	E98K	CT	3	APOP	AaeL_AAEL014148, AAEL014148, CASPL1, demise	caspase-8|initiator caspase
LOC5578569	26617421	0.233333	0	6.56007	0.357778	0	0.147972	I145T	TC	3	TRP	AaeL_AAEL013756, AAEL013756	zinc transporter ZIP1
LOC5570235	10144783	0.164461	0.506805	6.52967	0.269064	0.5	0.404297	L897M	GT	3	RRTT	AaeL_AAEL008178, AAEL008178	probable DNA helicase MCM9
LOC5575089	281719799	0.424874	0.105605	6.50082	0.488836	0.192293	0.399524	K93Q	TG	3	DIV	AaeL_AAEL011634, AAEL011634	fibrinogen-like protein A
LOC5573267	372428048	0.0750404	0.374892	6.41806	0.134554	0.469013	0.364316	G848R	GA	3	RRTT	AaeL_AAEL010364, AAEL010364	polycomb protein Asx
LOC5566877	362691383	0.502747	0.165535	6.36641	0.499971	0.275615	0.457776	G440A	GC	3	SigT	AaeL_AAEL000811, AAEL000811, GPRMTH7	probable G-protein coupled receptor Mth-like 14
LOC5575089	281719270	0.606349	0.252996	6.34874	0.475405	0.383249	0.487714	G269E	CT	3	DIV	AaeL_AAEL011634, AAEL011634	fibrinogen-like protein A
LOC5575806	160413815	0.774423	1	6.3374	0.348998	0	0.220641	V174F	AC	3	DIV	AaeL_AAEL012075, AAEL012075	methenyltetrahydrofolate synthase domain-containing protein
LOC5571876	297829658	0.0249938	0.280163	6.28187	0.0488823	0.403292	0.264078	T34I	CT	3	DIV	AaeL_AAEL009360, AAEL009360, PLK-4, PLK4_AEDAE, SAK	serine/threonine-protein kinase PLK4|Polo-like kinase 4|Serine/threonine-protein kinase SAK
LOC5579179	84775334	0.0247525	0.278319	6.24245	0.0401438	0.401456	0.245771	K452E	TC	3	RRTT	AaeL_AAEL003868, AAEL003868	DNA repair protein complementing XP-C cells homolog
LOC5575514	317152340	0.0455695	0.315887	6.16848	0.0935232	0.433884	0.25362	K140E	TC	3	DIV	AaeL_AAEL011892, AAEL011892	guanine nucleotide-binding protein subunit beta-like protein 1
LOC5578295	195388501	0.408183	0.0906835	6.149	0.488588	0.160999	0.348753	K134N	CAG	3	UNK	AaeL_AAEL013621, AAEL013621	uncharacterized protein LOC5578295
LOC5570221	9653945	0.226712	0.569687	6.13884	0.338645	0.492694	0.468592	I291V	AG	3	DIV	AaeL_AAEL008165, AAEL008165	arrestin domain-containing protein 2
LOC5564744	313968144	0.658976	0.939556	6.13664	0.445094	0.115089	0.338628	L608Q	TA	3	DIV	AaeL_AAEL010449, AAEL010449, AAEL014598	huntingtin-interacting protein 1
LOC5570976	95747148	0.922571	0.631807	6.10892	0.141274	0.465821	0.350417	I1046N	TA	3	UNK	AaeL_AAEL008714, AAEL008714	uncharacterized protein CG7065|putative mediator of rna polymerase ii transcription subunit 29
LOC5567347	315384098	1	0.783333	6.08366	0	0.347401	0.255329	P302Q	AC	3	UNK	AaeL_AAEL006017, AAEL006017	uncharacterized protein LOC5567347
LOC5567347	315384098	1	0.783333	6.08366	0	0.347401	0.255329	P302Q	AC	3	UNK	AaeL_AAEL006017, AAEL006017	uncharacterized protein LOC5567347
LOC5571908	338114590	0.0921409	0.389993	6.07156	0.15863	0.475725	0.356372	T410S	TA	3	UNK	AaeL_AAEL009405, AAEL009391, AAEL009405	uncharacterized protein LOC5571908
LOC5579175	84687143	0.82896	0.500538	6.06121	0.291078	0.49993	0.465501	R1089K	TC	3	RRTT	AaeL_AAEL003893, AAEL003893	DNA repair protein complementing XP-C cells homolog
LOC5564658	94390445	0.567851	0.878374	6.03415	0.491493	0.203171	0.394239	N203S	CT	3	UNK	AaeL_AAEL004382, AAEL004382	uncharacterized protein LOC5564658|putative 41 kDa salivary secreted protein
LOC5573966	51931726	0.550427	0.865409	6.01425	0.495868	0.215451	0.408163	T979A	CT	3	APOP	AaeL_AAEL010827, AAEL010827	protein RRP5 homolog
LOC5570021	213030809	0.867921	0.555556	5.9663	0.228691	0.493827	0.396131	V14I	AG	3	RRTT	AaeL_AAEL000215, AAEL000215	ribonuclease P protein subunit p29
LOC5579843	219797246	0.340877	0.0641403	5.95081	0.44913	0.104938	0.33871	V169I	GA	3	TRP	AaeL_AAEL005865, AAEL005865	proton-coupled amino acid transporter-like protein CG1139
LOC5578083	348414740	0.38748	0.0933163	5.94708	0.475088	0.167452	0.371487	I507V	AG	3	DIV	AaeL_AAEL003413, AAEL003413	spondin-1
LOC5563925	287471944	0.486088	0.813527	5.91647	0.49973	0.303828	0.451722	I15F	TA	3	TRP	AaeL_AAEL014228, AAEL014228	pickpocket protein 28
LOC5575998	144885836	0.0784314	0.362939	5.91076	0.133453	0.46455	0.350623	I1093L	TG	3	CYT/STR	AaeL_AAEL002771, AAEL002771	centrosome-associated zinc finger protein CP190
LOC5572402	319650898	0.454038	0.140498	5.91009	0.496368	0.243143	0.443299	H324Q	GC	3	DIV	AaeL_AAEL009786, AAEL009786	zinc finger protein 853
LOC5567058	114543091	0.0120482	0.23913	5.89851	0.0243865	0.363894	0.17112	W182L	CA	3	CSR		GPROR7
LOC5565808	325415127	0.992958	0.772569	5.89575	0.0153248	0.35124	0.174459	Q206*	TC	3	DIV		testis-specific serine/threonine-protein kinase 3
LOC5575089	281719793	0.416315	0.114049	5.89066	0.48631	0.203618	0.40473	E95K	CT	3	DIV	AaeL_AAEL011634, AAEL011634	fibrinogen-like protein A
LOC5577138	278521317	0.26452	0.0240385	5.88547	0.359034	0.0469212	0.231562	V334A	TC	3	PROT	AaeL_AAEL003111, AAEL003111	carboxypeptidase N subunit 2
LOC5575514	317152275	0.0463768	0.335177	5.86922	0.0955658	0.442077	0.283581	D161E	GCT	3	DIV	AaeL_AAEL011892, AAEL011892	guanine nucleotide-binding protein subunit beta-like protein 1
LOC5564640	92967106	0.232691	0.00980392	5.8612	0.353299	0.0162591	0.222963	A518V	GA	3	RRTT		LOW QUALITY PROTEIN: SWI/SNF complex subunit SMARCC2
LOC5570226	9775763	0.207946	0	5.83735	0.32463	0	0.192189	E100V	TA	3	UNK	AaeL_AAEL008183, AAEL008183	uncharacterized protein LOC5570226
LOC5577338	184140645	0.177079	0.498829	5.82088	0.293771	0.499938	0.437307	D177E	CA	3	DIV	AaeL_AAEL000442, AAEL000442, oskar	maternal effect protein oskar
LOC5571177	236705673	0.353668	0.0749729	5.80477	0.459515	0.154848	0.305651	D22E	CG	3	DIV	AaeL_AAEL008863, AAEL008863	protein regulator of cytokinesis 1
LOC5564744	313968111	0.640302	0.933937	5.77864	0.467659	0.122843	0.343366	M619T	GAT	3	DIV	AaeL_AAEL010449, AAEL010449, AAEL014598	huntingtin-interacting protein 1
LOC5574958	312840633	0.00966892	0.229024	5.76569	0.0197025	0.352653	0.220279	G328E	GA	3	UNK	AaeL_AAEL013455, AAEL013455	uncharacterized protein LOC5574958
LOC23687740	347295852	0.87038	0.56684	5.74134	0.223648	0.491241	0.388055	V152I	AG	3	MET	AaeL_AAEL017320, AAEL017320, FOHSDR-2	farnesol dehydrogenase-like|NADP+-dependent farnesol dehydrogenase 2
LOC5575389	288718145	0.440795	0.770545	5.73711	0.494649	0.364515	0.470165	V494A	GA	3	UNK	AaeL_AAEL011788, AAEL011788	uncharacterized protein LOC5575389
LOC5578103	349300222	0.284495	0.0367647	5.73596	0.401606	0.0762157	0.271731	I107V	AG	3	DIV	AaeL_AAEL003430, AAEL003430	regulator of microtubule dynamics protein 1
LOC5575399	35998118	0.670609	0.3342	5.70793	0.443904	0.444444	0.499997	T226A	CT	3	DIV	AaeL_AAEL011798, AAEL011798	venom allergen 5
LOC5576652	23991089	0.532517	0.207734	5.70533	0.497238	0.328621	0.47037	D320E	AT	3	UNK	AaeL_AAEL012683, AAEL012683	uncharacterized protein LOC5576652
LOC5570576	224921708	0.314702	0.0546918	5.66567	0.411011	0.104574	0.310723	D1179H	CG	3	UNK	AaeL_AAEL008377, AAEL008377	uncharacterized protein LOC5570576
LOC5578524	254490385	0.265114	0.595804	5.63286	0.385362	0.48179	0.49471	I436V	TC	3	CYT/STR	AaeL_AAEL013730, AAEL013730	actin cytoskeleton-regulatory complex protein pan1
LOC5564589	368111693	0.218985	0.543012	5.62313	0.340492	0.496641	0.4451	P308A	CG	3	RRTT	AaeL_AAEL004345, AAEL004345	cysteine--tRNA ligase, cytoplasmic
LOC5572402	319650592	0.199282	0	5.59461	0.31809	0	0.19947	D426E	AT	3	DIV	AaeL_AAEL009786, AAEL009786	zinc finger protein 853
LOC110677844	215799160	0.326984	0.0633991	5.59008	0.440918	0.119174	0.32699	H137Q	CA	3	UNK		uncharacterized protein LOC110677844
LOC5572401	319629549	0.500969	0.185366	5.58588	0.499256	0.304125	0.437849	T545A	AG	3	DIV	AaeL_AAEL014633, AAEL014633	inner centromere protein
LOC5570156	108011438	0.0128205	0.229136	5.56458	0.0198655	0.356629	0.215972	A256S	CA	3	TRP	AaeL_AAEL008135, AAEL008135, COG3_AEDAE, Cog3	conserved oligomeric Golgi complex subunit 3|COG complex subunit 3
LOC5571975	321545833	0.268231	0.0323774	5.51417	0.397026	0.062435	0.282352	Q243K	CA	3	UNK	AaeL_AAEL009454, AAEL009454	uncharacterized protein LOC5571975
LOC5566905	362449413	0.196296	0	5.51142	0.302866	0	0.207612	A9V	CT	3	CSR	AaeL_AAEL000835, AAEL000835	general odorant-binding protein 45-like
LOC5577177	310593672	0.195772	0	5.49683	0.309414	0	0.157104	V327D	TA	3	RRTT	AaeL_AAEL013048, AAEL013048	zinc finger and SCAN domain-containing protein 31
LOC5575013	107352046	0.0148148	0.229956	5.46181	0.031488	0.35503	0.195975	G202E	CT	3	DIV	AaeL_AAEL011576, AAEL008122, AAEL011576	selenocysteine insertion sequence-binding protein 2
LOC5563617	105081458	0.193966	0	5.44661	0.296288	0	0.187852	V150F	GT	3	PROT	AaeL_AAEL000059, AAEL000059, AAEL015430, CLIPB19	serine protease easter
LOC23687740	347295847	0.858477	0.561222	5.44	0.243194	0.492475	0.392983	R150T	CG	3	MET	AaeL_AAEL017320, AAEL017320, FOHSDR-2	farnesol dehydrogenase-like|NADP+-dependent farnesol dehydrogenase 2
LOC5572085	344946152	0.777049	0.459635	5.41637	0.353715	0.496713	0.464048	L249F	TC	3	DIV	AaeL_AAEL009502, AAEL009502	zinc finger protein 234
LOC5570298	87730347	0.0864289	0.357259	5.39336	0.160451	0.464935	0.363555	Q91H	GT	3	DIV	AaeL_AAEL008222, AAEL008222	pancreatic lipase-related protein 2
LOC110679183	57879990	0.254895	0.0279365	5.38597	0.379132	0.0516877	0.296865	D328N	CT	3	UNK		uncharacterized protein LOC110679183
LOC5563925	287471954	0.596818	0.882313	5.37391	0.481666	0.206655	0.385412	E18G	GA	3	TRP	AaeL_AAEL014228, AAEL014228	pickpocket protein 28
LOC5580157	201661535	0.646036	0.322274	5.33464	0.45908	0.440576	0.499394	M403I	GA	3	RRTT	AaeL_AAEL011395, AAEL011395	probable glutamine--tRNA ligase
LOC5577179	310515684	0.742349	0.969662	5.32889	0.383769	0.0583886	0.256651	F320L	GA	3	MET	AaeL_AAEL013046, AAEL013046	glucose dehydrogenase [FAD, quinone]
LOC5577179	310515798	0.746036	0.971223	5.31249	0.393348	0.0555102	0.243352	E282Q	GC	3	MET	AaeL_AAEL013046, AAEL013046	glucose dehydrogenase [FAD, quinone]
LOC110679554	171318386	0.416667	0.129224	5.29657	0.489244	0.223795	0.352792	P138S	GA	3	Redox	AaeL_AAEL007010, AAEL007010, CYP6AG4	probable cytochrome P450 28a5
LOC5570776	29508519	0.188301	0	5.28969	0.3078	0	0.158462	L113S	AG	3	Detox	AaeL_AAEL008532, AAEL008532	acetylcholinesterase
LOC5565339	322269881	0.304563	0.0566217	5.28613	0.436962	0.104212	0.307528	A307G	GC	3	UNK	AaeL_AAEL014825, AAEL014825	uncharacterized protein LOC5565339
LOC23687635	112553718	0.627351	0.900794	5.27875	0.466558	0.169922	0.396235	K465R	GA	3	Redox	AaeL_AAEL017215, AAEL017215, CYP325U1	cytochrome P450 (CYP325U1)
LOC110677920	264343568	0	0.187815	5.27625	0	0.305818	0.159272	D106H	GC	3	UNK		uncharacterized protein LOC110677920
LOC5571908	338115261	0.0671698	0.350274	5.27514	0.103349	0.454012	0.338754	D207E	AGT	3	UNK	AaeL_AAEL009405, AAEL009391, AAEL009405	uncharacterized protein LOC5571908
LOC5565808	325415232	0.165634	0.464286	5.26298	0.276899	0.497449	0.416942	R241G	CG	3	DIV		testis-specific serine/threonine-protein kinase 3
LOC5576762	322098208	0.677111	0.356808	5.23418	0.442443	0.459184	0.495109	S1304T	TA	3	UNK	AaeL_AAEL012745, AAEL012745	uncharacterized protein LOC5576762
LOC23687635	112553724	0.611897	0.889052	5.22677	0.473088	0.194824	0.412642	I467T	CT	3	Redox	AaeL_AAEL017215, AAEL017215, CYP325U1	cytochrome P450 (CYP325U1)
LOC110678839	375908860	0.238741	0.551813	5.22504	0.358792	0.494854	0.468148	S147G	AG	3	DIV	AaeL_AAEL002318, AAEL002318	zinc finger C4H2 domain-containing protein-like
LOC5572402	319650959	0.519256	0.211681	5.20116	0.499146	0.3225	0.4712	V304A	AG	3	DIV	AaeL_AAEL009786, AAEL009786	zinc finger protein 853
LOC5579293	92936353	0.308419	0.0610526	5.18238	0.430939	0.115503	0.327293	Q2360K	GI	3	UNK	AaeL_AAEL004381, AAEL004363, AAEL004381	uncharacterized protein LOC5579293
LOC5565427	392140420	0.0468079	0.283481	5.18228	0.0896886	0.40238	0.290855	T972M	GA	3	IMM	AaeL_AAEL000633, AAEL000633, TOLL8	toll-like receptor Tollo
LOC5573308	13370074	0.298752	0.0562864	5.14114	0.421502	0.104938	0.279689	S210T	AT	3	Redox	AaeL_AAEL010396, AAEL010396	soma ferritin
LOC5575326	256669087	0.560339	0.248894	5.14106	0.493511	0.373886	0.489871	N186H	AC	3	IMM	AaeL_AAEL002601, AAEL002601, CLIPA1	proclotting enzyme|suppressor of tumorigenicity 14 protein
LOC5570887	172939642	0.0520422	0.291021	5.1324	0.101403	0.412501	0.276521	E774G	AG	3	UNK	AaeL_AAEL008659, AAEL008659, AAEL008661, AMPK-gamma	uncharacterized protein LOC5570887|AMPK-gamma subunit
LOC5578028	79306341	0.510458	0.206557	5.12898	0.499777	0.32	0.456604	W226*	CT	3	DIV	AaeL_AAEL003389, AAEL003389, ATT	attacin-B
LOC5571211	336730130	0.026936	0.242979	5.1088	0.0477326	0.367093	0.22118	I1305V	AG	3	UNK	AaeL_AAEL008894, AAEL008894	uncharacterized protein LOC5571211
LOC110677659	36851982	0.579404	0.267978	5.07919	0.48179	0.390743	0.4838	T94R	GC	3	MET		high affinity cGMP-specific 3',5'-cyclic phosphodiesterase 9A-like
LOC5574406	38010572	0.011236	0.207995	5.07311	0.0238061	0.327659	0.1894	T335S	GC	3	DIV	AaeL_AAEL011134, AAEL011134	UPF0505 protein CG8202
LOC110679843	17262501	0.015625	0.217459	5.06171	0.0475907	0.341501	0.210949	G13D	GA	3	UNK		uncharacterized protein K02A2.6-like
LOC5566894	362432014	0.41009	0.131029	5.04957	0.482059	0.233505	0.413728	T246A	AG	3	CSR	AaeL_AAEL000796, AAEL000796	general odorant-binding protein 45-like
LOC5565074	70177696	0	0.207795	5.03538	0	0.335775	0.193814	M591I	CAT	3	MET	AaeL_AAEL014710, AAEL014710, AAEL017128	maltase 2
LOC5574949	313326226	0.283991	0.595183	5.03263	0.420858	0.481509	0.491724	H247Q	AC	3	PROT	AaeL_AAEL011555, AAEL011555	seminal metalloprotease 1
LOC5570235	10145167	0.713653	0.948499	5.02986	0.409461	0.0970429	0.286243	S769P	GA	3	RRTT	AaeL_AAEL008178, AAEL008178	probable DNA helicase MCM9
LOC5567446	307417887	0.233456	0.538557	5.02878	0.357845	0.496512	0.468362	K286R	AG	3	TRP	AaeL_AAEL006096, AAEL006096	gelsolin
LOC23687987	29293838	0.22035	0.0175003	5.02812	0.342653	0.0331398	0.179468	R267K	GA	3	PROT	AaeL_AAEL017567, AAEL017567	endothelin-converting enzyme 2|neprilysin-11
LOC5572085	344945682	0.750993	0.444146	5.01481	0.37665	0.492638	0.474988	K92I	TA	3	DIV	AaeL_AAEL009502, AAEL009502	zinc finger protein 234
LOC5570235	10145156	0.706333	0.943964	5.01316	0.414951	0.105551	0.295805	D772E	TA	3	RRTT	AaeL_AAEL008178, AAEL008178	probable DNA helicase MCM9
LOC5572085	344945585	0.330822	0.0789056	4.99274	0.442798	0.143133	0.336735	F60I	TA	3	DIV	AaeL_AAEL009502, AAEL009502	zinc finger protein 234
LOC5567376	33603578	0.680541	0.368975	4.98884	0.434395	0.465845	0.499314	N244S	GA	3	MET	AaeL_AAEL006039, AAEL006039	dehydrodolichyl diphosphate synthase complex subunit DHDDS
LOC23687987	29293925	0.449243	0.754285	4.97793	0.496748	0.375	0.47051	K296R	GA	3	PROT	AaeL_AAEL017567, AAEL017567	endothelin-converting enzyme 2|neprilysin-11
LOC5568052	15372809	0.544636	0.240385	4.97713	0.496327	0.35503	0.470416	F124V	TG	3	SigT	AaeL_AAEL006490, AAEL006490, GPRCAL2	calcitonin gene-related peptide type 1 receptor
LOC5574076	359902513	0.781579	0.982334	4.96463	0.345679	0.0342753	0.21823	E586D	CA	3	DIV	AaeL_AAEL010914, AAEL010914, AAEL010916	tyrosine-protein phosphatase non-receptor type 23
LOC5579175	84687131	0.781051	0.481258	4.95268	0.343083	0.498126	0.477738	P1093L	AG	3	RRTT	AaeL_AAEL003893, AAEL003893	DNA repair protein complementing XP-C cells homolog
LOC5575189	112367043	0.179167	0.470047	4.95119	0.293367	0.499293	0.439453	R244K	CT	3	UNK	AaeL_AAEL000347, AAEL000347	uncharacterized protein LOC5575189
LOC5565742	322745578	0.349446	0.0922256	4.93502	0.47156	0.168038	0.388928	V448M	GA	3	UNK	AaeL_AAEL004948, AAEL004948	uncharacterized protein LOC5565742
LOC23687940	307795648	0.175161	0	4.92858	0.292346	0	0.15879	H334N	CA	3	PROT		trypsin 5G1-like
LOC5579843	219798075	0.520736	0.812801	4.92823	0.498592	0.307441	0.431364	M408V	GA	3	TRP	AaeL_AAEL005865, AAEL005865	proton-coupled amino acid transporter-like protein CG1139
LOC5567647	25221292	0.264052	0.0412913	4.92452	0.388955	0.0829463	0.260815	A477T	GA	3	CYT/STR		LOW QUALITY PROTEIN: spectrin beta chain, non-erythrocytic 5
LOC5563988	167007383	0.380907	0.113701	4.92426	0.469264	0.209391	0.383847	M234L	AT	3	DIV	AaeL_AAEL004026, AAEL004026	zinc finger protein 883
LOC5574815	338206068	0.47067	0.770366	4.89998	0.495317	0.353126	0.468094	M220I	AC	3	RRTT	AaeL_AAEL002488, AAEL002488	ATP-dependent RNA helicase Ddx1
LOC5570976	95747098	0.843033	0.560542	4.89857	0.265298	0.493763	0.427088	G1063S	TC	3	UNK	AaeL_AAEL008714, AAEL008714	uncharacterized protein CG7065|putative mediator of rna polymerase ii transcription subunit 29
LOC5563637	103559189	0	0.173611	4.88626	0	0.275734	0.177372	S110T	AT	3	IMM	AaeL_AAEL000057, AAEL000057, TOLL5B	protein toll|toll-related protein Toll1x
LOC5567669	62659587	0.237171	0.536773	4.86524	0.354596	0.497882	0.467346	F4I	TA	3	TRP	AaeL_AAEL006258, AAEL006258	sodium channel protein Nach
LOC110677693	42382967	0.172807	0	4.86432	0.302264	0	0.186441	F279Y	TA	3	DIV		leucine-rich repeat-containing protein 23-like
LOC5570021	213030800	0.903488	0.647028	4.85513	0.173681	0.456353	0.328779	A11S	TG	3	RRTT	AaeL_AAEL000215, AAEL000215	ribonuclease P protein subunit p29
LOC5580268	310446551	0.474946	0.186291	4.84373	0.497041	0.303828	0.430517	S409P	TC	3	LIPID		sphingolipid delta(4)-desaturase DES1
LOC5572945	148606012	0.300687	0.0638853	4.84038	0.415522	0.118172	0.320875	T283M	CT	3	DIV	AaeL_AAEL010162, AAEL010162	tetratricopeptide repeat protein 39C
LOC5567302	227869773	0.692105	0.386654	4.8328	0.42671	0.473055	0.489796	A14V	TC	3	LIPID	AaeL_AAEL005957, AAEL005957	phospholipase B1, membrane-associated
LOC5579175	84687116	0.730299	0.428169	4.82146	0.390743	0.491938	0.493768	Q1098L	AT	3	RRTT	AaeL_AAEL003893, AAEL003893	DNA repair protein complementing XP-C cells homolog
LOC5578103	349300180	0.582418	0.27963	4.8135	0.492564	0.403817	0.489095	L93I	CA	3	DIV	AaeL_AAEL003430, AAEL003430	regulator of microtubule dynamics protein 1
LOC5564352	117500519	0.0428054	0.262636	4.80928	0.0779201	0.383831	0.227608	F452L	AT	3	TRP	AaeL_AAEL004213, AAEL004213	monocarboxylate transporter 7
LOC5571034	326023789	0.934358	0.697855	4.80058	0.127604	0.427107	0.31534	N522S	CT	3	MET	AaeL_AAEL008757, AAEL008757	Carboxy/choline esterase Alpha Esterase (CCEunk7O)
LOC5564637	94215418	0.776708	0.482118	4.79324	0.352462	0.498948	0.453098	V761M	TC	3	CYT/STR	AaeL_AAEL004352, AAEL004352	centrosomal protein of 120 kDa
LOC5564320	12438522	0.778788	0.977778	4.7744	0.338585	0.0493511	0.219872	L167M	AT	3	DIV	AaeL_AAEL000583, AAEL000583	peroxisome assembly factor 2
LOC5570565	224819794	0.524646	0.230966	4.73455	0.498569	0.371454	0.469105	S2368F	CT	3	TRP		ATP-binding cassette sub-family A member 3
LOC5578484	164033347	0.715234	0.415584	4.71754	0.400599	0.488365	0.488666	D204N	AG	3	UNK	AaeL_AAEL000515, AAEL000515	uncharacterized protein LOC5578484
LOC5579844	219777213	0	0.167402	4.71723	0	0.279973	0.142603	R422K	GA	3	TRP	AaeL_AAEL005854, AAEL005854	proton-coupled amino acid transporter-like protein CG1139
LOC5575272	291182106	0.446234	0.167945	4.7009	0.491557	0.280654	0.428693	E29A	TG	3	RRTT	AaeL_AAEL011733, AAEL011733	transcription elongation regulator 1
LOC5575425	203438776	0.439309	0.162837	4.6928	0.493827	0.264232	0.423613	S685P	TC	3	TRP	AaeL_AAEL011825, AAEL011825	aryl hydrocarbon receptor|aryl hydrocarbon receptor protein 1
LOC5579175	84687132	0.770573	0.479062	4.68437	0.354596	0.497743	0.481241	V1093L	GC	3	RRTT	AaeL_AAEL003893, AAEL003893	DNA repair protein complementing XP-C cells homolog
LOC5569650	151709889	0.0929406	0.340909	4.67834	0.169556	0.448852	0.331247	N302S	TC	3	PROT	AaeL_AAEL007797, AAEL007797	E3 ubiquitin-protein ligase RNF220
LOC5565738	322595783	0.352433	0.100612	4.67779	0.448242	0.181614	0.353088	N707D	AG	3	DIV	AaeL_AAEL004940, AAEL004940	zinc finger protein 729|Zinc finger protein 70
LOC5570576	224921702	0.279759	0.0554214	4.66445	0.379504	0.104938	0.285512	A1181S	CA	3	UNK	AaeL_AAEL008377, AAEL008377	uncharacterized protein LOC5570576
LOC5575007	107317666	0.659273	0.35926	4.65758	0.43725	0.456029	0.499907	I268V	TC	3	CSR	AAEL011571	gustatory receptor Gr14
LOC5571908	338115851	0.0644928	0.294683	4.65166	0.134702	0.413194	0.317702	P11A	GC	3	UNK	AaeL_AAEL009405, AAEL009391, AAEL009405	uncharacterized protein LOC5571908
LOC5565219	247862617	0.00986842	0.189415	4.64819	0.0191065	0.29227	0.182785	Q174K	CA	3	UNK	AaeL_AAEL004659, AAEL004659	uncharacterized protein LOC5565219
LOC5566929	115045855	0.192842	0	4.63436	0.322578	0	0.186942	N43S	TAC	3	CSR	AaeL_AAEL005711, AAEL005711	ejaculatory bulb-specific protein 3
LOC5567474	378685049	0.220787	0.508638	4.62855	0.343405	0.499584	0.462926	V81A	AG	3	DIV	AaeL_AAEL000946, AAEL000946	putative GPI-anchored protein pfl2
LOC5574406	38010548	0	0.164081	4.62717	0	0.264368	0.137985	D343V	TA	3	DIV	AaeL_AAEL011134, AAEL011134	UPF0505 protein CG8202
LOC5579842	219807079	0.21875	0.024003	4.60598	0.349289	0.0484131	0.194322	G193E	GA	3	TRP	AaeL_AAEL005855, AAEL005855	proton-coupled amino acid transporter-like protein CG1139
LOC5578090	348702577	0.251015	0.542062	4.58723	0.378145	0.496505	0.469998	Q375K	CA	3	DIV		LOW QUALITY PROTEIN: lamin Dm0
LOC5574173	375960310	0.291722	0.586974	4.58621	0.417823	0.483945	0.498785	S74R	TA	3	DIV	AAEL002285, AAEL002316	gastrula zinc finger protein XlCGF7.1
LOC5573579	178233520	0.509769	0.223696	4.56889	0.498906	0.343405	0.468843	S244G	TC	3	UNK	AaeL_AAEL002094, AAEL002094	uncharacterized protein LOC5573579
LOC5570660	354397918	0.260227	0.0464814	4.56315	0.3697	0.0891898	0.236379	M233L	AT	3	DIV	AaeL_AAEL008483, AAEL008483	MOXD1 homolog 2
LOC5565341	322202504	0.379653	0.123289	4.53199	0.4662	0.219691	0.396529	T24M	CT	3	UNK	AaeL_AAEL014827, AAEL014827	uncharacterized protein LOC5565341
LOC5576333	97622527	0.581592	0.289098	4.51914	0.490779	0.424561	0.49926	G1103A	GC	3	DIV	AaeL_AAEL000388, AAEL000388	isoleucine--tRNA ligase, cytoplasmic
LOC5570049	215984313	0.160068	0	4.51865	0.27258	0	0.159688	I416T	TC	3	DIV	AaeL_AAEL000196, AAEL000196	alkaline phosphatase, tissue-nonspecific isozyme
LOC5572139	250689443	0.0590038	0.279017	4.48063	0.110727	0.405482	0.263875	T587S	AT	3	IMM	AaeL_AAEL009551, AAEL009551, TOLL11	toll-like receptor Tollo
LOC5576651	23978065	0.094422	0.335537	4.47864	0.172336	0.447293	0.352653	K188Q	AC	3	UNK	AaeL_AAEL012688, AAEL012688	uncharacterized protein LOC5576651
LOC5565341	322202497	0.385586	0.129132	4.4744	0.472012	0.228532	0.410085	T22A	AG	3	UNK	AaeL_AAEL014827, AAEL014827	uncharacterized protein LOC5565341
LOC5565808	325415586	0.481922	0.203869	4.46316	0.498958	0.326605	0.461383	D359N	GA	3	DIV		testis-specific serine/threonine-protein kinase 3
LOC5565737	323130760	0.985612	0.807117	4.46131	0.0283629	0.313531	0.182956	S292L	AG	3	UNK	AaeL_AAEL004955, AAEL004955	uncharacterized protein LOC5565737
LOC5565737	323131191	0.974747	0.784448	4.44961	0.0508744	0.337031	0.213547	Q148H	AC	3	UNK	AaeL_AAEL004955, AAEL004955	uncharacterized protein LOC5565737
LOC5575798	160237970	0.0763975	0.306379	4.44757	0.131522	0.424383	0.319667	I63M	AC	3	MIT	AaeL_AAEL012077, AAEL012077	pyruvate dehydrogenase phosphatase regulatory subunit, mitochondrial
LOC5572402	319651115	0.807967	0.869893	4.44258	0.622001	0.523108	0.618523	C252F	GAC	3	DIV	AaeL_AAEL009786, AAEL009786	zinc finger protein 853
LOC5565734	322619293	0.314359	0.0815659	4.44246	0.438443	0.157362	0.306159	G492A	CG	3	TRP	AaeL_AAEL004954, AAEL004954, AAEL004968	ATP-binding cassette sub-family A member 13
LOC5571199	337602101	0.581367	0.29208	4.42958	0.483892	0.413434	0.488731	D104E	TA	3	DIV	AaeL_AAEL008896, AAEL008896, AAEL008897	zinc finger protein 350
LOC110677920	264343577	0	0.156208	4.4146	0	0.263114	0.130502	N109H	AC	3	UNK		uncharacterized protein LOC110677920
LOC5567647	25231571	0.0820052	0.313641	4.4058	0.144673	0.432316	0.292912	I3542T	TC	3	CYT/STR		LOW QUALITY PROTEIN: spectrin beta chain, non-erythrocytic 5
LOC5578511	117605348	0	0.155405	4.393	0	0.283743	0.139934	I18V	AG	3	UNK	AaeL_AAEL013720, AAEL013720	uncharacterized protein LOC5578511
LOC5575404	113468534	0	0.155056	4.3836	0	0.272921	0.184929	V187I	CT	3	MET	AaeL_AAEL011808, AAEL011808	glucose dehydrogenase [FAD, quinone]
LOC5565810	324224851	0.279846	0.0618622	4.37499	0.397288	0.116059	0.303361	A645V	CT	3	DIV	AaeL_AAEL005002, AAEL005002	roundabout homolog 2
LOC5575325	256632147	0.154729	0	4.37482	0.270344	0	0.160273	V282A	TC	3	PROT	AaeL_AAEL002580, AAEL002580	transmembrane protease serine 2
LOC5565732	323132651	0.973217	0.784372	4.36802	0.0545026	0.335056	0.225304	E17D	TA	3	UNK	AaeL_AAEL004960, AAEL004960	uncharacterized protein LOC5565732
LOC5570156	108012022	0.0612378	0.29916	4.36763	0.126004	0.455525	0.282715	M61T	ACG	3	TRP	AaeL_AAEL008135, AAEL008135, COG3_AEDAE, Cog3	conserved oligomeric Golgi complex subunit 3|COG complex subunit 3
LOC5577785	44260549	0.153865	0	4.35158	0.25919	0	0.169244	P203L	CT	3	UNK	AaeL_AAEL013375, AAEL013375	uncharacterized protein LOC5577785
LOC5574949	313326485	0.0601468	0.276007	4.34998	0.121704	0.40215	0.268531	T161I	GA	3	PROT	AaeL_AAEL011555, AAEL011555	seminal metalloprotease 1
LOC5574668	140182727	0.931985	0.963417	4.34158	0.558599	0.308548	0.454286	S375A	GAC	3	DIV	AaeL_AAEL011308, AAEL011308	serine/threonine-protein kinase/endoribonuclease IRE1
LOC5565508	275028476	0.0473485	0.253394	4.33928	0.0932334	0.373169	0.224766	V232A	AG	3	RRTT		60S ribosomal protein L18a
LOC5565732	323132736	0.957955	0.756199	4.33925	0.0857376	0.364646	0.242292	T46S	TA	3	UNK	AaeL_AAEL004960, AAEL004960	uncharacterized protein LOC5565732
LOC5570049	215984284	0.153396	0	4.33898	0.263672	0	0.155128	D406E	TA	3	DIV	AaeL_AAEL000196, AAEL000196	alkaline phosphatase, tissue-nonspecific isozyme
LOC5570148	107431387	0.0125	0.183804	4.33027	0.0327778	0.286578	0.167844	S839T	GC	3	MIT	AaeL_AAEL008134, AAEL008134	ATP-binding cassette sub-family B member 6, mitochondrial
LOC5579800	268066242	0.371659	0.123512	4.31921	0.465236	0.230591	0.379458	N514S	AG	3	DIV	AaeL_AAEL003953, AAEL003953	MAP/microtubule affinity-regulating kinase 3|serine/threonine-protein kinase MARK1|serine/threonine-protein kinase MARK2
LOC5566067	345444926	0.60625	0.319704	4.31573	0.479648	0.437396	0.495557	R254K	GA	3	DIV		arylsulfatase B
LOC5575021	107285770	0.589728	0.84798	4.31293	0.48775	0.253838	0.421357	E46D	TA	3	DIV	AaeL_AAEL011573, AAEL011569, AAEL011573	uncharacterized protein LOC5575021
LOC5567265	139384839	0.0277778	0.215438	4.30926	0.0580874	0.338688	0.195159	S1817P	TC	3	UNK	AaeL_AAEL005933, AAEL005933	uncharacterized protein LOC5567265
LOC5578524	254490472	0.265955	0.547241	4.28921	0.390707	0.497152	0.481627	S407C	TA	3	CYT/STR	AaeL_AAEL013730, AAEL013730	actin cytoskeleton-regulatory complex protein pan1
LOC5567647	25231577	0.0726596	0.293678	4.27274	0.132653	0.415471	0.270017	W3544*	GA	3	CYT/STR		LOW QUALITY PROTEIN: spectrin beta chain, non-erythrocytic 5
LOC5571029	326386447	0.270248	0.0584886	4.27255	0.386938	0.120192	0.290808	Y797F	AT	3	RRTT	AaeL_AAEL008759, AAEL008759	bromodomain-containing protein 4B
LOC5572085	344945410	0.890705	0.651046	4.25776	0.198302	0.456747	0.350544	K21I	TA	3	DIV	AaeL_AAEL009502, AAEL009502	zinc finger protein 234
LOC5570566	224788257	0.095201	0.328079	4.25606	0.172336	0.44302	0.318989	P506A	CG	3	TRP	AaeL_AAEL008384, AAEL008384	ATP-binding cassette sub-family A member 3
LOC5576941	42184652	0.216837	0.0294872	4.25586	0.333841	0.0562907	0.226008	G296E	CT	3	MET	AaeL_AAEL012886, AAEL012886	Carboxy/choline esterase Beta Esterase (CCEBE1O)
LOC5574953	313163115	0.178267	0	4.24982	0.302891	0	0.153673	S9T	TAC	3	UNK	AaeL_AAEL011551, AAEL011551	uncharacterized protein LOC5574953
LOC5565732	323132766	0.951665	0.748235	4.24977	0.0934731	0.376629	0.258135	T56A	GA	3	UNK	AaeL_AAEL004960, AAEL004960	uncharacterized protein LOC5565732
LOC5568217	148306588	0.454215	0.188552	4.23962	0.497611	0.309861	0.436392	V975I	GA	3	UNK	AaeL_AAEL006658, AAEL006658	uncharacterized protein LOC5568217
LOC5575083	281602258	0.0735023	0.2937	4.23822	0.13875	0.415734	0.264514	L987S	TC	3	DIV		NTF2-related export protein
LOC5570976	95746689	0.875781	0.630562	4.23799	0.226403	0.465642	0.353027	S1199N	TC	3	UNK	AaeL_AAEL008714, AAEL008714	uncharacterized protein CG7065|putative mediator of rna polymerase ii transcription subunit 29
LOC5575782	124477891	0.187245	0.015625	4.23437	0.299638	0.024996	0.19845	D180G	TC	3	DIV	AaeL_AAEL002716, AAEL002716	arrestin domain-containing protein 2
LOC110678792	332865318	0.149488	0	4.23418	0.238481	0	0.144643	N363S	AG	3	UNK		uncharacterized protein LOC110678792
LOC5566051	347090455	0.3228	0.0922932	4.23335	0.436714	0.176587	0.323772	A1360V	CT	3	CYT/STR	AaeL_AAEL005135, AAEL005135, AAEL005144	mucin-5AC
LOC23687786	368590144	0.618239	0.866743	4.23255	0.472731	0.232569	0.396419	F471L	GT	3	Redox	AaeL_AAEL017366, AAEL017366	probable cytochrome P450 9f2
LOC5578138	237795668	0.0204082	0.197153	4.22379	0.054751	0.325124	0.223305	G302E	GA	3	DIV	AaeL_AAEL013518, AAEL013518	protein embryonic gonad
LOC5565341	322202500	0.398702	0.125481	4.22209	0.482365	0.226843	0.417897	Q23E	CAG	3	UNK	AaeL_AAEL014827, AAEL014827	uncharacterized protein LOC5565341
LOC5570011	212765520	0.0653495	0.279785	4.22163	0.121655	0.403116	0.285971	V100M	CT	3	RRTT	AaeL_AAEL000170, AAEL000170	chorion transcription factor Cf2
LOC5571908	338115396	0.0162338	0.188059	4.2203	0.0301134	0.306888	0.189097	M162I	CT	3	UNK	AaeL_AAEL009405, AAEL009391, AAEL009405	uncharacterized protein LOC5571908
LOC5570776	29508507	0.148936	0	4.2194	0.253508	0	0.126685	Q117P	TG	3	Detox	AaeL_AAEL008532, AAEL008532	acetylcholinesterase
LOC5576334	97439764	0.728494	0.93956	4.21925	0.400436	0.115836	0.310112	L448I	AC	3	DIV	AaeL_AAEL000403, AAEL000403	dynein assembly factor 5, axonemal
LOC5569003	196073540	0.015981	0.187436	4.21842	0.0242878	0.305084	0.164952	V583E	AT	3	UNK	AaeL_AAEL007305, AAEL007305	uncharacterized protein LOC5569003
LOC5565732	323133135	0.894398	0.658198	4.2128	0.182447	0.449321	0.340265	I179V	GA	3	UNK	AaeL_AAEL004960, AAEL004960	uncharacterized protein LOC5565732
LOC5574953	313163103	0.148608	0	4.2106	0.260355	0	0.132257	L5F	CT	3	UNK	AaeL_AAEL011551, AAEL011551	uncharacterized protein LOC5574953
LOC5570235	10145164	0.751134	0.952374	4.20662	0.376393	0.0907029	0.258818	V770F	AC	3	RRTT	AaeL_AAEL008178, AAEL008178	probable DNA helicase MCM9
LOC5566693	405060063	0.148454	0	4.2065	0.252916	0	0.150497	S843L	CT	3	DIV	AaeL_AAEL005564, AAEL005564	PAB-dependent poly(A)-specific ribonuclease subunit PAN2
LOC5570011	212743819	0.339384	0.104167	4.20483	0.453686	0.188827	0.366318	T488A	TC	3	RRTT	AaeL_AAEL000170, AAEL000170	chorion transcription factor Cf2
LOC5571199	337603054	0.495364	0.223936	4.19715	0.499974	0.349321	0.453772	D376N	GA	3	DIV	AaeL_AAEL008896, AAEL008896, AAEL008897	zinc finger protein 350
LOC5580212	350973983	0.392143	0.674242	4.1952	0.467127	0.439957	0.496489	I589V	GA	3	DIV	AaeL_AAEL011926, AAEL011926	T-related protein
LOC5567591	140601000	0.386484	0.668556	4.18943	0.47791	0.418802	0.497396	G89S	AG	3	DIV	AaeL_AAEL006182, AAEL006182	LOW QUALITY PROTEIN: katanin p60 ATPase-containing subunit A1
LOC5579293	92854554	0.555556	0.817617	4.18854	0.493827	0.298302	0.429044	S439N	AG	3	UNK	AaeL_AAEL004381, AAEL004363, AAEL004381	uncharacterized protein LOC5579293
LOC5573629	292178508	0.500922	0.772515	4.18562	0.499947	0.349289	0.458978	K21R	GA	3	RRTT	AaeL_AAEL010613, AAEL010613	nucleolar protein 9
LOC5573836	294152072	0.23329	0.505757	4.18286	0.357958	0.499927	0.459744	I1837V	AG	3	CYT/STR	AaeL_AAEL010757, AAEL010757	titin homolog
LOC5577028	205928696	0.241856	0.51567	4.18257	0.367612	0.49948	0.467461	I4M	AG	3	UNK	AaeL_AAEL012952, AAEL012952	uncharacterized protein LOC5577028
LOC5576225	234902975	0	0.147513	4.18131	0	0.256762	0.118726	I59T	TC	3	DIV	AaeL_AAEL002849, AAEL002849	zinc finger protein 850
LOC5571078	132691297	0.427482	0.706924	4.1765	0.490081	0.414039	0.493158	Q157R	CT	3	RRTT	AaeL_AAEL008794, AAEL008794	DNA-directed RNA polymerase III subunit RPC4
LOC5578908	309463305	0.644872	0.363122	4.17023	0.459592	0.464899	0.499924	V291I	GA	3	LIPID	AaeL_AAEL005300, AAEL005300	putative fatty acyl-CoA reductase CG5065
LOC5570049	215983660	0.477703	0.210391	4.15962	0.5	0.332886	0.456885	A318V	CT	3	DIV	AaeL_AAEL000196, AAEL000196	alkaline phosphatase, tissue-nonspecific isozyme
LOC5565212	247491793	0.210258	0.0281062	4.15311	0.353172	0.0534875	0.215276	M465V	AG	3	PROT	AaeL_AAEL004678, AAEL004678	inactive rhomboid protein 1
LOC5571933	380978530	0.819141	0.55897	4.15151	0.297008	0.492852	0.418037	I97V	GA	3	RRTT	AaeL_AAEL009416, AAEL009416	PHD finger protein 20-like protein 1
LOC5578444	162846487	0.219819	0.0330529	4.15027	0.344585	0.0665874	0.221201	K4N	CA	3	UNK	AaeL_AAEL000509, AAEL000509	uncharacterized protein LOC5578444
LOC5570973	95794665	0	0.146341	4.15	0	0.249851	0.153262	E932G	AG	3	RRTT	AaeL_AAEL008703, AAEL008703, AAEL008707	protein suppressor of white apricot
LOC5578196	221872389	0.6525	0.347296	4.14705	0.663743	0.511032	0.632806	*249E	TAG	3	DIV		failed axon connections
LOC5569088	123045664	0.747986	0.474599	4.13573	0.386503	0.499117	0.474466	V136A	CT	3	LIPID	AaeL_AAEL007363, AAEL007363	phospholipase A2 inhibitor
LOC5577179	310515877	0.822786	0.987179	4.13275	0.291284	0.0257467	0.175587	M255I	TC	3	MET	AaeL_AAEL013046, AAEL013046	glucose dehydrogenase [FAD, quinone]
LOC5577336	183867486	0.652487	0.888148	4.12819	0.456965	0.193881	0.362231	E2139D	GT	3	CYT/STR	AaeL_AAEL000409, AAEL000409, AAEL000446	tight junction protein ZO-1
LOC5577336	183867488	0.666985	0.897943	4.12236	0.44778	0.171362	0.341633	N2139D	CT	3	CYT/STR	AaeL_AAEL000409, AAEL000409, AAEL000446	tight junction protein ZO-1
LOC5578337	264031112	0.224324	0.0361641	4.11264	0.351434	0.0675117	0.231406	A280T	GA	3	UNK	AaeL_AAEL003526, AAEL003526	uncharacterized protein LOC5578337
LOC5579138	188025487	0.0706262	0.284129	4.11105	0.130502	0.396899	0.284924	I320V	AG	3	DIV	AaeL_AAEL014014, AAEL014014	ketimine reductase mu-crystallin
LOC5563963	166811854	0.0217803	0.195821	4.11095	0.0422763	0.316289	0.194862	I320V	AG	3	MET	AaeL_AAEL004014, AAEL004014	glucose dehydrogenase [FAD, quinone]
LOC23687765	14728931	0.748129	0.959335	4.11009	0.650994	0.496517	0.600833	V156G	AGT	3	DIV	AaeL_AAEL017345, AAEL017345	hyphally-regulated protein
LOC5564744	313966369	0.0551982	0.258072	4.10148	0.113348	0.389127	0.250586	Q759H	CA	3	DIV	AaeL_AAEL010449, AAEL010449, AAEL014598	huntingtin-interacting protein 1
LOC5572953	149017973	0	0.14452	4.10134	0	0.243897	0.124711	L176Q	AT	3	DIV	AaeL_AAEL010173, AAEL010173	zinc finger protein 676
LOC5564727	271319573	0.265	0.538462	4.09665	0.384551	0.497449	0.469218	S539R	TA	3	MET	AaeL_AAEL004402, AAEL004402	alpha-L-iduronidase
LOC5567211	334078909	0.935374	0.726258	4.09625	0.117188	0.398152	0.280731	*698L	AT	3	RRTT	AaeL_AAEL000884, AAEL000884	eukaryotic translation initiation factor 2-alpha kinase 1
LOC5566691	405100357	0.144231	0	4.09364	0.260355	0	0.130805	L26R	TG	3	UNK	AaeL_AAEL005565, AAEL005565	uncharacterized protein LOC5566691|putative conserved protein
LOC5572091	344851318	0.143955	0	4.08629	0.247284	0	0.131481	T595S	TA	3	DIV	AaeL_AAEL009512, AAEL009512	glycosylphosphatidylinositol anchor attachment 1 protein
LOC5570155	107841177	0	0.143837	4.08312	0	0.249132	0.116701	A12T	CT	3	SigT	AaeL_AAEL008126, AAEL008126, GPRCIR	latrophilin Cirl
LOC5565422	395545898	0.697489	0.421465	4.07353	0.424477	0.484512	0.495587	I373L	GT	3	MET	AaeL_AAEL000652, AAEL000652, GNBPA2	beta-1,3-glucan-binding protein 2
LOC5576231	234824517	0.493269	0.226612	4.06792	0.496869	0.35503	0.466267	D221N	CT	3	DIV		zinc finger protein 600
LOC5571753	200208798	0.116415	0.35132	4.06023	0.210292	0.453462	0.350057	H33Q	AT	3	DIV	AaeL_AAEL009272, AAEL009272	protein KTI12 homolog
LOC5575043	192738285	0.269382	0.0631833	4.04554	0.382387	0.116829	0.286207	P412S	GA	3	CYT/STR	AaeL_AAEL011600, AAEL011600, AAEL011604	basement membrane-specific heparan sulfate proteoglycan core protein
LOC5573579	178233562	0.481833	0.218055	4.03597	0.499689	0.334801	0.45279	M230V	TC	3	UNK	AaeL_AAEL002094, AAEL002094	uncharacterized protein LOC5573579
LOC5564113	403555217	0.633566	0.357343	4.02861	0.473373	0.457307	0.496687	N112S	TC	3	DIV	AaeL_AAEL004093, AAEL004089, AAEL004093	GATA zinc finger domain-containing protein 14
LOC110679863	405664910	0.00970874	0.165658	4.0148	0.025802	0.273565	0.163379	A461T	GA	3	MET		alpha-amylase 4N-like
LOC5564354	117426622	0.709103	0.436448	4.01223	0.412921	0.491278	0.485992	D1440V	TA	3	DIV	AaeL_AAEL004216, AAEL004216	zonadhesin
LOC5571211	336730461	0.0254545	0.19953	4.00897	0.0575625	0.321475	0.206298	P1415Q	CA	3	UNK	AaeL_AAEL008894, AAEL008894	uncharacterized protein LOC5571211
LOC5565738	322586405	0.264305	0.533654	3.99784	0.385014	0.499527	0.444444	E396V	AT	3	DIV	AaeL_AAEL004940, AAEL004940	zinc finger protein 729|Zinc finger protein 70
LOC5570155	107841165	0	0.1404	3.99155	0	0.244898	0.115319	M16V	TC	3	SigT	AaeL_AAEL008126, AAEL008126, GPRCIR	latrophilin Cirl
LOC5568498	143103380	0.276786	0.0692739	3.97932	0.410503	0.137361	0.291595	P205T	GT	3	MET	AaeL_AAEL006912, AAEL006912	uncharacterized protein LOC5568498
LOC5573746	265329123	0.268859	0.537963	3.97886	0.391902	0.49575	0.479731	H427Q	TG	3	UNK	AaeL_AAEL000260, AAEL000260	uncharacterized protein LOC5573746
LOC5577336	184035738	0.626813	0.352922	3.97072	0.468184	0.4539	0.499179	H164N	GT	3	CYT/STR	AaeL_AAEL000409, AAEL000409, AAEL000446	tight junction protein ZO-1
LOC110677916	305676420	0	0.139484	3.96719	0	0.243373	0.119761	V288A	TC	3	DIV		selenide, water dikinase 2-like|selenide, water dikinase-like
LOC5576699	42414655	0.593387	0.320616	3.96662	0.48255	0.440253	0.497955	K278E	AG	3	RRTT	AaeL_AAEL012725, AAEL012725	chromatin assembly factor 1 subunit A-A
LOC5577179	310515459	0.736244	0.938156	3.95838	0.394001	0.117188	0.282743	R395S	TG	3	MET	AaeL_AAEL013046, AAEL013046	glucose dehydrogenase [FAD, quinone]
LOC5571176	236727382	0.864612	0.626413	3.95773	0.224766	0.46875	0.375813	E13K	TC	3	MET	AaeL_AAEL008875, AAEL008875	LOW QUALITY PROTEIN: GPI mannosyltransferase 1
LOC5572128	224200915	0.320807	0.593166	3.95622	0.437225	0.486787	0.492222	S203P	TC	3	CYT/STR	AaeL_AAEL009528, AAEL009528	probable chitinase 10
LOC5571029	326384254	0.899362	0.675809	3.95392	0.181847	0.440002	0.328367	D66G	GA	3	RRTT	AaeL_AAEL008759, AAEL008759	bromodomain-containing protein 4B
LOC5564180	153381229	0.307187	0.0893113	3.95303	0.41175	0.16771	0.304023	D263N	GA	3	RRTT	AaeL_AAEL004130, AAEL004130	GS homeobox 1
LOC110678808	185739875	0.473958	0.74067	3.94877	0.494019	0.368828	0.491111	N98D	CT	3	UNK		uncharacterized protein LOC110678808
LOC5564796	204576519	0.34359	0.114215	3.94645	0.449299	0.202209	0.349733	R231S	CA	3	RRTT	AaeL_AAEL004437, AAEL004437	RNA/RNP complex-1-interacting phosphatase
LOC5574030	318913426	0.103008	0.327126	3.94026	0.178137	0.449515	0.357593	I5T	AG	3	CSR	AaeL_AAEL010872, AAEL010872	general odorant-binding protein 45-like
LOC5576787	111949351	0.209589	0.0319149	3.93785	0.331968	0.0540123	0.22632	I201L	AC	3	UNK	AaeL_AAEL012763, AAEL012763	uncharacterized protein LOC5576787
LOC5576787	111949351	0.209589	0.0319149	3.93785	0.331968	0.0540123	0.22632	I201L	AC	3	UNK	AaeL_AAEL012763, AAEL012763	uncharacterized protein LOC5576787
LOC5576787	111949351	0.209589	0.0319149	3.93785	0.331968	0.0540123	0.22632	I201L	AC	3	UNK	AaeL_AAEL012763, AAEL012763	uncharacterized protein LOC5576787
LOC5571621	390823208	0	0.137673	3.91906	0	0.242903	0.110727	Q39K	GT	3	MET	AaeL_AAEL009199, AAEL009199	glycoprotein-N-acetylgalactosamine 3-beta-galactosyltransferase 1
LOC5574953	313189946	0.137586	0	3.91674	0.236324	0	0.118998	L881H	TA	3	UNK	AaeL_AAEL011551, AAEL011551	uncharacterized protein LOC5574953
LOC110678190	320387666	0.762745	0.952638	3.91595	0.351968	0.0943615	0.236729	Q202E	GC	3	UNK		uncharacterized protein LOC110678190
LOC5573365	314091656	0.311784	0.581967	3.91478	0.434151	0.486563	0.494836	I140V	AG	3	DIV	AaeL_AAEL010451, AAEL010451	girdin
LOC5565728	323189550	0.0629641	0.263767	3.91116	0.124444	0.384674	0.241052	L491F	GA	3	Redox	AaeL_AAEL004941, AAEL004941, CYP6AK1	cytochrome P450 (CYP6AK1)
LOC5566051	347090616	0.145311	0.0030303	3.9087	0.245812	0.00709211	0.122378	A1414T	GA	3	CYT/STR	AaeL_AAEL005135, AAEL005135, AAEL005144	mucin-5AC
LOC5570156	108004843	0	0.136769	3.89505	0	0.230112	0.119602	I896V	TC	3	TRP	AaeL_AAEL008135, AAEL008135, COG3_AEDAE, Cog3	conserved oligomeric Golgi complex subunit 3|COG complex subunit 3
LOC5567265	139384849	0.0284091	0.20088	3.88867	0.0580874	0.32373	0.188084	N1820T	AC	3	UNK	AaeL_AAEL005933, AAEL005933	uncharacterized protein LOC5567265
LOC5572140	250638101	0.429724	0.697958	3.88296	0.487254	0.422936	0.491041	V153A	GA	3	PROT	AaeL_AAEL009558, AAEL009558	serine protease snake
LOC5576496	372736787	0.0602273	0.258029	3.88108	0.111961	0.383668	0.268478	E14D	GT	3	LIPID	AaeL_AAEL002907, AAEL002907	lipase 1
LOC5578094	348761194	0.0340136	0.211406	3.88004	0.0811548	0.331344	0.218347	M158L	TG	3	TRP	AaeL_AAEL003426, AAEL003426	sialin
LOC5569143	408228577	0.498093	0.759201	3.87693	0.499627	0.36307	0.460262	S350N	AG	3	DIV	AaeL_AAEL007403, AAEL007403	proteoglycan 4|verprolin
LOC5577949	153237141	0	0.135965	3.87372	0	0.227337	0.140843	H1036N	GT	3	UNK	AaeL_AAEL013432, AAEL013427, AAEL013432	uncharacterized protein LOC5577949
LOC5564886	110381674	0.345238	0.117509	3.87199	0.451522	0.202114	0.36778	A90T	CT	3	UNK	AaeL_AAEL004466, AAEL004466	uncharacterized protein LOC5564886
LOC5569955	359610837	0.842249	0.991379	3.87194	0.260034	0.0134523	0.129645	D225E	CA	3	UNK	AaeL_AAEL008050, AAEL008050	uncharacterized protein LOC5569955
LOC5566877	362691322	0.0697115	0.273068	3.86713	0.133914	0.394449	0.265928	V420I	GA	3	SigT	AaeL_AAEL000811, AAEL000811, GPRMTH7	probable G-protein coupled receptor Mth-like 14
LOC5565421	395593709	0.484788	0.226506	3.86609	0.5	0.350057	0.452663	I125T	AG	3	RRTT	AaeL_AAEL000674, AAEL000674	tRNA (uracil-5-)-methyltransferase homolog A
LOC5575284	290609660	0.314786	0.582972	3.86185	0.43452	0.487037	0.495095	L371F	CG	3	RRTT	AaeL_AAEL011744, AAEL011744	ATP-dependent RNA helicase abstrakt
LOC5577752	340204736	0.0267169	0.196377	3.85853	0.052421	0.32383	0.172017	V177L	GT	3	DIV	AaeL_AAEL003288, AAEL003288, AAEL003314	graves disease carrier protein homolog
LOC5570807	222539160	0.490284	0.231476	3.85811	0.499811	0.368828	0.469805	D167E	AC	3	RRTT	AaeL_AAEL008572, AAEL008572	RNA-binding protein 28
LOC5570976	95747091	0.875702	0.64603	3.85235	0.217048	0.463616	0.375715	Q1065P	GT	3	UNK	AaeL_AAEL008714, AAEL008714	uncharacterized protein CG7065|putative mediator of rna polymerase ii transcription subunit 29
LOC5567648	25347019	0.388109	0.657033	3.85188	0.476166	0.44977	0.498097	Y1279H	GA	3	DIV	AaeL_AAEL006231, AAEL006231	GRIP and coiled-coil domain-containing protein 2
LOC5573608	176787625	0.618458	0.33691	3.85026	0.551645	0.44611	0.530948	V574G	ACT	3	RRTT	AaeL_AAEL002098, AAEL002098	DNA repair endonuclease XPF
LOC5567056	114802440	0.434402	0.185559	3.84766	0.490608	0.289627	0.416721	V4L	GT	3	Redox	AaeL_AAEL005775, AAEL005775, CYP325R1	cytochrome P450 (CYP325R1)
LOC5575994	145118647	0.421212	0.175331	3.84009	0.484598	0.2889	0.420691	V278I	CT	3	DIV	AaeL_AAEL002767, AAEL002767	modular serine protease
LOC5563569	105037610	0.813179	0.977612	3.83812	0.310651	0.0386946	0.191327	D223N	AG	3	PROT	AaeL_AAEL000086, AAEL000086, CLIPB32	serine protease easter
LOC5571199	337602481	0.131181	0.362891	3.83769	0.227337	0.466595	0.386884	P231L	CT	3	DIV	AaeL_AAEL008896, AAEL008896, AAEL008897	zinc finger protein 350
LOC5566581	246027792	0.805361	0.973628	3.83089	0.31707	0.0479163	0.207026	I159V	GA	3	CYT/STR	AaeL_AAEL000774, AAEL000774	basement membrane proteoglycan
LOC5563569	105037629	0.820707	0.981013	3.82725	0.302679	0.0346713	0.177048	V229A	CT	3	PROT	AaeL_AAEL000086, AAEL000086, CLIPB32	serine protease easter
LOC5574949	313326775	0.133992	0	3.8214	0.236013	0	0.099723	E64D	CG	3	PROT	AaeL_AAEL011555, AAEL011555	seminal metalloprotease 1
LOC5572402	319651116	0.497396	0.238913	3.82139	0.499987	0.360219	0.467893	S252P	AG	3	DIV	AaeL_AAEL009786, AAEL009786	zinc finger protein 853
LOC5564354	117426621	0.697568	0.431927	3.81962	0.42	0.490939	0.486814	F1440V	GT	3	DIV	AaeL_AAEL004216, AAEL004216	zonadhesin
LOC5568553	1679682	0	0.133738	3.81468	0	0.240681	0.129882	L25F	GA	3	MIT	AaeL_AAEL001109, AAEL001109	glutaredoxin-related protein 5, mitochondrial
LOC23687635	112553723	0.167668	0.0138889	3.81314	0.263672	0.0302959	0.193938	T467S	AT	3	Redox	AaeL_AAEL017215, AAEL017215, CYP325U1	cytochrome P450 (CYP325U1)
LOC5570209	9081381	0.192954	0.442041	3.811	0.319097	0.490612	0.442233	D89N	GA	3	PROT	AaeL_AAEL008162, AAEL008162	aminopeptidase N
LOC5567265	139384773	0.041736	0.22285	3.80442	0.0806648	0.352653	0.213039	A1795T	GA	3	UNK	AaeL_AAEL005933, AAEL005933	uncharacterized protein LOC5567265
LOC5572401	319628100	0.468795	0.215215	3.8043	0.497943	0.337798	0.446196	T62A	AG	3	DIV	AaeL_AAEL014633, AAEL014633	inner centromere protein
LOC5576159	201191087	0.537395	0.274905	3.80342	0.497375	0.413728	0.491613	L326V	GC	3	PROT	AaeL_AAEL012351, AAEL012351	putative serine protease F56F10.1
LOC5571879	297923698	0.0435924	0.226099	3.80163	0.0867769	0.342087	0.235537	F364L	CG	3	MIT	AaeL_AAEL009368, AAEL009368, LS, Lip-syn	lipoyl synthase, mitochondrial|Lipoate synthase|Lipoic acid synthase
LOC5578674	301437761	0.244342	0.50268	3.7981	0.366911	0.5	0.460993	E193D	TA	3	DIV	AaeL_AAEL003617, AAEL003617	prostaglandin reductase 1
LOC5568254	353376026	0.0385027	0.216667	3.79778	0.0851962	0.334252	0.212881	R240K	CT	3	DIV	AaeL_AAEL006702, AAEL006702	angiopoietin-related protein 6
LOC5579807	267714593	0.624611	0.357721	3.79583	0.473878	0.45739	0.498758	D29N	GA	3	DIV	AaeL_AAEL003954, AAEL003954	uncharacterized protein LOC5579807
LOC5568652	171433917	0.563967	0.299601	3.79408	0.489796	0.419284	0.491619	K233N	AC	3	Redox	AaeL_AAEL006992, AAEL006992, CYP6AG6	cytochrome P450 (CYP6AG6)
LOC5578750	65751164	0.10101	0.317895	3.78513	0.183546	0.433884	0.316391	I266N	AT	3	TRP	AaeL_AAEL003703, AAEL003703	protein scarlet
LOC5575308	256141812	0	0.132576	3.7839	0	0.244898	0.112881	L40I	AT	3	CYT/STR	AaeL_AAEL002613, AAEL002613	peritrophin-48
LOC5575020	107246626	0.16288	0.402867	3.78317	0.274079	0.481201	0.397353	S1152A	TG	3	CYT/STR	AAEL011565, AAEL011577	ankyrin-2
LOC5573308	13370606	0.132411	0	3.77954	0.224292	0	0.0982207	D56N	CT	3	Redox	AaeL_AAEL010396, AAEL010396	soma ferritin
LOC110677712	56372361	0.185171	0.0227273	3.77614	0.303153	0.0434568	0.16842	D520N	CT	3	RRTT		ribosome biogenesis ATPase RIX7-like
LOC5565809	325696707	0.215904	0.0386742	3.76982	0.335219	0.0730208	0.206298	V207I	CT	3	UNK	AaeL_AAEL005005, AAEL005005	uncharacterized protein LOC5565809
LOC5572995	226852169	0.588578	0.32383	3.76727	0.4876	0.438804	0.491997	M351L	TG	3	RRTT	AaeL_AAEL001936, AAEL001936	protein msta
LOC5568570	960935	0.556841	0.804373	3.75953	0.493897	0.333329	0.451739	E1200D	AT	3	RRTT	AaeL_AAEL001141, AAEL001141	transcriptional regulator ATRX homolog
LOC5571908	338115876	0.0802198	0.285354	3.75768	0.15879	0.408878	0.307501	D2E	GT	3	UNK	AaeL_AAEL009405, AAEL009391, AAEL009405	uncharacterized protein LOC5571908
LOC23687940	307795670	0.131313	0	3.75048	0.21875	0	0.0987413	T341K	CA	3	PROT		trypsin 5G1-like
LOC5571028	326229547	0.0486961	0.232734	3.73932	0.0890908	0.357593	0.218546	T213A	AG	3	CYT/STR	AaeL_AAEL008752, AAEL008752	titin
LOC5571908	338113314	0.0637944	0.286262	3.7302	0.11963	0.411465	0.291812	P835Q	GAT	3	UNK	AaeL_AAEL009405, AAEL009391, AAEL009405	uncharacterized protein LOC5571908
LOC5579179	84776323	0.0263158	0.190522	3.72578	0.0537224	0.310651	0.196101	A122V	GA	3	RRTT	AaeL_AAEL003868, AAEL003868	DNA repair protein complementing XP-C cells homolog
LOC5568507	143898554	0.143783	0.00518135	3.7227	0.267005	0.0108989	0.144985	E213K	CT	3	TRP	AaeL_AAEL006923, AAEL006923	vacuolar protein sorting-associated protein 37A
LOC5566847	120165621	0.0535345	0.240461	3.72257	0.095	0.359225	0.242832	L312F	CA	3	DIV	AaeL_AAEL000795, AAEL000795	polyubiquitin-C
LOC5570976	95747695	0.805422	0.55983	3.71956	0.318458	0.492322	0.438564	S864T	TA	3	UNK	AaeL_AAEL008714, AAEL008714	uncharacterized protein CG7065|putative mediator of rna polymerase ii transcription subunit 29
LOC5568849	93852068	0.129702	0.355885	3.71802	0.241391	0.45841	0.385696	R1146C	GA	3	UNK	AaeL_AAEL004365, AAEL004365, AAEL004377	uncharacterized protein LOC5568849
LOC110679459	389718847	0.297768	0.0894076	3.71602	0.422674	0.168893	0.340102	K93T	AC	3	UNK		uncharacterized protein LOC110679459
LOC5565220	248464630	0.39683	0.659434	3.70012	0.478096	0.453922	0.498628	A118T	AG	3	DIV	AaeL_AAEL004676, AAEL004676	peroxisomal (S)-2-hydroxy-acid oxidase GLO3
LOC5571175	236644581	0.759155	0.945675	3.69803	0.363142	0.0900242	0.256508	T91I	AG	3	UNK	AaeL_AAEL008858, AAEL008858	uncharacterized protein LOC5571175
LOC5576941	42184685	0.253623	0.0620833	3.69155	0.35729	0.114952	0.232824	V285A	AG	3	MET	AaeL_AAEL012886, AAEL012886	Carboxy/choline esterase Beta Esterase (CCEBE1O)
LOC5568061	15085635	0.464815	0.722814	3.69143	0.49718	0.400301	0.492035	E29D	AT	3	DIV	AaeL_AAEL006484, AAEL006484, GPROP3	opsin-1
LOC5571228	50262691	0.78195	0.958479	3.69084	0.341735	0.0873821	0.231901	S471N	AG	3	SigT	AaeL_AAEL013373, AAEL008931, AAEL013373	G protein-activated inward rectifier potassium channel 3|Kir2B channel protein
LOC5579095	342492452	0.978365	0.794425	3.68998	0.0670251	0.322764	0.176243	P3S	AGT	3	IMM	AaeL_AAEL003857, AAEL003857, AaDef, AaDefA2, AaDefA3, AaDefA4, DEFD, DefA, DefA2, DefA3, DefA4, Defensin-A	defensin-A-like|defensin|defensin A|defensin A4
LOC5570566	224788663	0.244253	0.497887	3.68774	0.369187	0.499987	0.470576	S641N	GA	3	TRP	AaeL_AAEL008384, AAEL008384	ATP-binding cassette sub-family A member 3
LOC5573609	177543253	0.228039	0.0471783	3.6876	0.357411	0.0902731	0.253576	S55R	AT	3	CYT/STR	AaeL_AAEL002099, AAEL002099	larval cuticle protein A2B
LOC110677717	9122300	0.256079	0.51129	3.68529	0.380823	0.49969	0.471498	T913I	CT	3	PROT		glutamyl aminopeptidase-like
LOC5567525	68695697	0	0.128812	3.68438	0	0.203971	0.10292	V459G	AC	3	DIV	AaeL_AAEL006155, AAEL006155	nicalin-1
LOC5574445	194312322	0.997674	0.865265	3.67623	0.00586505	0.234493	0.124972	T179A	GA	3	CYT/STR	AaeL_AAEL011160, AAEL011160	cell wall integrity transcriptional regulator CAS5
LOC5570213	9094279	0.125545	0.35641	3.67589	0.2367	0.521524	0.385666	H431Q	TCG	3	PROT	AaeL_AAEL008158, AAEL008158	aminopeptidase N
LOC5563687	388811163	0.0266667	0.188937	3.66604	0.0610081	0.3098	0.21491	T599A	TC	3	DIV	AaeL_AAEL000531, AAEL000531, AAEL000553	sarcolemmal membrane-associated protein
LOC23687740	347295681	0.638038	0.37653	3.66407	0.454124	0.472388	0.498262	V95L	CG	3	MET	AaeL_AAEL017320, AAEL017320, FOHSDR-2	farnesol dehydrogenase-like|NADP+-dependent farnesol dehydrogenase 2
LOC5570368	250345490	0.805001	0.970143	3.66053	0.304688	0.0580874	0.191155	P649L	AG	3	UNK		uncharacterized protein LOC5570368
LOC5571028	326230583	0.931336	0.737082	3.65524	0.132318	0.389715	0.269842	A558V	TC	3	CYT/STR	AaeL_AAEL008752, AAEL008752	titin
LOC5579164	84486018	0.0571429	0.243881	3.65402	0.0907029	0.367695	0.272885	D380E	TG	3	DIV	AaeL_AAEL003886, AAEL003886	arrestin domain-containing protein 17
LOC5566706	404258756	0.386065	0.647024	3.6536	0.469676	0.455	0.499742	E369D	AT	3	DIV	AaeL_AAEL005585, AAEL005585	zinc finger protein 62
LOC23687635	112545312	0.215097	0.461447	3.63535	0.307528	0.492336	0.418004	I6T	TC	3	Redox	AaeL_AAEL017215, AAEL017215, CYP325U1	cytochrome P450 (CYP325U1)
LOC5578434	164034735	0.0806545	0.280999	3.63359	0.148054	0.404847	0.311359	T63S	AT	3	UNK	AaeL_AAEL000505, AAEL000505	uncharacterized protein LOC5578434
LOC5579193	85685653	0.804193	0.562281	3.62704	0.30948	0.492084	0.427727	S499L	TC	3	Redox	AaeL_AAEL015654, AAEL015654, CYP6AG8	probable cytochrome P450 28a5
LOC5577179	310515891	0.813949	0.973958	3.62322	0.302866	0.0489887	0.193762	N251H	GT	3	MET	AaeL_AAEL013046, AAEL013046	glucose dehydrogenase [FAD, quinone]
LOC5564886	110381673	0.355875	0.132609	3.62297	0.458311	0.222149	0.37665	A90E	GT	3	UNK	AaeL_AAEL004466, AAEL004466	uncharacterized protein LOC5564886
LOC5579119	343009355	0.625485	0.365686	3.62242	0.476503	0.468059	0.49969	V150I	CT	3	IMM	AaeL_AAEL003840, AAEL003840, GALE11	galectin-8
LOC5571908	338115179	0.0226666	0.17908	3.61944	0.0359776	0.294233	0.184747	K235E	TC	3	UNK	AaeL_AAEL009405, AAEL009391, AAEL009405	uncharacterized protein LOC5571908
LOC5565737	323130748	0.99026	0.849181	3.61736	0.0200648	0.251149	0.144222	S296C	CG	3	UNK	AaeL_AAEL004955, AAEL004955	uncharacterized protein LOC5565737
LOC5567648	25347012	0.428021	0.68585	3.61541	0.491252	0.429124	0.490943	P1281L	AG	3	DIV	AaeL_AAEL006231, AAEL006231	GRIP and coiled-coil domain-containing protein 2
LOC5563579	101804898	0.814249	0.973944	3.61466	0.299496	0.0392	0.213318	Y128H	GA	3	TRP	AaeL_AAEL000088, AAEL000088	conserved oligomeric Golgi complex subunit 2
LOC5570560	224900691	0.771645	0.523799	3.61324	0.351931	0.498886	0.459184	N688S	GA	3	RRTT	AaeL_AAEL008382, AAEL008382	tudor domain-containing protein 3
LOC5570555	41496266	0.0636402	0.252805	3.60698	0.120708	0.376818	0.280935	G130S	CT	3	RRTT	AaeL_AAEL008375, AAEL008375	enhancer of mRNA-decapping protein 3
LOC5571908	338106072	0.0267857	0.186882	3.60631	0.0515398	0.302866	0.19067	A1310T	CI	3	UNK	AaeL_AAEL009405, AAEL009391, AAEL009405	uncharacterized protein LOC5571908
LOC5579175	84687113	0.689773	0.43284	3.60026	0.432133	0.492541	0.496466	R1099K	TC	3	RRTT	AaeL_AAEL003893, AAEL003893	DNA repair protein complementing XP-C cells homolog
LOC5575099	22076817	0.221027	0.045156	3.60019	0.341393	0.0909315	0.225689	C348S	AT	3	DIV	AaeL_AAEL011659, AAEL011659	zinc finger HIT domain-containing protein 2
LOC5563925	287471982	0.556944	0.798611	3.59251	0.490531	0.32699	0.436828	M27I	AG	3	TRP	AaeL_AAEL014228, AAEL014228	pickpocket protein 28
LOC5564267	75230597	0.875503	0.656678	3.59018	0.227684	0.452186	0.367571	R59K	AG	3	UNK	AaeL_AAEL014363, AAEL014363	uncharacterized protein LOC5564267
LOC5564267	75230597	0.875503	0.656678	3.59018	0.227684	0.452186	0.367571	R59K	AG	3	UNK	AaeL_AAEL014363, AAEL014363	uncharacterized protein LOC5564267
LOC5575274	291133209	0.432432	0.193182	3.57942	0.489498	0.310172	0.410697	*450V	TI	3	MIT	AaeL_AAEL011746, AAEL011746	succinate--CoA ligase [ADP-forming] subunit beta, mitochondrial
LOC5578908	309462790	0.389695	0.647455	3.57757	0.465181	0.450717	0.498718	I139V	GA	3	LIPID	AaeL_AAEL005300, AAEL005300	putative fatty acyl-CoA reductase CG5065
LOC5572684	78039923	0.229331	0.0505051	3.57302	0.350363	0.0963033	0.251808	S1147P	TC	3	UNK	AaeL_AAEL009952, AAEL009952	uncharacterized protein LOC5572684
LOC5577681	33742028	0.0742098	0.268444	3.57297	0.132053	0.399625	0.267735	R581H	CT	3	MET	AaeL_AAEL013316, AAEL013316	transmembrane and TPR repeat-containing protein CG5038
LOC5568499	143750589	0.694645	0.439382	3.56919	0.423241	0.491938	0.492867	V157A	CT	3	MIT	AaeL_AAEL006915, AAEL006915	serine/threonine-protein phosphatase Pgam5, mitochondrial
LOC5573308	13370075	0.238878	0.0561956	3.56856	0.363693	0.105728	0.244898	H209Q	GT	3	Redox	AaeL_AAEL010396, AAEL010396	soma ferritin
LOC5579175	84687114	0.695175	0.440031	3.56732	0.427922	0.493921	0.495644	E1099K	TC	3	RRTT	AaeL_AAEL003893, AAEL003893	DNA repair protein complementing XP-C cells homolog
LOC5576701	42452475	0.238188	0.0558294	3.56676	0.35687	0.108337	0.282308	A196T	GA	3	UNK	AaeL_AAEL012720, AAEL012720	uncharacterized protein LOC5576701
LOC5574263	300445176	0.124242	0	3.56385	0.20004	0	0.128551	T8S	AT	3	RRTT	AaeL_AAEL011028, AAEL011028	uncharacterized protein LOC5574263
LOC110678156	245142678	0.0227273	0.177047	3.56302	0.0503864	0.283965	0.173027	A65T	CT	3	DIV	AaeL_AAEL000782, AAEL000782	nuclear pore glycoprotein p62-like
LOC5573301	13773962	0.273895	0.0780299	3.55957	0.409604	0.144151	0.301689	S155P	TC	3	DIV	AaeL_AAEL010397, AAEL010397	GILT-like protein 3
LOC5578090	348702350	0.157468	0.386206	3.55669	0.27208	0.473663	0.40526	L299*	TA	3	DIV		LOW QUALITY PROTEIN: lamin Dm0
LOC5566610	242821834	0.123936	0	3.55579	0.215766	0	0.129083	A1380V	CT	3	MIT	AaeL_AAEL000794, AAEL000794	clustered mitochondria protein homolog|K0664_AEDAE
LOC5574168	376065128	0.37204	0.628927	3.5525	0.465642	0.466319	0.499741	D51E	AC	3	DIV	AaeL_AAEL002302, AAEL002302	mantle protein
LOC5577322	183480702	0.633977	0.377165	3.55112	0.465974	0.471889	0.499455	A911T	TC	3	MET	AaeL_AAEL000444, AAEL000444	UDP-glucose:glycoprotein glucosyltransferase
LOC5571908	338113246	0.031746	0.194243	3.5466	0.0570934	0.31493	0.203081	P858A	GC	3	UNK	AaeL_AAEL009405, AAEL009391, AAEL009405	uncharacterized protein LOC5571908
LOC5570565	224813974	0.161039	0.390407	3.54647	0.267452	0.476311	0.404661	G428V	GT	3	TRP		ATP-binding cassette sub-family A member 3
LOC5565339	322270154	0.314679	0.105589	3.54598	0.437886	0.190661	0.335583	M216R	AC	3	UNK	AaeL_AAEL014825, AAEL014825	uncharacterized protein LOC5565339
LOC5576703	288771374	0.37207	0.147094	3.54529	0.471004	0.254384	0.386814	S470L	CT	3	DIV	AaeL_AAEL011791, AAEL011791	putative leucine-rich repeat-containing protein DDB_G0290503
LOC5564354	117426478	0.199787	0.0347222	3.54406	0.321235	0.0708261	0.231111	G1413D	GA	3	DIV	AaeL_AAEL004216, AAEL004216	zonadhesin
LOC5570008	212473371	0.592624	0.825612	3.54327	0.484387	0.278441	0.430305	P71T	TG	3	UNK	AaeL_AAEL000176, AAEL000176	uncharacterized protein CG3556
LOC5564352	117500475	0.0531513	0.232684	3.5429	0.100837	0.355796	0.215355	A467V	GA	3	TRP	AaeL_AAEL004213, AAEL004213	monocarboxylate transporter 7
LOC5574076	359903531	0.862407	0.994505	3.53787	0.221201	0.0125518	0.122212	A926P	CG	3	DIV	AaeL_AAEL010914, AAEL010914, AAEL010916	tyrosine-protein phosphatase non-receptor type 23
LOC5567211	334078916	0.942121	0.759857	3.52947	0.107037	0.366231	0.240912	E696K	TC	3	RRTT	AaeL_AAEL000884, AAEL000884	eukaryotic translation initiation factor 2-alpha kinase 1
LOC5571462	135478763	0.157104	0.00609756	3.52393	0.24346	0.0105817	0.1414	Q117H	TID	3	DIV	AaeL_AAEL009094, AAEL009094, WSCD_AEDAE	WSCD family member AAEL009094
LOC5565734	322616249	0.30381	0.0988616	3.52069	0.422406	0.187305	0.32	D1309N	CT	3	TRP	AaeL_AAEL004954, AAEL004954, AAEL004968	ATP-binding cassette sub-family A member 13
LOC5566938	115545314	1	1	3.5201	0.494326	0.415225	0.486201	E50Q	ACG	3	TRP	AaeL_AAEL005678, AAEL005678	adenosine 3'-phospho 5'-phosphosulfate transporter 1
LOC5571907	338037010	0.00303951	0.13064	3.51866	0.00649344	0.232396	0.100954	N273D	TC	3	Redox	AaeL_AAEL009414, AAEL009414	NADH dehydrogenase [ubiquinone] 1 alpha subcomplex subunit 9, mitochondrial
LOC5567250	138417912	0.0178571	0.165064	3.51563	0.0470315	0.270049	0.170519	E10K	CT	3	TRP	AaeL_AAEL005918, AAEL005918	multidrug resistance-associated protein 4
LOC5579293	92854334	0.442593	0.695394	3.51346	0.492336	0.423922	0.492928	V366I	AG	3	UNK	AaeL_AAEL004381, AAEL004363, AAEL004381	uncharacterized protein LOC5579293
LOC5571908	338115451	0.0370571	0.202882	3.51181	0.0787403	0.323683	0.222334	E144A	TG	3	UNK	AaeL_AAEL009405, AAEL009391, AAEL009405	uncharacterized protein LOC5571908
LOC5571908	338114968	0.0226634	0.17492	3.51095	0.0493511	0.286706	0.169835	R305K	CT	3	UNK	AaeL_AAEL009405, AAEL009391, AAEL009405	uncharacterized protein LOC5571908
LOC5564354	117426630	0.707977	0.456415	3.50847	0.410009	0.496182	0.48	Q1443K	AC	3	DIV	AaeL_AAEL004216, AAEL004216	zonadhesin
LOC5580215	351066246	0.134647	0.0047619	3.50838	0.221718	0.0111108	0.141408	V345E	TA	3	TRP	AaeL_AAEL011924, AAEL011924	two pore potassium channel protein sup-9
LOC5575020	107246653	0.62932	0.852547	3.50189	0.471182	0.25174	0.394374	Q1161E	GC	3	CYT/STR	AAEL011565, AAEL011577	ankyrin-2
LOC5567521	68600023	0.667792	0.41397	3.50002	0.44154	0.485137	0.495644	T1232S	TA	3	DIV	AaeL_AAEL006145, AAEL006145	dynactin subunit 1
LOC5576496	372737590	0.241077	0.0593074	3.4934	0.353299	0.111409	0.243517	Q282R	AG	3	LIPID	AaeL_AAEL002907, AAEL002907	lipase 1
LOC5567590	140494379	0.359225	0.139194	3.49207	0.457905	0.234415	0.384715	A91S	CA	3	RRTT	AaeL_AAEL006172, AAEL006172	another transcription unit protein
LOC5571907	338037009	0.00308642	0.129567	3.48712	0.0066115	0.230856	0.101726	N273S	TC	3	Redox	AaeL_AAEL009414, AAEL009414	NADH dehydrogenase [ubiquinone] 1 alpha subcomplex subunit 9, mitochondrial
LOC5570565	224819772	0.47263	0.23004	3.486	0.498592	0.372667	0.451994	R2361S	CA	3	TRP		ATP-binding cassette sub-family A member 3
LOC5567542	69627550	0.41526	0.182717	3.48339	0.485425	0.290963	0.42325	V17I	CT	3	CYT/STR	AaeL_AAEL006147, AAEL006147, AAEL006151	probable chitinase 2
LOC5575389	288719164	0.420089	0.186669	3.48113	0.490566	0.304023	0.428572	Q154H	CA	3	UNK	AaeL_AAEL011788, AAEL011788	uncharacterized protein LOC5575389
LOC5567205	334528425	0.720138	0.47131	3.47271	0.398308	0.497984	0.476099	R30Q	TC	3	DIV	AaeL_AAEL000889, AAEL000889	Carboxy/choline esterase (CCEglt1G)
LOC5579844	219762776	0.0488722	0.222505	3.47256	0.0867769	0.352916	0.229152	K39*	AT	3	TRP	AaeL_AAEL005854, AAEL005854	proton-coupled amino acid transporter-like protein CG1139
LOC5571975	321546187	0.707678	0.457692	3.47175	0.418192	0.496957	0.481717	D361N	AG	3	UNK	AaeL_AAEL009454, AAEL009454	uncharacterized protein LOC5571975
LOC5576264	111438337	0.246511	0.491071	3.47096	0.372512	0.5	0.466147	T85S	GC	3	DIV	AaeL_AAEL012418, AAEL012418	plancitoxin-1
LOC5571908	338102691	0.0124936	0.151522	3.46887	0.0219753	0.257378	0.143155	T2437A	TC	3	UNK	AaeL_AAEL009405, AAEL009391, AAEL009405	uncharacterized protein LOC5571908
LOC5575990	145336373	0.102016	0.306159	3.46664	0.169364	0.427859	0.299377	S50T	TA	3	UNK	AaeL_AAEL002757, AAEL002757	uncharacterized protein LOC5575990
LOC5568217	148306561	0.472615	0.230769	3.46625	0.497831	0.362812	0.448494	T966S	AT	3	UNK	AaeL_AAEL006658, AAEL006658	uncharacterized protein LOC5568217
LOC5571908	338106098	0.012987	0.152197	3.45742	0.0255548	0.259644	0.150722	L1301P	AG	3	UNK	AaeL_AAEL009405, AAEL009391, AAEL009405	uncharacterized protein LOC5571908
LOC5568566	1319710	0.265593	0.075731	3.44492	0.39054	0.139898	0.249734	L432M	GT	3	DIV	AaeL_AAEL001118, AAEL001118	protein CASC1
LOC5578302	195163309	0.258929	0.504022	3.44377	0.383769	0.499966	0.474129	K37R	TC	3	RRTT	AaeL_AAEL013616, AAEL013616	LOW QUALITY PROTEIN: PHD finger protein 12
LOC5576190	96199959	0.901571	0.700311	3.4376	0.179307	0.423975	0.341605	R131G	CT	3	UNK	AaeL_AAEL012381, AAEL012381	uncharacterized protein LOC5576190
LOC5568217	148305952	0.613488	0.361574	3.43694	0.471655	0.462656	0.499926	V763I	GA	3	UNK	AaeL_AAEL006658, AAEL006658	uncharacterized protein LOC5568217
LOC5564354	117424869	0.213545	0.450901	3.43629	0.32	0.495728	0.427966	N877H	AC	3	DIV	AaeL_AAEL004216, AAEL004216	zonadhesin
LOC5565809	325696717	0.201189	0.0378547	3.4312	0.32222	0.0698112	0.200689	D203E	GT	3	UNK	AaeL_AAEL005005, AAEL005005	uncharacterized protein LOC5565809
LOC5579138	188020193	0.806246	0.966102	3.4292	0.32182	0.0736247	0.22507	I39K	AT	3	DIV	AaeL_AAEL014014, AAEL014014	ketimine reductase mu-crystallin
LOC5579652	267402897	0.208245	0.444031	3.42491	0.33099	0.495868	0.451223	S478T	GC	3	TRP	AaeL_AAEL003969, AAEL003969	ALK tyrosine kinase receptor
LOC23687564	14775196	0.16193	0.0180723	3.42164	0.274027	0.0314056	0.177743	L4F	GC	3	DIV	AaeL_AAEL017144, AAEL017144	glycine-rich protein 5|glycine-rich putative salivary secreted peptide
LOC23687940	307795615	0.169563	0.0217391	3.42087	0.28982	0.0384468	0.169132	F323L	TC	3	PROT
LOC5565738	322605626	0.190154	0.0322581	3.41646	0.305966	0.0671456	0.201891	H1130P	AC	3	DIV	AaeL_AAEL004940, AAEL004940	zinc finger protein 729|Zinc finger protein 70
LOC5579025	10636262	0.386788	0.162862	3.40904	0.474802	0.272812	0.426191	P14L	GA	3	MIT	AaeL_AAEL013967, AAEL013967	probable methylcrotonoyl-CoA carboxylase beta chain, mitochondrial
LOC5575719	147150314	0.464301	0.226021	3.40441	0.498565	0.344006	0.453508	H584L	AT	3	DIV	AaeL_AAEL012033, AAEL012033	phosrestin-2
LOC5575020	107273101	0.00722216	0.136606	3.39996	0.0136048	0.240572	0.12769	F2013S	TC	3	CYT/STR	AAEL011565, AAEL011577	ankyrin-2
LOC5567893	396824041	0.255894	0.498608	3.39921	0.369209	0.499927	0.449515	T45A	TC	3	DIV	AaeL_AAEL006338, AAEL006338	sulfotransferase family cytosolic 1B member 1
LOC5571240	356262811	0.97768	0.83017	3.39689	0.0438376	0.284542	0.156367	G404A	GC	3	RRTT	AaeL_AAEL008935, AAEL008935	trithorax group protein osa
LOC23687635	112545541	0.023622	0.172347	3.39351	0.0654984	0.279397	0.167654	H82Q	TA	3	Redox	AaeL_AAEL017215, AAEL017215, CYP325U1	cytochrome P450 (CYP325U1)
LOC5573883	156766474	0.138189	0.353385	3.38828	0.239877	0.452507	0.374781	S985N	CT	3	TRP	AaeL_AAEL010796, AAEL010796	LOW QUALITY PROTEIN: trafficking protein particle complex subunit 10
LOC110678192	327034479	0.152797	0.0145155	3.38399	0.255457	0.0283629	0.156573	D1717A	TG	3	LIPID
LOC5567474	378684957	0.133729	0.34697	3.3794	0.239796	0.456166	0.364252	P93S	GA	3	DIV	AaeL_AAEL000946, AAEL000946	putative GPI-anchored protein pfl2
LOC5579843	219797604	0.30346	0.550157	3.37613	0.431633	0.495868	0.486696	T270I	CT	3	TRP	AaeL_AAEL005865, AAEL005865	proton-coupled amino acid transporter-like protein CG1139
LOC5575406	113491143	0.0348558	0.193388	3.37411	0.0651433	0.307839	0.192403	E329K	CT	3	MET	AaeL_AAEL011809, AAEL011809	glucose dehydrogenase [FAD, quinone]
LOC23687635	112545315	0.196708	0.427356	3.36506	0.272188	0.4822	0.384222	S7L	CT	3	Redox	AaeL_AAEL017215, AAEL017215, CYP325U1	cytochrome P450 (CYP325U1)
LOC5570366	250466464	0.846774	0.627906	3.3596	0.256319	0.467092	0.39551	S283N	AG	3	UNK	AaeL_AAEL008274, AAEL008274	uncharacterized protein LOC5570366
LOC5574173	375960275	0.284615	0.52876	3.35591	0.413194	0.498615	0.491675	A63T	GA	3	DIV	AAEL002285, AAEL002316	gastrula zinc finger protein XlCGF7.1
LOC5564670	389471765	0.543229	0.778479	3.35471	0.499774	0.35124	0.439874	N84K	GT	3	DIV	AaeL_AAEL014554, AAEL014554	zinc finger protein 679
LOC5577974	312847685	0.0281077	0.179745	3.35457	0.0586875	0.29604	0.174567	S232A	AC	3	TRP	AaeL_AAEL011554, AAEL011554	proteasomal ubiquitin receptor ADRM1 homolog
LOC5577179	310515823	0.815122	0.969231	3.3542	0.315961	0.0607766	0.197881	F273L	CA	3	MET	AaeL_AAEL013046, AAEL013046	glucose dehydrogenase [FAD, quinone]
LOC5577375	186817564	0.119906	0.326842	3.35379	0.236291	0.44127	0.346197	N78H	TG	3	UNK	AaeL_AAEL000455, AAEL000455	uncharacterized protein LOC5577375
LOC5564267	75230576	0.880892	0.674381	3.35129	0.210083	0.438189	0.345396	Y52C	GA	3	UNK	AaeL_AAEL014363, AAEL014363	uncharacterized protein LOC5564267
LOC5564267	75230576	0.880892	0.674381	3.35129	0.210083	0.438189	0.345396	Y52C	GA	3	UNK	AaeL_AAEL014363, AAEL014363	uncharacterized protein LOC5564267
LOC5571458	135053115	0.0481579	0.21641	3.3512	0.0890908	0.333086	0.238534	L288F	GT	3	DIV	AaeL_AAEL009093, AAEL009093, AAEL009102	protein crumbs
LOC5572356	284594849	0.334017	0.104834	3.34602	0.457692	0.189835	0.359286	E158D	AGT	3	RRTT	AaeL_AAEL009757, AAEL009757	protein msta
LOC5570156	108010828	0.0122699	0.146288	3.34463	0.020831	0.250732	0.133889	D421N	CT	3	TRP	AaeL_AAEL008135, AAEL008135, COG3_AEDAE, Cog3	conserved oligomeric Golgi complex subunit 3|COG complex subunit 3
LOC5567643	24655680	0.7492	0.509702	3.34304	0.383588	0.499531	0.475527	H587Q	GT	3	UNK	AaeL_AAEL006228, AAEL006228	uncharacterized protein LOC5567643
LOC5566624	243480422	0.298171	0.100134	3.34276	0.422936	0.186483	0.336236	F9L	TC	3	DIV	AaeL_AAEL000793, AAEL000793	venom allergen 3|putative secreted protein
LOC5567541	69591655	0.154528	0.0160714	3.34042	0.276104	0.0312421	0.168155	N52T	AC	3	PROT	AaeL_AAEL006121, AAEL006121	transmembrane protease serine 9
LOC5567210	334165910	0.57535	0.328904	3.33453	0.488786	0.437506	0.495364	G291S	GA	3	DIV	AaeL_AAEL000869, AAEL000869	zinc finger protein sens
LOC5573836	294152040	0.147264	0.363122	3.334	0.251045	0.463542	0.363809	S1826N	GA	3	CYT/STR	AaeL_AAEL010757, AAEL010757	titin homolog
LOC5567648	25349992	0.697492	0.452851	3.33153	0.436224	0.49541	0.495102	D288N	TC	3	DIV	AaeL_AAEL006231, AAEL006231	GRIP and coiled-coil domain-containing protein 2
LOC5571034	326024693	0.926257	0.742293	3.3297	0.137467	0.378226	0.253387	S260L	AG	3	MET	AaeL_AAEL008757, AAEL008757	Carboxy/choline esterase Alpha Esterase (CCEunk7O)
LOC5570566	224788224	0.117895	0.322758	3.32431	0.207378	0.436387	0.331184	D495N	GA	3	TRP	AaeL_AAEL008384, AAEL008384	ATP-binding cassette sub-family A member 3
LOC110678814	124545576	0.329532	0.574996	3.31167	0.447664	0.489244	0.497041	T288A	TC	3	DIV		diacylglycerol kinase eta-like
LOC5565212	247491806	0.173706	0.025892	3.31136	0.30884	0.0473858	0.182642	L469H	TA	3	PROT	AaeL_AAEL004678, AAEL004678	inactive rhomboid protein 1
LOC5579495	283895013	0.633679	0.38738	3.30625	0.464965	0.475045	0.497873	V145M	AG	3	UNK	AaeL_AAEL015253, AAEL015253	uncharacterized protein LOC5579495
LOC5579887	55915464	0.339815	0.130886	3.30389	0.448966	0.227413	0.35124	D17G	TC	3	TRP	AaeL_AAEL001024, AAEL001024	solute carrier family 25 member 51
LOC5575314	256289378	0.762639	0.938161	3.29931	0.363555	0.107755	0.274507	G144E	AG	3	CYT/STR	AaeL_AAEL002630, AAEL002630	probable chitinase 10
LOC5578481	160895203	0.437301	0.681527	3.29741	0.492043	0.434008	0.495526	C93Y	AG	3	Redox	AaeL_AAEL000495, AAEL000495, GPXH3	Glutathione Peroxidase (GPXH3)
LOC5567157	173950426	0.172536	0.0256076	3.2958	0.287335	0.0509566	0.176145	F313Y	TA	3	RRTT	AaeL_AAEL005905, AAEL005905	DALR anticodon-binding domain-containing protein 3
LOC5572091	344851339	0.223664	0.0537135	3.29496	0.33099	0.10314	0.225394	T588P	TG	3	DIV	AaeL_AAEL009512, AAEL009512	glycosylphosphatidylinositol anchor attachment 1 protein
LOC5571618	390898766	0.487546	0.727292	3.28617	0.499841	0.401527	0.477177	V427L	TG	3	MET	AaeL_AAEL009204, AAEL009204	glucose dehydrogenase [FAD, quinone]
LOC5571028	326229938	0.340642	0.132075	3.2858	0.451246	0.226737	0.37625	S343N	GA	3	CYT/STR	AaeL_AAEL008752, AAEL008752	titin
LOC5571228	50262715	0.777563	0.961445	3.28486	0.343796	0.0831825	0.234755	G479V	TAG	3	SigT	AaeL_AAEL013373, AAEL008931, AAEL013373	G protein-activated inward rectifier potassium channel 3|Kir2B channel protein
LOC5564142	403271085	0.57745	0.333168	3.28128	0.492628	0.444444	0.497647	P178S	GA	3	RRTT	AaeL_AAEL004106, AAEL004106	protein deadpan
LOC5565462	146718568	0.781769	0.550707	3.27523	0.346566	0.492491	0.441994	A749V	AG	3	TRP	AaeL_AAEL004791, AAEL004791	sorting nexin-13
LOC5570073	47913819	0.616228	0.371407	3.27158	0.468581	0.467781	0.499085	V652D	TA	3	DIV	AaeL_AAEL001357, AAEL001357	serine/arginine repetitive matrix protein 2
LOC5575482	223526138	0.162998	0.0214286	3.26733	0.246172	0.0457764	0.164255	A14T	CT	3	RRTT	AaeL_AAEL011866, AAEL011866	DNA-directed RNA polymerase III subunit RPC8
LOC5571933	380978793	0.023622	0.166937	3.25391	0.0475907	0.274522	0.176916	E184D	GT	3	RRTT	AaeL_AAEL009416, AAEL009416	PHD finger protein 20-like protein 1
LOC5569648	151679885	0.0317982	0.182821	3.25184	0.0736247	0.303898	0.196681	N663S	TC	3	DIV	AaeL_AAEL007810, AAEL007810	augmin complex subunit dgt6
LOC5566051	347090627	0.141196	0.0116526	3.2479	0.242015	0.0213498	0.125385	Q1417H	GC	3	CYT/STR	AaeL_AAEL005135, AAEL005135, AAEL005144	mucin-5AC
LOC5563760	295111496	0.0511509	0.217272	3.24484	0.0991432	0.34003	0.248179	N112S	TC	3	DIV	AaeL_AAEL014253, AAEL014107, AAEL014253	protein-glutamate O-methyltransferase
LOC110677856	36887937	0.342727	0.135234	3.23595	0.450612	0.233747	0.381886	A1602T	GA	3	UNK		uncharacterized protein LOC110677856
LOC5577322	183490244	0.217714	0.0518571	3.22611	0.340143	0.103993	0.233364	V141A	AG	3	MET	AaeL_AAEL000444, AAEL000444	UDP-glucose:glycoprotein glucosyltransferase
LOC5570213	9093643	0.547643	0.307792	3.21609	0.495594	0.434297	0.496266	Q219H	AT	3	PROT	AaeL_AAEL008158, AAEL008158	aminopeptidase N
LOC5568046	15918576	0.20681	0.432773	3.21262	0.3322	0.490898	0.43055	I118K	TA	3	UNK	AaeL_AAEL006483, AAEL006483	uncharacterized protein LOC5568046
LOC5572086	344950579	0.360104	0.149133	3.21017	0.460858	0.253726	0.396319	E318D	TA	3	RRTT	AaeL_AAEL009499, AAEL009499	transcription factor grauzone
LOC5563617	105083158	0.844141	0.980777	3.20091	0.248648	0.0378011	0.153505	K275E	GA	3	PROT	AaeL_AAEL000059, AAEL000059, AAEL015430, CLIPB19	serine protease easter
LOC5565223	247473920	0.131959	0.00884956	3.17578	0.235392	0.0187337	0.13904	E515D	AT	3	TRP	AaeL_AAEL004664, AAEL004655, AAEL004664	potassium channel subfamily K member 18|uncharacterized protein LOC5565223
LOC23687940	307795312	0.290336	0.526875	3.17538	0.427514	0.499405	0.489723	G222C	GT	3	PROT		trypsin 5G1-like
LOC110677856	36887929	0.307451	0.111711	3.17244	0.425448	0.19996	0.350663	C1599Y	GA	3	UNK		uncharacterized LOC110677856
